# Supplementary material for: Adaptor protein supersaturation drives innate immune signaling and cell fate
Source: bioRxiv preprint, doi:10.1101/2023.03.20.533581, version 4 (2025-12-07)
Supplement: Supplemental Table 4 [file 533581_file19.xlsx]

## Sheet: Table_S4
DFD-mEos	DFD-mEos clone	DFD-mEos subfamily	DFD-µNS	DFD-µNS clone	DFD-µNS subfamily	seedability	hit (True/False)	batch run
ASC	rhx0927	PYD, CARD	DDX58	rhx1884	2CARD	1.31079	FALSE	1
NLRP3	rhx0928	PYD	DDX58	rhx1884	2CARD	1.94167	FALSE	1
DR6	rhx1219	DD	DDX58	rhx1884	2CARD	-0.186837	FALSE	1
DR6	rhx1220	CARD	DDX58	rhx1884	2CARD	1.11118	FALSE	1
ASC	rhx0988	PYD	DDX58	rhx1884	2CARD	1.31338	FALSE	1
ASC	rhx0989	CARD	DDX58	rhx1884	2CARD	0.78869	FALSE	1
CRADD	rhx1223	CARD	DDX58	rhx1884	2CARD	-0.112851	FALSE	1
ASC	rhx0927	PYD, CARD	NLRP2	rhx1136	PYD	1.03099	FALSE	1
NLRP3	rhx0928	PYD	NLRP2	rhx1136	PYD	0.428782	FALSE	1
DR6	rhx1219	DD	NLRP2	rhx1136	PYD	-0.0430298	FALSE	1
DR6	rhx1220	CARD	NLRP2	rhx1136	PYD	-0.115905	FALSE	1
ASC	rhx0988	PYD	NLRP2	rhx1136	PYD	0.890259	FALSE	1
ASC	rhx0989	CARD	NLRP2	rhx1136	PYD	0.491689	FALSE	1
LRRD1	rhx1033	DD	NLRP2	rhx1136	PYD	0.523744	FALSE	1
CRADD	rhx1223	CARD	NLRP2	rhx1136	PYD	-0.0514396	FALSE	1
ANKDD1B	rhx2932	DD	NLRP2	rhx1136	PYD	-0.303574	FALSE	1
AIM2	rhx1052	PYD	DDX58	rhx1884	2CARD	1.3049	FALSE	1
CFLAR	rhx1053	2DED	DDX58	rhx1884	2CARD	-0.0544722	FALSE	1
QRICH1	rhx1229	CARD	DDX58	rhx1884	2CARD	0.18844	FALSE	1
Pyrin	rhx1054	PYD	DDX58	rhx1884	2CARD	0.209917	FALSE	1
DEDD	rhx2935	DED	DDX58	rhx1884	2CARD	0.578656	FALSE	1
NGFR	rhx1062	DD	DDX58	rhx1884	2CARD	0.461147	FALSE	1
AIM2	rhx1052	PYD	NLRP2	rhx1136	PYD	1.10531	FALSE	1
CFLAR	rhx1053	2DED	NLRP2	rhx1136	PYD	1.04187	FALSE	1
QRICH1	rhx1229	CARD	NLRP2	rhx1136	PYD	1.36566	FALSE	1
Pyrin	rhx1054	PYD	NLRP2	rhx1136	PYD	1.01271	FALSE	1
IRAK2	rhx1055	DD	NLRP2	rhx1136	PYD	-0.1523	FALSE	1
NOL3	rhx1056	CARD	NLRP2	rhx1136	PYD	1.04152	FALSE	1
DEDD	rhx2935	DED	NLRP2	rhx1136	PYD	-0.186021	FALSE	1
UNC5C	rhx1060	DD	NLRP2	rhx1136	PYD	0.227863	FALSE	1
NGFR	rhx1062	DD	NLRP2	rhx1136	PYD	-0.5752	FALSE	1
ANK1	rhx1063	DD	DDX58	rhx1884	2CARD	1.21451	FALSE	1
CASP1	rhx1066	CARD	DDX58	rhx1884	2CARD	1.49293	FALSE	1
MYD88	rhx1311	DD, TIR	DDX58	rhx1884	2CARD	0.0897006	FALSE	1
MNDA	rhx1067	PYD	DDX58	rhx1884	2CARD	0.765952	FALSE	1
FADD	rhx1312	DED, DD	DDX58	rhx1884	2CARD	-0.18737	FALSE	1
CASP2	rhx1068	CARD	DDX58	rhx1884	2CARD	2.53118	FALSE	1
CASP8	rhx1313	2DED	DDX58	rhx1884	2CARD	-0.637807	FALSE	1
IRAK1	rhx1070	DD	DDX58	rhx1884	2CARD	0.903775	FALSE	1
ICEBERG	rhx1073b	CARD	DDX58	rhx1884	2CARD	5.66156	TRUE	1
NLRP6	rhx1074	PYD	DDX58	rhx1884	2CARD	3.31919	FALSE	1
ANK1	rhx1063	DD	NLRP2	rhx1136	PYD	-0.563596	FALSE	1
CASP1	rhx1066	CARD	NLRP2	rhx1136	PYD	0.245661	FALSE	1
MYD88	rhx1311	DD, TIR	NLRP2	rhx1136	PYD	0.762543	FALSE	1
MNDA	rhx1067	PYD	NLRP2	rhx1136	PYD	-0.634368	FALSE	1
FADD	rhx1312	DED, DD	NLRP2	rhx1136	PYD	2.97404	FALSE	1
CASP2	rhx1068	CARD	NLRP2	rhx1136	PYD	0.833856	FALSE	1
CASP8	rhx1313	2DED	NLRP2	rhx1136	PYD	0.939847	FALSE	1
CASP4	rhx1069	CARD	NLRP2	rhx1136	PYD	-0.918778	FALSE	1
IRAK1	rhx1070	DD	NLRP2	rhx1136	PYD	-0.391689	FALSE	1
DAPK1	rhx1072	DD	NLRP2	rhx1136	PYD	-0.20432	FALSE	1
ICEBERG	rhx1073b	CARD	NLRP2	rhx1136	PYD	-2.52147	FALSE	1
NLRP6	rhx1074	PYD	NLRP2	rhx1136	PYD	0.997363	FALSE	1
NLRP12	rhx1076	PYD	DDX58	rhx1884	2CARD	2.54247	FALSE	1
NLRP5	rhx1077	PYD	DDX58	rhx1884	2CARD	0.225426	FALSE	1
CRADD	rhx1078	CARD, DD	DDX58	rhx1884	2CARD	1.2668	FALSE	1
ANK3	rhx1099	DD	DDX58	rhx1884	2CARD	2.10105	FALSE	1
BIRC3	rhx1100	CARD	DDX58	rhx1884	2CARD	1.29392	FALSE	1
BIRC2	rhx1101	CARD	DDX58	rhx1884	2CARD	2.48582	FALSE	1
PEA15	rhx1102b	DED	DDX58	rhx1884	2CARD	2.62228	FALSE	1
IFI16	rhx1103	PYD	DDX58	rhx1884	2CARD	1.78798	FALSE	1
ANKDD1A	rhx1105	DD	DDX58	rhx1884	2CARD	-0.544582	FALSE	1
NLRP12	rhx1076	PYD	NLRP2	rhx1136	PYD	-2.77597	FALSE	1
NLRP5	rhx1077	PYD	NLRP2	rhx1136	PYD	-0.323267	FALSE	1
CRADD	rhx1078	CARD, DD	NLRP2	rhx1136	PYD	-0.261679	FALSE	1
NFKB2	rhx1097	DD	NLRP2	rhx1136	PYD	-0.853436	FALSE	1
ANK2	rhx1098	DD	NLRP2	rhx1136	PYD	0.0705775	FALSE	1
ANK3	rhx1099	DD	NLRP2	rhx1136	PYD	-0.19234	FALSE	1
BIRC3	rhx1100	CARD	NLRP2	rhx1136	PYD	-0.344783	FALSE	1
BIRC2	rhx1101	CARD	NLRP2	rhx1136	PYD	-0.133446	FALSE	1
PEA15	rhx1102b	DED	NLRP2	rhx1136	PYD	-0.191634	FALSE	1
IFI16	rhx1103	PYD	NLRP2	rhx1136	PYD	0.461221	FALSE	1
ANKDD1A	rhx1105	DD	NLRP2	rhx1136	PYD	0.735003	FALSE	1
COP1	rhx1107	CARD	DDX58	rhx1884	2CARD	2.16923	FALSE	1
CARD17	rhx1108	CARD	DDX58	rhx1884	2CARD	1.43581	FALSE	1
MAVS	rhx1379	CARD	DDX58	rhx1884	2CARD	6.63281	TRUE	1
IFIX	rhx1109	PYD	DDX58	rhx1884	2CARD	-1.35776	FALSE	1
CASP12	rhx2937	CARD	DDX58	rhx1884	2CARD	-0.301698	FALSE	1
UNC5A	rhx1115	DD	DDX58	rhx1884	2CARD	1.54392	FALSE	1
NLRP9	rhx1116	PYD	DDX58	rhx1884	2CARD	1.68107	FALSE	1
MAVS	rhx1117	CARD	DDX58	rhx1884	2CARD	4.60043	FALSE	1
FADD	rhx1899	DED	DDX58	rhx1884	2CARD	0.606328	FALSE	1
NLRP14	rhx1118	PYD	DDX58	rhx1884	2CARD	1.1231	FALSE	1
NLRP13	rhx1119	PYD	DDX58	rhx1884	2CARD	1.78417	FALSE	1
POP2	rhx1106	PYD	NLRP2	rhx1136	PYD	0.295432	FALSE	1
COP1	rhx1107	CARD	NLRP2	rhx1136	PYD	0.243638	FALSE	1
CARD17	rhx1108	CARD	NLRP2	rhx1136	PYD	0.557327	FALSE	1
MAVS	rhx1379	CARD	NLRP2	rhx1136	PYD	-0.579139	FALSE	1
IFIX	rhx1109	PYD	NLRP2	rhx1136	PYD	1.45227	FALSE	1
CASP12	rhx2937	CARD	NLRP2	rhx1136	PYD	0.336993	FALSE	1
DTHD1	rhx1114	DD	NLRP2	rhx1136	PYD	-0.0757794	FALSE	1
UNC5A	rhx1115	DD	NLRP2	rhx1136	PYD	0.492003	FALSE	1
NLRP9	rhx1116	PYD	NLRP2	rhx1136	PYD	0.11468	FALSE	1
MAVS	rhx1117	CARD	NLRP2	rhx1136	PYD	0.106165	FALSE	1
FADD	rhx1899	DED	NLRP2	rhx1136	PYD	2.95557	FALSE	1
NLRP14	rhx1118	PYD	NLRP2	rhx1136	PYD	-0.215619	FALSE	1
NLRP13	rhx1119	PYD	NLRP2	rhx1136	PYD	0.0531515	FALSE	1
NLRP10	rhx1120	PYD	DDX58	rhx1884	2CARD	8.64184	TRUE	1
POP1	rhx1127	PYD	DDX58	rhx1884	2CARD	1.29428	FALSE	1
MALT1	rhx2115	DD	DDX58	rhx1884	2CARD	-0.0494269	FALSE	1
MADD	rhx2116	DD	DDX58	rhx1884	2CARD	-0.359261	FALSE	1
CASP10	rhx1129	2DED	DDX58	rhx1884	2CARD	-1.72211	FALSE	1
CASP9	rhx2117	CARD	DDX58	rhx1884	2CARD	1.61491	FALSE	1
DR3	rhx1130	DD	DDX58	rhx1884	2CARD	0.87555	FALSE	1
CARD9	rhx2137	CARD	DDX58	rhx1884	2CARD	3.82675	FALSE	1
NLRP10	rhx1120	PYD	NLRP2	rhx1136	PYD	-3.92877	FALSE	1
NLRP8	rhx1121	PYD	NLRP2	rhx1136	PYD	-0.332332	FALSE	1
UNC5CL	rhx1122	DD	NLRP2	rhx1136	PYD	0.667588	FALSE	1
UNC5B	rhx1123	DD	NLRP2	rhx1136	PYD	-0.122244	FALSE	1
DLG5	rhx1124	CARD	NLRP2	rhx1136	PYD	0.17145	FALSE	1
NLRP7	rhx1126	PYD	NLRP2	rhx1136	PYD	0.410836	FALSE	1
POP1	rhx1127	PYD	NLRP2	rhx1136	PYD	-0.0744712	FALSE	1
MALT1	rhx2115	DD	NLRP2	rhx1136	PYD	-0.817917	FALSE	1
DEDD2	rhx1128	DED	NLRP2	rhx1136	PYD	0.000752904	FALSE	1
MADD	rhx2116	DD	NLRP2	rhx1136	PYD	-0.128926	FALSE	1
CASP10	rhx1129	2DED	NLRP2	rhx1136	PYD	0.456138	FALSE	1
CASP9	rhx2117	CARD	NLRP2	rhx1136	PYD	0.0489602	FALSE	1
DR3	rhx1130	DD	NLRP2	rhx1136	PYD	1.49195	FALSE	1
CARD9	rhx2137	CARD	NLRP2	rhx1136	PYD	-0.861409	FALSE	1
THOC1	rhx1131	DD	NLRP2	rhx1136	PYD	0.427324	FALSE	1
BCL10	rhx2138	CARD	NLRP2	rhx1136	PYD	1.00678	FALSE	1
NLRP4	rhx1133	PYD	DDX58	rhx1884	2CARD	0.0878229	FALSE	1
CARD11	rhx2232	CARD	DDX58	rhx1884	2CARD	-0.189742	FALSE	1
CARD10	rhx1134	CARD	DDX58	rhx1884	2CARD	1.33234	FALSE	1
CARD6	rhx1135	CARD	DDX58	rhx1884	2CARD	1.70759	FALSE	1
NLRP2	rhx1136	PYD	DDX58	rhx1884	2CARD	1.06564	FALSE	1
NLRP1	rhx1138	CARD	DDX58	rhx1884	2CARD	-0.145204	FALSE	1
CARD19	rhx1132	CARD	NLRP2	rhx1136	PYD	-0.447356	FALSE	1
CARD11	rhx2230	CARD	NLRP2	rhx1136	PYD	0.692871	FALSE	1
NLRP4	rhx1133	PYD	NLRP2	rhx1136	PYD	-0.382051	FALSE	1
CARD11	rhx2232	CARD	NLRP2	rhx1136	PYD	-0.40565	FALSE	1
CARD10	rhx1134	CARD	NLRP2	rhx1136	PYD	4.0163	FALSE	1
CARD6	rhx1135	CARD	NLRP2	rhx1136	PYD	0.42016	FALSE	1
NLRP2	rhx1136	PYD	NLRP2	rhx1136	PYD	0.218484	FALSE	1
MDA5	rhx1137	2CARD	NLRP2	rhx1136	PYD	-0.836778	FALSE	1
NLRP1	rhx1138	CARD	NLRP2	rhx1136	PYD	-0.352697	FALSE	1
NLRP1	rhx1139	PYD	NLRP2	rhx1136	PYD	-0.0202203	FALSE	1
CARD9	rhx1140	CARD	NLRP2	rhx1136	PYD	1.01237	FALSE	1
PIDD1	rhx1141	DD	NLRP2	rhx1136	PYD	0.585968	FALSE	1
NLRC4	rhx1142	CARD	NLRP2	rhx1136	PYD	1.40195	FALSE	1
IRAK4	rhx1143	DD	NLRP2	rhx1136	PYD	0.1538	FALSE	1
APAF1	rhx0644	CARD	DDX58	rhx1884	2CARD	0.626086	FALSE	1
BCL10	rhx2409	CARD	DDX58	rhx1884	2CARD	1.09433	FALSE	1
none	rhx0935	NA	DDX58	rhx1884	2CARD	0.162394	FALSE	1
CARD14	rhx1144	CARD	NLRP2	rhx1136	PYD	4.31199	FALSE	1
EDAR	rhx1145	DD	NLRP2	rhx1136	PYD	-0.69339	FALSE	1
APAF1	rhx0644	CARD	NLRP2	rhx1136	PYD	0.731291	FALSE	1
CARD8	rhx1146	CARD	NLRP2	rhx1136	PYD	2.82466	FALSE	1
BCL10	rhx2409	CARD	NLRP2	rhx1136	PYD	2.22175	FALSE	1
NLRC5	rhx1174	CARD	NLRP2	rhx1136	PYD	-0.806227	FALSE	1
NLRC3	rhx1176	CARD	NLRP2	rhx1136	PYD	-0.780134	FALSE	1
FAS	rhx0653	DD	NLRP2	rhx1136	PYD	0.0211923	FALSE	1
none	rhx0935	NA	NLRP2	rhx1136	PYD	0.342049	FALSE	1
ASC	rhx0927	PYD, CARD	NLRP8	rhx1121	PYD	1.0264	FALSE	1
NLRP3	rhx0928	PYD	NLRP8	rhx1121	PYD	0.787415	FALSE	1
DR6	rhx1219	DD	NLRP8	rhx1121	PYD	-0.206425	FALSE	1
DR6	rhx1220	CARD	NLRP8	rhx1121	PYD	0.0381833	FALSE	1
ASC	rhx0988	PYD	NLRP8	rhx1121	PYD	1.31874	FALSE	1
ASC	rhx0989	CARD	NLRP8	rhx1121	PYD	0.528377	FALSE	1
LRRD1	rhx1033	DD	NLRP8	rhx1121	PYD	0.221556	FALSE	1
CRADD	rhx1223	CARD	NLRP8	rhx1121	PYD	-0.220606	FALSE	1
ANKDD1B	rhx2932	DD	NLRP8	rhx1121	PYD	-0.315123	FALSE	1
AIM2	rhx1052	PYD	NLRP8	rhx1121	PYD	2.14311	FALSE	1
CFLAR	rhx1053	2DED	NLRP8	rhx1121	PYD	0.680799	FALSE	1
QRICH1	rhx1229	CARD	NLRP8	rhx1121	PYD	1.61455	FALSE	1
Pyrin	rhx1054	PYD	NLRP8	rhx1121	PYD	0.781151	FALSE	1
IRAK2	rhx1055	DD	NLRP8	rhx1121	PYD	0.756797	FALSE	1
NOL3	rhx1056	CARD	NLRP8	rhx1121	PYD	0.615928	FALSE	1
DEDD	rhx2935	DED	NLRP8	rhx1121	PYD	1.01832	FALSE	1
UNC5C	rhx1060	DD	NLRP8	rhx1121	PYD	0.347557	FALSE	1
NGFR	rhx1062	DD	NLRP8	rhx1121	PYD	-1.0706	FALSE	1
ANK1	rhx1063	DD	NLRP8	rhx1121	PYD	1.8687	FALSE	1
CASP1	rhx1066	CARD	NLRP8	rhx1121	PYD	0.736535	FALSE	1
MYD88	rhx1311	DD, TIR	NLRP8	rhx1121	PYD	0.374802	FALSE	1
MNDA	rhx1067	PYD	NLRP8	rhx1121	PYD	0.424647	FALSE	1
FADD	rhx1312	DED, DD	NLRP8	rhx1121	PYD	3.27561	FALSE	1
CASP2	rhx1068	CARD	NLRP8	rhx1121	PYD	1.38916	FALSE	1
CASP8	rhx1313	2DED	NLRP8	rhx1121	PYD	0.712478	FALSE	1
CASP4	rhx1069	CARD	NLRP8	rhx1121	PYD	0.395039	FALSE	1
IRAK1	rhx1070	DD	NLRP8	rhx1121	PYD	0.947794	FALSE	1
DAPK1	rhx1072	DD	NLRP8	rhx1121	PYD	0.114197	FALSE	1
ICEBERG	rhx1073b	CARD	NLRP8	rhx1121	PYD	-0.981134	FALSE	1
NLRP6	rhx1074	PYD	NLRP8	rhx1121	PYD	0.671239	FALSE	1
NLRP12	rhx1076	PYD	NLRP8	rhx1121	PYD	2.17394	FALSE	1
NLRP5	rhx1077	PYD	NLRP8	rhx1121	PYD	1.10911	FALSE	1
CRADD	rhx1078	CARD, DD	NLRP8	rhx1121	PYD	-0.30146	FALSE	1
NFKB2	rhx1097	DD	NLRP8	rhx1121	PYD	-0.585704	FALSE	1
ANK2	rhx1098	DD	NLRP8	rhx1121	PYD	-0.757994	FALSE	1
ANK3	rhx1099	DD	NLRP8	rhx1121	PYD	-0.133423	FALSE	1
BIRC3	rhx1100	CARD	NLRP8	rhx1121	PYD	-0.342735	FALSE	1
BIRC2	rhx1101	CARD	NLRP8	rhx1121	PYD	-0.290371	FALSE	1
PEA15	rhx1102b	DED	NLRP8	rhx1121	PYD	-0.931975	FALSE	1
IFI16	rhx1103	PYD	NLRP8	rhx1121	PYD	0.202293	FALSE	1
ANKDD1A	rhx1105	DD	NLRP8	rhx1121	PYD	-0.587153	FALSE	1
POP2	rhx1106	PYD	NLRP8	rhx1121	PYD	0.787284	FALSE	1
COP1	rhx1107	CARD	NLRP8	rhx1121	PYD	0.606048	FALSE	1
CARD17	rhx1108	CARD	NLRP8	rhx1121	PYD	0.774513	FALSE	1
MAVS	rhx1379	CARD	NLRP8	rhx1121	PYD	0.23535	FALSE	1
IFIX	rhx1109	PYD	NLRP8	rhx1121	PYD	1.13771	FALSE	1
CASP12	rhx2937	CARD	NLRP8	rhx1121	PYD	0.111676	FALSE	1
DTHD1	rhx1114	DD	NLRP8	rhx1121	PYD	-0.152073	FALSE	1
UNC5A	rhx1115	DD	NLRP8	rhx1121	PYD	-0.0620004	FALSE	1
NLRP9	rhx1116	PYD	NLRP8	rhx1121	PYD	-0.0971734	FALSE	1
MAVS	rhx1117	CARD	NLRP8	rhx1121	PYD	0.26503	FALSE	1
FADD	rhx1899	DED	NLRP8	rhx1121	PYD	2.2964	FALSE	1
NLRP14	rhx1118	PYD	NLRP8	rhx1121	PYD	-0.910162	FALSE	1
NLRP13	rhx1119	PYD	NLRP8	rhx1121	PYD	-1.05524	FALSE	1
NLRP10	rhx1120	PYD	NLRP8	rhx1121	PYD	7.49619	TRUE	1
NLRP8	rhx1121	PYD	NLRP8	rhx1121	PYD	0.849834	FALSE	1
UNC5CL	rhx1122	DD	NLRP8	rhx1121	PYD	1.1059	FALSE	1
UNC5B	rhx1123	DD	NLRP8	rhx1121	PYD	-0.0589474	FALSE	1
DLG5	rhx1124	CARD	NLRP8	rhx1121	PYD	-0.293225	FALSE	1
NLRP7	rhx1126	PYD	NLRP8	rhx1121	PYD	0.20486	FALSE	1
POP1	rhx1127	PYD	NLRP8	rhx1121	PYD	0.346258	FALSE	1
MALT1	rhx2115	DD	NLRP8	rhx1121	PYD	-0.163735	FALSE	1
DEDD2	rhx1128	DED	NLRP8	rhx1121	PYD	0.422867	FALSE	1
MADD	rhx2116	DD	NLRP8	rhx1121	PYD	0.0233919	FALSE	1
CASP10	rhx1129	2DED	NLRP8	rhx1121	PYD	0.393991	FALSE	1
CASP9	rhx2117	CARD	NLRP8	rhx1121	PYD	0.175303	FALSE	1
DR3	rhx1130	DD	NLRP8	rhx1121	PYD	2.15331	FALSE	1
CARD9	rhx2137	CARD	NLRP8	rhx1121	PYD	-0.436097	FALSE	1
THOC1	rhx1131	DD	NLRP8	rhx1121	PYD	0.169162	FALSE	1
BCL10	rhx2138	CARD	NLRP8	rhx1121	PYD	1.14627	FALSE	1
CARD19	rhx1132	CARD	NLRP8	rhx1121	PYD	0.0570879	FALSE	1
NLRP4	rhx1133	PYD	NLRP8	rhx1121	PYD	0.150647	FALSE	1
CARD11	rhx2232	CARD	NLRP8	rhx1121	PYD	-0.377648	FALSE	1
CARD10	rhx1134	CARD	NLRP8	rhx1121	PYD	3.07891	FALSE	1
CARD6	rhx1135	CARD	NLRP8	rhx1121	PYD	0.531133	FALSE	1
NLRP2	rhx1136	PYD	NLRP8	rhx1121	PYD	1.094	FALSE	1
MDA5	rhx1137	2CARD	NLRP8	rhx1121	PYD	0.397324	FALSE	1
NLRP1	rhx1138	CARD	NLRP8	rhx1121	PYD	0.706798	FALSE	1
NLRP1	rhx1139	PYD	NLRP8	rhx1121	PYD	-0.0357992	FALSE	1
CARD9	rhx1140	CARD	NLRP8	rhx1121	PYD	1.71963	FALSE	1
PIDD1	rhx1141	DD	NLRP8	rhx1121	PYD	-0.0665957	FALSE	1
NLRC4	rhx1142	CARD	NLRP8	rhx1121	PYD	0.4126	FALSE	1
IRAK4	rhx1143	DD	NLRP8	rhx1121	PYD	0.505389	FALSE	1
CARD14	rhx1144	CARD	NLRP8	rhx1121	PYD	4.12539	FALSE	1
EDAR	rhx1145	DD	NLRP8	rhx1121	PYD	1.01736	FALSE	1
APAF1	rhx0644	CARD	NLRP8	rhx1121	PYD	-0.0551951	FALSE	1
CARD8	rhx1146	CARD	NLRP8	rhx1121	PYD	3.97897	FALSE	1
BCL10	rhx2409	CARD	NLRP8	rhx1121	PYD	1.49867	FALSE	1
NLRC5	rhx1174	CARD	NLRP8	rhx1121	PYD	-0.258615	FALSE	1
NLRC3	rhx1176	CARD	NLRP8	rhx1121	PYD	-0.162883	FALSE	1
FAS	rhx0653	DD	NLRP8	rhx1121	PYD	0.391152	FALSE	1
none	rhx0935	NA	NLRP8	rhx1121	PYD	-0.763469	FALSE	1
ASC	rhx0988	PYD	ASC	rhx0927	PYD, CARD	10.1682	TRUE	0
ASC	rhx0988	PYD	NLRP3	rhx0928	PYD	10.386	TRUE	0
ASC	rhx0988	PYD	DR6	rhx1220	CARD	-0.710636	FALSE	0
ASC	rhx0988	PYD	ASC	rhx0988	PYD	9.77605	TRUE	0
ASC	rhx0988	PYD	ASC	rhx0989	CARD	-0.160567	FALSE	0
ASC	rhx0988	PYD	LRRD1	rhx1033	DD	0.091634	FALSE	0
ASC	rhx0988	PYD	CRADD	rhx1223	CARD	-0.849811	FALSE	0
ASC	rhx0988	PYD	CRADD	rhx1224	DD	-0.741832	FALSE	0
ASC	rhx0988	PYD	TRAIL-R2	rhx1051	DD	-0.153818	FALSE	0
ASC	rhx0988	PYD	AIM2	rhx1052	PYD	10.1558	TRUE	0
ASC	rhx0988	PYD	CFLAR	rhx1053	2DED	8.13027	TRUE	0
ASC	rhx0988	PYD	QRICH1	rhx1229	CARD	0.158728	FALSE	0
ASC	rhx0988	PYD	Pyrin	rhx1054	PYD	10.4016	TRUE	0
ASC	rhx0988	PYD	IRAK2	rhx1055	DD	-0.583812	FALSE	0
ASC	rhx0988	PYD	NOL3	rhx1056	CARD	-0.22596	FALSE	0
ASC	rhx0988	PYD	UNC5C	rhx1060	DD	0.230702	FALSE	0
ASC	rhx0988	PYD	NGFR	rhx1062	DD	-0.0440316	FALSE	0
ASC	rhx0988	PYD	ANK1	rhx1063	DD	0.43955	FALSE	0
ASC	rhx0988	PYD	TNFR1	rhx1064	DD	0.23196	FALSE	0
ASC	rhx0988	PYD	CASP1	rhx1066	CARD	0.208444	FALSE	0
ASC	rhx0988	PYD	MYD88	rhx1311	DD, TIR	-0.198084	FALSE	0
ASC	rhx0988	PYD	MNDA	rhx1067	PYD	0.42688	FALSE	0
ASC	rhx0988	PYD	FADD	rhx1312	DED, DD	-0.569006	FALSE	0
ASC	rhx0988	PYD	CASP2	rhx1068	CARD	-0.407394	FALSE	0
ASC	rhx0988	PYD	CASP8	rhx1313	2DED	8.70133	TRUE	0
ASC	rhx0988	PYD	CASP4	rhx1069	CARD	-0.397414	FALSE	0
ASC	rhx0988	PYD	IRAK1	rhx1070	DD	0.0692252	FALSE	0
ASC	rhx0988	PYD	CASP5	rhx1071	CARD	0.309035	FALSE	0
ASC	rhx0988	PYD	DAPK1	rhx1072	DD	0.200776	FALSE	0
ASC	rhx0988	PYD	ICEBERG	rhx1073b	CARD	-0.0840683	FALSE	0
ASC	rhx0988	PYD	NLRP6	rhx1074	PYD	10.2658	TRUE	0
ASC	rhx0988	PYD	NLRP12	rhx1076	PYD	9.54018	TRUE	0
ASC	rhx0988	PYD	NLRP5	rhx1077	PYD	0.0491454	FALSE	0
ASC	rhx0988	PYD	CRADD	rhx1078	CARD, DD	1.0581	FALSE	0
ASC	rhx0988	PYD	NFKB2	rhx1097	DD	0.304948	FALSE	0
ASC	rhx0988	PYD	POP3	rhx1368	PYD	-0.506522	FALSE	0
ASC	rhx0988	PYD	ANK2	rhx1098	DD	0.037549	FALSE	0
ASC	rhx0988	PYD	ANK3	rhx1099	DD	0.193592	FALSE	0
ASC	rhx0988	PYD	BIRC3	rhx1100	CARD	0.191385	FALSE	0
ASC	rhx0988	PYD	BIRC2	rhx1101	CARD	-0.540163	FALSE	0
ASC	rhx0988	PYD	PEA15	rhx1102b	DED	0.170188	FALSE	0
ASC	rhx0988	PYD	IFI16	rhx1103	PYD	1.1656	FALSE	0
ASC	rhx0988	PYD	ANKDD1A	rhx1105	DD	0.0308007	FALSE	0
ASC	rhx0988	PYD	POP2	rhx1106	PYD	-0.359194	FALSE	0
ASC	rhx0988	PYD	COP1	rhx1107	CARD	0.559394	FALSE	0
ASC	rhx0988	PYD	CARD17	rhx1108	CARD	0.405617	FALSE	0
ASC	rhx0988	PYD	MAVS	rhx1379	CARD	-0.291646	FALSE	0
ASC	rhx0988	PYD	IFIX	rhx1109	PYD	0.194064	FALSE	0
ASC	rhx0988	PYD	UNC5D	rhx1113	DD	-0.0106851	FALSE	0
ASC	rhx0988	PYD	DTHD1	rhx1114	DD	0.0435932	FALSE	0
ASC	rhx0988	PYD	UNC5A	rhx1115	DD	-0.0852087	FALSE	0
ASC	rhx0988	PYD	NLRP9	rhx1116	PYD	0.361655	FALSE	0
ASC	rhx0988	PYD	MAVS	rhx1117	CARD	0.548114	FALSE	0
ASC	rhx0988	PYD	FADD	rhx1899	DED	-0.595816	FALSE	0
ASC	rhx0988	PYD	NLRP14	rhx1118	PYD	-0.00983975	FALSE	0
ASC	rhx0988	PYD	NLRP13	rhx1119	PYD	-0.610004	FALSE	0
ASC	rhx0988	PYD	NLRP10	rhx1120	PYD	9.79407	TRUE	0
ASC	rhx0988	PYD	UNC5CL	rhx1122	DD	0.539982	FALSE	0
ASC	rhx0988	PYD	UNC5B	rhx1123	DD	0.221545	FALSE	0
ASC	rhx0988	PYD	DLG5	rhx1124	CARD	0.448692	FALSE	0
ASC	rhx0988	PYD	EDARADD	rhx1125	DD	-0.266666	FALSE	0
ASC	rhx0988	PYD	NLRP7	rhx1126	PYD	-0.258212	FALSE	0
ASC	rhx0988	PYD	POP1	rhx1127	PYD	2.86126	FALSE	0
ASC	rhx0988	PYD	MALT1	rhx2115	DD	-0.575626	FALSE	0
ASC	rhx0988	PYD	DEDD2	rhx1128	DED	-0.243573	FALSE	0
ASC	rhx0988	PYD	MADD	rhx2116	DD	-0.079604	FALSE	0
ASC	rhx0988	PYD	CASP10	rhx1129	2DED	0.233553	FALSE	0
ASC	rhx0988	PYD	CASP9	rhx2117	CARD	-0.674149	FALSE	0
ASC	rhx0988	PYD	DR3	rhx1130	DD	-0.0701097	FALSE	0
ASC	rhx0988	PYD	CARD9	rhx2137	CARD	-0.451085	FALSE	0
ASC	rhx0988	PYD	THOC1	rhx1131	DD	-0.734103	FALSE	0
ASC	rhx0988	PYD	BCL10	rhx2138	CARD	-0.672586	FALSE	0
ASC	rhx0988	PYD	CARD19	rhx1132	CARD	0.111359	FALSE	0
ASC	rhx0988	PYD	CARD11	rhx2230	CARD	-0.0921751	FALSE	0
ASC	rhx0988	PYD	NLRP4	rhx1133	PYD	0.273746	FALSE	0
ASC	rhx0988	PYD	CARD11	rhx2232	CARD	-1.11637	FALSE	0
ASC	rhx0988	PYD	CARD10	rhx1134	CARD	-0.71318	FALSE	0
ASC	rhx0988	PYD	CARD6	rhx1135	CARD	0.271987	FALSE	0
ASC	rhx0988	PYD	MDA5	rhx1137	2CARD	-0.0499487	FALSE	0
ASC	rhx0988	PYD	NLRP1	rhx1138	CARD	-0.424576	FALSE	0
ASC	rhx0988	PYD	NLRP1	rhx1139	PYD	-0.241586	FALSE	0
ASC	rhx0988	PYD	CARD9	rhx1140	CARD	-0.538609	FALSE	0
ASC	rhx0988	PYD	PIDD1	rhx1141	DD	0.0694979	FALSE	0
ASC	rhx0988	PYD	NLRC4	rhx1142	CARD	0.129802	FALSE	0
ASC	rhx0988	PYD	IRAK4	rhx1143	DD	-0.711297	FALSE	0
ASC	rhx0988	PYD	CARD14	rhx1144	CARD	0.379106	FALSE	0
ASC	rhx0988	PYD	EDAR	rhx1145	DD	0.314911	FALSE	0
ASC	rhx0988	PYD	APAF1	rhx0644	CARD	-0.922467	FALSE	0
ASC	rhx0988	PYD	CARD8	rhx1146	CARD	-0.808082	FALSE	0
ASC	rhx0988	PYD	BCL10	rhx2409	CARD	-0.799197	FALSE	0
ASC	rhx0988	PYD	NLRC5	rhx1174	CARD	-0.250486	FALSE	0
ASC	rhx0988	PYD	NLRC3	rhx1176	CARD	-0.906296	FALSE	0
ASC	rhx0988	PYD	FAS	rhx0653	DD	-0.99609	FALSE	0
ASC	rhx0988	PYD	none	rhx0935	NA	-0.853464	FALSE	0
ASC	rhx0927	PYD, CARD	ASC	rhx0927	PYD, CARD	7.03113	TRUE	0
ASC	rhx0927	PYD, CARD	NLRP3	rhx0928	PYD	7.02722	TRUE	0
ASC	rhx0927	PYD, CARD	DR6	rhx1220	CARD	-0.0157783	FALSE	0
ASC	rhx0927	PYD, CARD	ASC	rhx0988	PYD	5.73434	TRUE	0
ASC	rhx0927	PYD, CARD	ASC	rhx0989	CARD	7.00521	TRUE	0
ASC	rhx0927	PYD, CARD	LRRD1	rhx1033	DD	-0.729293	FALSE	0
ASC	rhx0927	PYD, CARD	CRADD	rhx1223	CARD	-0.599492	FALSE	0
ASC	rhx0927	PYD, CARD	CRADD	rhx1224	DD	-0.31469	FALSE	0
ASC	rhx0927	PYD, CARD	TRAIL-R2	rhx1051	DD	0.0172452	FALSE	0
ASC	rhx0927	PYD, CARD	AIM2	rhx1052	PYD	7.04699	TRUE	0
ASC	rhx0927	PYD, CARD	CFLAR	rhx1053	2DED	5.86393	TRUE	0
ASC	rhx0927	PYD, CARD	QRICH1	rhx1229	CARD	-0.0548159	FALSE	0
ASC	rhx0927	PYD, CARD	Pyrin	rhx1054	PYD	7.02917	TRUE	0
ASC	rhx0927	PYD, CARD	IRAK2	rhx1055	DD	0.320156	FALSE	0
ASC	rhx0927	PYD, CARD	NOL3	rhx1056	CARD	0.272145	FALSE	0
ASC	rhx0927	PYD, CARD	UNC5C	rhx1060	DD	-0.743301	FALSE	0
ASC	rhx0927	PYD, CARD	NGFR	rhx1062	DD	0.313057	FALSE	0
ASC	rhx0927	PYD, CARD	ANK1	rhx1063	DD	-0.389373	FALSE	0
ASC	rhx0927	PYD, CARD	TNFR1	rhx1064	DD	-0.010307	FALSE	0
ASC	rhx0927	PYD, CARD	CASP1	rhx1066	CARD	7.05242	TRUE	0
ASC	rhx0927	PYD, CARD	MYD88	rhx1311	DD, TIR	0.142929	FALSE	0
ASC	rhx0927	PYD, CARD	MNDA	rhx1067	PYD	-0.236787	FALSE	0
ASC	rhx0927	PYD, CARD	FADD	rhx1312	DED, DD	-0.50846	FALSE	0
ASC	rhx0927	PYD, CARD	CASP2	rhx1068	CARD	-0.0999198	FALSE	0
ASC	rhx0927	PYD, CARD	CASP8	rhx1313	2DED	6.50926	TRUE	0
ASC	rhx0927	PYD, CARD	CASP4	rhx1069	CARD	-0.235684	FALSE	0
ASC	rhx0927	PYD, CARD	IRAK1	rhx1070	DD	-0.271758	FALSE	0
ASC	rhx0927	PYD, CARD	CASP5	rhx1071	CARD	0.416825	FALSE	0
ASC	rhx0927	PYD, CARD	DAPK1	rhx1072	DD	-0.0464863	FALSE	0
ASC	rhx0927	PYD, CARD	ICEBERG	rhx1073b	CARD	3.43345	FALSE	0
ASC	rhx0927	PYD, CARD	NLRP6	rhx1074	PYD	7.02881	TRUE	0
ASC	rhx0927	PYD, CARD	NLRP12	rhx1076	PYD	6.11422	TRUE	0
ASC	rhx0927	PYD, CARD	NLRP5	rhx1077	PYD	-0.399652	FALSE	0
ASC	rhx0927	PYD, CARD	CRADD	rhx1078	CARD, DD	-0.0600312	FALSE	0
ASC	rhx0927	PYD, CARD	NFKB2	rhx1097	DD	-0.0730011	FALSE	0
ASC	rhx0927	PYD, CARD	POP3	rhx1368	PYD	0.186278	FALSE	0
ASC	rhx0927	PYD, CARD	ANK2	rhx1098	DD	-0.203697	FALSE	0
ASC	rhx0927	PYD, CARD	ANK3	rhx1099	DD	-0.0583563	FALSE	0
ASC	rhx0927	PYD, CARD	BIRC3	rhx1100	CARD	-0.0752701	FALSE	0
ASC	rhx0927	PYD, CARD	BIRC2	rhx1101	CARD	-0.073591	FALSE	0
ASC	rhx0927	PYD, CARD	PEA15	rhx1102b	DED	-0.0807592	FALSE	0
ASC	rhx0927	PYD, CARD	IFI16	rhx1103	PYD	-0.113892	FALSE	0
ASC	rhx0927	PYD, CARD	ANKDD1A	rhx1105	DD	-0.611253	FALSE	0
ASC	rhx0927	PYD, CARD	POP2	rhx1106	PYD	0.064633	FALSE	0
ASC	rhx0927	PYD, CARD	COP1	rhx1107	CARD	7.01654	TRUE	0
ASC	rhx0927	PYD, CARD	CARD17	rhx1108	CARD	0.443484	FALSE	0
ASC	rhx0927	PYD, CARD	MAVS	rhx1379	CARD	-0.803987	FALSE	0
ASC	rhx0927	PYD, CARD	IFIX	rhx1109	PYD	0.0598186	FALSE	0
ASC	rhx0927	PYD, CARD	UNC5D	rhx1113	DD	-0.455861	FALSE	0
ASC	rhx0927	PYD, CARD	DTHD1	rhx1114	DD	-0.323948	FALSE	0
ASC	rhx0927	PYD, CARD	UNC5A	rhx1115	DD	-0.0381329	FALSE	0
ASC	rhx0927	PYD, CARD	NLRP9	rhx1116	PYD	-0.523391	FALSE	0
ASC	rhx0927	PYD, CARD	MAVS	rhx1117	CARD	0.333674	FALSE	0
ASC	rhx0927	PYD, CARD	FADD	rhx1899	DED	-0.587533	FALSE	0
ASC	rhx0927	PYD, CARD	NLRP14	rhx1118	PYD	-0.75548	FALSE	0
ASC	rhx0927	PYD, CARD	NLRP13	rhx1119	PYD	-0.89613	FALSE	0
ASC	rhx0927	PYD, CARD	NLRP10	rhx1120	PYD	6.78629	TRUE	0
ASC	rhx0927	PYD, CARD	UNC5CL	rhx1122	DD	0.126316	FALSE	0
ASC	rhx0927	PYD, CARD	UNC5B	rhx1123	DD	-0.205835	FALSE	0
ASC	rhx0927	PYD, CARD	DLG5	rhx1124	CARD	0.00320277	FALSE	0
ASC	rhx0927	PYD, CARD	EDARADD	rhx1125	DD	-0.0377612	FALSE	0
ASC	rhx0927	PYD, CARD	NLRP7	rhx1126	PYD	0.130495	FALSE	0
ASC	rhx0927	PYD, CARD	POP1	rhx1127	PYD	0.151803	FALSE	0
ASC	rhx0927	PYD, CARD	MALT1	rhx2115	DD	-0.0434058	FALSE	0
ASC	rhx0927	PYD, CARD	DEDD2	rhx1128	DED	-0.388008	FALSE	0
ASC	rhx0927	PYD, CARD	MADD	rhx2116	DD	0.516571	FALSE	0
ASC	rhx0927	PYD, CARD	CASP10	rhx1129	2DED	-0.366633	FALSE	0
ASC	rhx0927	PYD, CARD	CASP9	rhx2117	CARD	-0.221465	FALSE	0
ASC	rhx0927	PYD, CARD	DR3	rhx1130	DD	-0.80796	FALSE	0
ASC	rhx0927	PYD, CARD	CARD9	rhx2137	CARD	-0.185622	FALSE	0
ASC	rhx0927	PYD, CARD	THOC1	rhx1131	DD	-0.185867	FALSE	0
ASC	rhx0927	PYD, CARD	BCL10	rhx2138	CARD	-0.332489	FALSE	0
ASC	rhx0927	PYD, CARD	CARD19	rhx1132	CARD	0.220174	FALSE	0
ASC	rhx0927	PYD, CARD	CARD11	rhx2230	CARD	-0.179433	FALSE	0
ASC	rhx0927	PYD, CARD	NLRP4	rhx1133	PYD	-0.466816	FALSE	0
ASC	rhx0927	PYD, CARD	CARD11	rhx2232	CARD	-0.62407	FALSE	0
ASC	rhx0927	PYD, CARD	CARD10	rhx1134	CARD	-0.59512	FALSE	0
ASC	rhx0927	PYD, CARD	CARD6	rhx1135	CARD	-0.898812	FALSE	0
ASC	rhx0927	PYD, CARD	MDA5	rhx1137	2CARD	0.137575	FALSE	0
ASC	rhx0927	PYD, CARD	NLRP1	rhx1138	CARD	1.30335	FALSE	0
ASC	rhx0927	PYD, CARD	NLRP1	rhx1139	PYD	-0.248683	FALSE	0
ASC	rhx0927	PYD, CARD	CARD9	rhx1140	CARD	-0.355888	FALSE	0
ASC	rhx0927	PYD, CARD	PIDD1	rhx1141	DD	-0.386598	FALSE	0
ASC	rhx0927	PYD, CARD	NLRC4	rhx1142	CARD	7.04019	TRUE	0
ASC	rhx0927	PYD, CARD	IRAK4	rhx1143	DD	0.22248	FALSE	0
ASC	rhx0927	PYD, CARD	CARD14	rhx1144	CARD	0.372892	FALSE	0
ASC	rhx0927	PYD, CARD	EDAR	rhx1145	DD	0.0181877	FALSE	0
ASC	rhx0927	PYD, CARD	APAF1	rhx0644	CARD	-0.129585	FALSE	0
ASC	rhx0927	PYD, CARD	CARD8	rhx1146	CARD	0.270792	FALSE	0
ASC	rhx0927	PYD, CARD	BCL10	rhx2409	CARD	-0.244141	FALSE	0
ASC	rhx0927	PYD, CARD	NLRC5	rhx1174	CARD	-0.303379	FALSE	0
ASC	rhx0927	PYD, CARD	NLRC3	rhx1176	CARD	-0.829675	FALSE	0
ASC	rhx0927	PYD, CARD	FAS	rhx0653	DD	-0.448196	FALSE	0
ASC	rhx0927	PYD, CARD	none	rhx0935	NA	-0.793942	FALSE	0
NLRP3	rhx0928	PYD	ASC	rhx0927	PYD, CARD	6.64493	TRUE	0
NLRP3	rhx0928	PYD	NLRP3	rhx0928	PYD	7.61844	TRUE	0
NLRP3	rhx0928	PYD	DR6	rhx1220	CARD	-0.372333	FALSE	0
NLRP3	rhx0928	PYD	ASC	rhx0988	PYD	7.00009	TRUE	0
NLRP3	rhx0928	PYD	ASC	rhx0989	CARD	-0.473123	FALSE	0
NLRP3	rhx0928	PYD	LRRD1	rhx1033	DD	-0.734622	FALSE	0
NLRP3	rhx0928	PYD	CRADD	rhx1223	CARD	-1.00005	FALSE	0
NLRP3	rhx0928	PYD	CRADD	rhx1224	DD	-0.491017	FALSE	0
NLRP3	rhx0928	PYD	TRAIL-R2	rhx1051	DD	0.179273	FALSE	0
NLRP3	rhx0928	PYD	AIM2	rhx1052	PYD	6.60983	TRUE	0
NLRP3	rhx0928	PYD	CFLAR	rhx1053	2DED	0.455741	FALSE	0
NLRP3	rhx0928	PYD	QRICH1	rhx1229	CARD	-0.270999	FALSE	0
NLRP3	rhx0928	PYD	Pyrin	rhx1054	PYD	6.52814	TRUE	0
NLRP3	rhx0928	PYD	IRAK2	rhx1055	DD	0.704443	FALSE	0
NLRP3	rhx0928	PYD	NOL3	rhx1056	CARD	0.812013	FALSE	0
NLRP3	rhx0928	PYD	UNC5C	rhx1060	DD	-0.663922	FALSE	0
NLRP3	rhx0928	PYD	NGFR	rhx1062	DD	-0.0450325	FALSE	0
NLRP3	rhx0928	PYD	ANK1	rhx1063	DD	-0.664142	FALSE	0
NLRP3	rhx0928	PYD	TNFR1	rhx1064	DD	-0.32937	FALSE	0
NLRP3	rhx0928	PYD	CASP1	rhx1066	CARD	0.197157	FALSE	0
NLRP3	rhx0928	PYD	MYD88	rhx1311	DD, TIR	-0.82593	FALSE	0
NLRP3	rhx0928	PYD	MNDA	rhx1067	PYD	0.270025	FALSE	0
NLRP3	rhx0928	PYD	FADD	rhx1312	DED, DD	-0.438336	FALSE	0
NLRP3	rhx0928	PYD	CASP2	rhx1068	CARD	-0.0677496	FALSE	0
NLRP3	rhx0928	PYD	CASP8	rhx1313	2DED	0.0200222	FALSE	0
NLRP3	rhx0928	PYD	CASP4	rhx1069	CARD	0.208905	FALSE	0
NLRP3	rhx0928	PYD	IRAK1	rhx1070	DD	-0.339069	FALSE	0
NLRP3	rhx0928	PYD	CASP5	rhx1071	CARD	0.272667	FALSE	0
NLRP3	rhx0928	PYD	DAPK1	rhx1072	DD	1.22082	FALSE	0
NLRP3	rhx0928	PYD	ICEBERG	rhx1073b	CARD	0.159717	FALSE	0
NLRP3	rhx0928	PYD	NLRP6	rhx1074	PYD	6.47711	TRUE	0
NLRP3	rhx0928	PYD	NLRP12	rhx1076	PYD	6.26246	TRUE	0
NLRP3	rhx0928	PYD	NLRP5	rhx1077	PYD	-0.833366	FALSE	0
NLRP3	rhx0928	PYD	CRADD	rhx1078	CARD, DD	-0.175095	FALSE	0
NLRP3	rhx0928	PYD	NFKB2	rhx1097	DD	0.135109	FALSE	0
NLRP3	rhx0928	PYD	POP3	rhx1368	PYD	0.0718869	FALSE	0
NLRP3	rhx0928	PYD	ANK2	rhx1098	DD	-0.162771	FALSE	0
NLRP3	rhx0928	PYD	ANK3	rhx1099	DD	0.0294968	FALSE	0
NLRP3	rhx0928	PYD	BIRC3	rhx1100	CARD	0.673625	FALSE	0
NLRP3	rhx0928	PYD	BIRC2	rhx1101	CARD	0.269649	FALSE	0
NLRP3	rhx0928	PYD	PEA15	rhx1102b	DED	-0.246744	FALSE	0
NLRP3	rhx0928	PYD	IFI16	rhx1103	PYD	0.542823	FALSE	0
NLRP3	rhx0928	PYD	ANKDD1A	rhx1105	DD	0.337478	FALSE	0
NLRP3	rhx0928	PYD	POP2	rhx1106	PYD	-0.157791	FALSE	0
NLRP3	rhx0928	PYD	COP1	rhx1107	CARD	0.31071	FALSE	0
NLRP3	rhx0928	PYD	CARD17	rhx1108	CARD	0.426017	FALSE	0
NLRP3	rhx0928	PYD	MAVS	rhx1379	CARD	0.00452504	FALSE	0
NLRP3	rhx0928	PYD	IFIX	rhx1109	PYD	0.460059	FALSE	0
NLRP3	rhx0928	PYD	UNC5D	rhx1113	DD	-0.437504	FALSE	0
NLRP3	rhx0928	PYD	DTHD1	rhx1114	DD	-0.102865	FALSE	0
NLRP3	rhx0928	PYD	UNC5A	rhx1115	DD	0.216117	FALSE	0
NLRP3	rhx0928	PYD	NLRP9	rhx1116	PYD	-0.173392	FALSE	0
NLRP3	rhx0928	PYD	MAVS	rhx1117	CARD	0.826425	FALSE	0
NLRP3	rhx0928	PYD	FADD	rhx1899	DED	0.115485	FALSE	0
NLRP3	rhx0928	PYD	NLRP14	rhx1118	PYD	-0.112614	FALSE	0
NLRP3	rhx0928	PYD	NLRP13	rhx1119	PYD	0.148349	FALSE	0
NLRP3	rhx0928	PYD	NLRP10	rhx1120	PYD	-0.301744	FALSE	0
NLRP3	rhx0928	PYD	UNC5CL	rhx1122	DD	0.871767	FALSE	0
NLRP3	rhx0928	PYD	UNC5B	rhx1123	DD	-0.011688	FALSE	0
NLRP3	rhx0928	PYD	DLG5	rhx1124	CARD	0.143632	FALSE	0
NLRP3	rhx0928	PYD	EDARADD	rhx1125	DD	-0.290861	FALSE	0
NLRP3	rhx0928	PYD	NLRP7	rhx1126	PYD	-0.420987	FALSE	0
NLRP3	rhx0928	PYD	POP1	rhx1127	PYD	-0.184676	FALSE	0
NLRP3	rhx0928	PYD	MALT1	rhx2115	DD	0.108105	FALSE	0
NLRP3	rhx0928	PYD	DEDD2	rhx1128	DED	-0.702432	FALSE	0
NLRP3	rhx0928	PYD	MADD	rhx2116	DD	0.329592	FALSE	0
NLRP3	rhx0928	PYD	CASP10	rhx1129	2DED	0.663144	FALSE	0
NLRP3	rhx0928	PYD	CASP9	rhx2117	CARD	-0.387649	FALSE	0
NLRP3	rhx0928	PYD	DR3	rhx1130	DD	-0.156228	FALSE	0
NLRP3	rhx0928	PYD	CARD9	rhx2137	CARD	-0.403483	FALSE	0
NLRP3	rhx0928	PYD	THOC1	rhx1131	DD	-0.159501	FALSE	0
NLRP3	rhx0928	PYD	BCL10	rhx2138	CARD	-0.695259	FALSE	0
NLRP3	rhx0928	PYD	CARD19	rhx1132	CARD	-0.154324	FALSE	0
NLRP3	rhx0928	PYD	CARD11	rhx2230	CARD	-0.103514	FALSE	0
NLRP3	rhx0928	PYD	NLRP4	rhx1133	PYD	0.106346	FALSE	0
NLRP3	rhx0928	PYD	CARD11	rhx2232	CARD	0.0663365	FALSE	0
NLRP3	rhx0928	PYD	CARD10	rhx1134	CARD	-0.864426	FALSE	0
NLRP3	rhx0928	PYD	CARD6	rhx1135	CARD	-0.629917	FALSE	0
NLRP3	rhx0928	PYD	MDA5	rhx1137	2CARD	0.138394	FALSE	0
NLRP3	rhx0928	PYD	NLRP1	rhx1138	CARD	-0.139767	FALSE	0
NLRP3	rhx0928	PYD	NLRP1	rhx1139	PYD	-0.283198	FALSE	0
NLRP3	rhx0928	PYD	CARD9	rhx1140	CARD	-0.584825	FALSE	0
NLRP3	rhx0928	PYD	PIDD1	rhx1141	DD	0.700181	FALSE	0
NLRP3	rhx0928	PYD	NLRC4	rhx1142	CARD	-0.198429	FALSE	0
NLRP3	rhx0928	PYD	IRAK4	rhx1143	DD	-0.250833	FALSE	0
NLRP3	rhx0928	PYD	CARD14	rhx1144	CARD	0.133864	FALSE	0
NLRP3	rhx0928	PYD	EDAR	rhx1145	DD	0.193846	FALSE	0
NLRP3	rhx0928	PYD	APAF1	rhx0644	CARD	0.39398	FALSE	0
NLRP3	rhx0928	PYD	CARD8	rhx1146	CARD	-0.289359	FALSE	0
NLRP3	rhx0928	PYD	BCL10	rhx2409	CARD	-0.2113	FALSE	0
NLRP3	rhx0928	PYD	NLRC5	rhx1174	CARD	-0.14925	FALSE	0
NLRP3	rhx0928	PYD	NLRC3	rhx1176	CARD	0.125419	FALSE	0
NLRP3	rhx0928	PYD	FAS	rhx0653	DD	-0.242443	FALSE	0
NLRP3	rhx0928	PYD	none	rhx0935	NA	-0.820675	FALSE	0
ASC	rhx0989	CARD	ASC	rhx0927	PYD, CARD	7.56165	TRUE	0
ASC	rhx0989	CARD	NLRP3	rhx0928	PYD	-0.304269	FALSE	0
ASC	rhx0989	CARD	DR6	rhx1220	CARD	-0.313283	FALSE	0
ASC	rhx0989	CARD	ASC	rhx0988	PYD	-0.404644	FALSE	0
ASC	rhx0989	CARD	ASC	rhx0989	CARD	7.63996	TRUE	0
ASC	rhx0989	CARD	LRRD1	rhx1033	DD	-0.913727	FALSE	0
ASC	rhx0989	CARD	CRADD	rhx1223	CARD	-0.572073	FALSE	0
ASC	rhx0989	CARD	CRADD	rhx1224	DD	-0.874762	FALSE	0
LRRD1	rhx1033	DD	ASC	rhx0927	PYD, CARD	-0.892277	FALSE	0
LRRD1	rhx1033	DD	NLRP3	rhx0928	PYD	-0.871062	FALSE	0
LRRD1	rhx1033	DD	DR6	rhx1220	CARD	-0.890773	FALSE	0
LRRD1	rhx1033	DD	ASC	rhx0988	PYD	-1.20899	FALSE	0
LRRD1	rhx1033	DD	ASC	rhx0989	CARD	-0.891238	FALSE	0
LRRD1	rhx1033	DD	LRRD1	rhx1033	DD	-0.514734	FALSE	0
LRRD1	rhx1033	DD	CRADD	rhx1223	CARD	-0.509035	FALSE	0
LRRD1	rhx1033	DD	CRADD	rhx1224	DD	-0.423333	FALSE	0
ASC	rhx0989	CARD	TRAIL-R2	rhx1051	DD	-0.368495	FALSE	0
ASC	rhx0989	CARD	AIM2	rhx1052	PYD	-0.521517	FALSE	0
ASC	rhx0989	CARD	CFLAR	rhx1053	2DED	-0.190432	FALSE	0
ASC	rhx0989	CARD	QRICH1	rhx1229	CARD	-0.263073	FALSE	0
ASC	rhx0989	CARD	Pyrin	rhx1054	PYD	-0.0017914	FALSE	0
ASC	rhx0989	CARD	IRAK2	rhx1055	DD	1.1677	FALSE	0
ASC	rhx0989	CARD	NOL3	rhx1056	CARD	1.10105	FALSE	0
ASC	rhx0989	CARD	UNC5C	rhx1060	DD	0.0625342	FALSE	0
ASC	rhx0989	CARD	NGFR	rhx1062	DD	-0.620628	FALSE	0
LRRD1	rhx1033	DD	TRAIL-R2	rhx1051	DD	-0.670546	FALSE	0
LRRD1	rhx1033	DD	AIM2	rhx1052	PYD	-0.247233	FALSE	0
LRRD1	rhx1033	DD	CFLAR	rhx1053	2DED	-0.418822	FALSE	0
LRRD1	rhx1033	DD	QRICH1	rhx1229	CARD	0.379446	FALSE	0
LRRD1	rhx1033	DD	Pyrin	rhx1054	PYD	-0.0704268	FALSE	0
LRRD1	rhx1033	DD	IRAK2	rhx1055	DD	-0.640854	FALSE	0
LRRD1	rhx1033	DD	NOL3	rhx1056	CARD	-0.600097	FALSE	0
LRRD1	rhx1033	DD	UNC5C	rhx1060	DD	-0.403412	FALSE	0
LRRD1	rhx1033	DD	NGFR	rhx1062	DD	0.22483	FALSE	0
ASC	rhx0989	CARD	ANK1	rhx1063	DD	-0.165193	FALSE	0
ASC	rhx0989	CARD	TNFR1	rhx1064	DD	-0.542877	FALSE	0
ASC	rhx0989	CARD	CASP1	rhx1066	CARD	7.69175	TRUE	0
ASC	rhx0989	CARD	MYD88	rhx1311	DD, TIR	-0.33727	FALSE	0
ASC	rhx0989	CARD	MNDA	rhx1067	PYD	-0.132182	FALSE	0
ASC	rhx0989	CARD	FADD	rhx1312	DED, DD	-0.00378987	FALSE	0
ASC	rhx0989	CARD	CASP2	rhx1068	CARD	-0.0592803	FALSE	0
ASC	rhx0989	CARD	CASP8	rhx1313	2DED	0.302103	FALSE	0
ASC	rhx0989	CARD	CASP4	rhx1069	CARD	0.780023	FALSE	0
ASC	rhx0989	CARD	IRAK1	rhx1070	DD	0.0405242	FALSE	0
ASC	rhx0989	CARD	CASP5	rhx1071	CARD	0.0918884	FALSE	0
ASC	rhx0989	CARD	DAPK1	rhx1072	DD	1.28626	FALSE	0
ASC	rhx0989	CARD	ICEBERG	rhx1073b	CARD	5.99705	TRUE	0
ASC	rhx0989	CARD	NLRP6	rhx1074	PYD	-0.85068	FALSE	0
LRRD1	rhx1033	DD	ANK1	rhx1063	DD	0.403939	FALSE	0
LRRD1	rhx1033	DD	TNFR1	rhx1064	DD	-0.119275	FALSE	0
LRRD1	rhx1033	DD	CASP1	rhx1066	CARD	-0.447773	FALSE	0
LRRD1	rhx1033	DD	MYD88	rhx1311	DD, TIR	0.408569	FALSE	0
LRRD1	rhx1033	DD	MNDA	rhx1067	PYD	-0.109767	FALSE	0
LRRD1	rhx1033	DD	FADD	rhx1312	DED, DD	-0.549083	FALSE	0
LRRD1	rhx1033	DD	CASP2	rhx1068	CARD	-0.451532	FALSE	0
LRRD1	rhx1033	DD	CASP8	rhx1313	2DED	-0.373594	FALSE	0
LRRD1	rhx1033	DD	CASP4	rhx1069	CARD	-0.516478	FALSE	0
LRRD1	rhx1033	DD	IRAK1	rhx1070	DD	-0.563031	FALSE	0
LRRD1	rhx1033	DD	CASP5	rhx1071	CARD	-0.621876	FALSE	0
LRRD1	rhx1033	DD	DAPK1	rhx1072	DD	-0.339395	FALSE	0
LRRD1	rhx1033	DD	ICEBERG	rhx1073b	CARD	-0.487808	FALSE	0
LRRD1	rhx1033	DD	NLRP6	rhx1074	PYD	-0.2738	FALSE	0
ASC	rhx0989	CARD	NLRP12	rhx1076	PYD	-0.281936	FALSE	0
ASC	rhx0989	CARD	NLRP5	rhx1077	PYD	0.0414003	FALSE	0
ASC	rhx0989	CARD	CRADD	rhx1078	CARD, DD	0.163043	FALSE	0
ASC	rhx0989	CARD	NFKB2	rhx1097	DD	0.34765	FALSE	0
ASC	rhx0989	CARD	POP3	rhx1368	PYD	0.324041	FALSE	0
ASC	rhx0989	CARD	ANK2	rhx1098	DD	-0.0728342	FALSE	0
ASC	rhx0989	CARD	ANK3	rhx1099	DD	0.201063	FALSE	0
ASC	rhx0989	CARD	BIRC3	rhx1100	CARD	-0.0445801	FALSE	0
ASC	rhx0989	CARD	BIRC2	rhx1101	CARD	0.330706	FALSE	0
ASC	rhx0989	CARD	PEA15	rhx1102b	DED	-0.162626	FALSE	0
ASC	rhx0989	CARD	IFI16	rhx1103	PYD	-0.12793	FALSE	0
ASC	rhx0989	CARD	ANKDD1A	rhx1105	DD	-1.05904	FALSE	0
LRRD1	rhx1033	DD	NLRP12	rhx1076	PYD	0.539818	FALSE	0
LRRD1	rhx1033	DD	NLRP5	rhx1077	PYD	-0.0402054	FALSE	0
LRRD1	rhx1033	DD	CRADD	rhx1078	CARD, DD	0.503565	FALSE	0
LRRD1	rhx1033	DD	NFKB2	rhx1097	DD	0.140787	FALSE	0
LRRD1	rhx1033	DD	POP3	rhx1368	PYD	-0.304938	FALSE	0
LRRD1	rhx1033	DD	ANK2	rhx1098	DD	-0.121673	FALSE	0
LRRD1	rhx1033	DD	ANK3	rhx1099	DD	-0.485784	FALSE	0
LRRD1	rhx1033	DD	BIRC3	rhx1100	CARD	-0.644233	FALSE	0
LRRD1	rhx1033	DD	BIRC2	rhx1101	CARD	-0.836436	FALSE	0
LRRD1	rhx1033	DD	PEA15	rhx1102b	DED	-0.669903	FALSE	0
LRRD1	rhx1033	DD	IFI16	rhx1103	PYD	1.47171	FALSE	0
LRRD1	rhx1033	DD	ANKDD1A	rhx1105	DD	-0.263732	FALSE	0
ASC	rhx0989	CARD	POP2	rhx1106	PYD	0.239471	FALSE	0
ASC	rhx0989	CARD	COP1	rhx1107	CARD	7.65939	TRUE	0
ASC	rhx0989	CARD	CARD17	rhx1108	CARD	1.71111	FALSE	0
ASC	rhx0989	CARD	MAVS	rhx1379	CARD	0.809668	FALSE	0
ASC	rhx0989	CARD	IFIX	rhx1109	PYD	0.483489	FALSE	0
ASC	rhx0989	CARD	UNC5D	rhx1113	DD	-0.0801825	FALSE	0
ASC	rhx0989	CARD	DTHD1	rhx1114	DD	0.155767	FALSE	0
ASC	rhx0989	CARD	UNC5A	rhx1115	DD	0.414717	FALSE	0
ASC	rhx0989	CARD	NLRP9	rhx1116	PYD	0.0516185	FALSE	0
ASC	rhx0989	CARD	MAVS	rhx1117	CARD	0.904723	FALSE	0
ASC	rhx0989	CARD	FADD	rhx1899	DED	-0.267465	FALSE	0
ASC	rhx0989	CARD	NLRP14	rhx1118	PYD	-0.739338	FALSE	0
ASC	rhx0989	CARD	NLRP13	rhx1119	PYD	-0.214144	FALSE	0
LRRD1	rhx1033	DD	POP2	rhx1106	PYD	0.769121	FALSE	0
LRRD1	rhx1033	DD	COP1	rhx1107	CARD	0.470242	FALSE	0
LRRD1	rhx1033	DD	CARD17	rhx1108	CARD	1.25723	FALSE	0
LRRD1	rhx1033	DD	MAVS	rhx1379	CARD	0.269251	FALSE	0
LRRD1	rhx1033	DD	IFIX	rhx1109	PYD	0.522472	FALSE	0
LRRD1	rhx1033	DD	UNC5D	rhx1113	DD	-0.0947965	FALSE	0
LRRD1	rhx1033	DD	DTHD1	rhx1114	DD	-0.188267	FALSE	0
LRRD1	rhx1033	DD	UNC5A	rhx1115	DD	-0.506181	FALSE	0
LRRD1	rhx1033	DD	NLRP9	rhx1116	PYD	-0.343562	FALSE	0
LRRD1	rhx1033	DD	MAVS	rhx1117	CARD	1.23077	FALSE	0
LRRD1	rhx1033	DD	FADD	rhx1899	DED	-0.469313	FALSE	0
LRRD1	rhx1033	DD	NLRP14	rhx1118	PYD	-0.25377	FALSE	0
LRRD1	rhx1033	DD	NLRP13	rhx1119	PYD	0.135205	FALSE	0
ASC	rhx0989	CARD	NLRP10	rhx1120	PYD	-0.049064	FALSE	0
ASC	rhx0989	CARD	UNC5CL	rhx1122	DD	0.108575	FALSE	0
ASC	rhx0989	CARD	UNC5B	rhx1123	DD	-0.0853664	FALSE	0
ASC	rhx0989	CARD	DLG5	rhx1124	CARD	0.129041	FALSE	0
ASC	rhx0989	CARD	EDARADD	rhx1125	DD	0.0788414	FALSE	0
ASC	rhx0989	CARD	NLRP7	rhx1126	PYD	0.384417	FALSE	0
ASC	rhx0989	CARD	POP1	rhx1127	PYD	-0.0504415	FALSE	0
ASC	rhx0989	CARD	MALT1	rhx2115	DD	-0.0287331	FALSE	0
ASC	rhx0989	CARD	DEDD2	rhx1128	DED	-0.478952	FALSE	0
ASC	rhx0989	CARD	MADD	rhx2116	DD	-0.110643	FALSE	0
ASC	rhx0989	CARD	CASP10	rhx1129	2DED	0.179967	FALSE	0
ASC	rhx0989	CARD	CASP9	rhx2117	CARD	0.405382	FALSE	0
ASC	rhx0989	CARD	DR3	rhx1130	DD	-0.646387	FALSE	0
ASC	rhx0989	CARD	CARD9	rhx2137	CARD	0.0636365	FALSE	0
ASC	rhx0989	CARD	THOC1	rhx1131	DD	-0.925064	FALSE	0
ASC	rhx0989	CARD	BCL10	rhx2138	CARD	-0.262211	FALSE	0
LRRD1	rhx1033	DD	NLRP10	rhx1120	PYD	0.881517	FALSE	0
LRRD1	rhx1033	DD	UNC5CL	rhx1122	DD	2.26268	FALSE	0
LRRD1	rhx1033	DD	UNC5B	rhx1123	DD	0.462996	FALSE	0
LRRD1	rhx1033	DD	DLG5	rhx1124	CARD	0.188747	FALSE	0
LRRD1	rhx1033	DD	EDARADD	rhx1125	DD	0.267794	FALSE	0
LRRD1	rhx1033	DD	NLRP7	rhx1126	PYD	0.170731	FALSE	0
LRRD1	rhx1033	DD	POP1	rhx1127	PYD	-0.183604	FALSE	0
LRRD1	rhx1033	DD	MALT1	rhx2115	DD	-0.142885	FALSE	0
LRRD1	rhx1033	DD	DEDD2	rhx1128	DED	-0.39724	FALSE	0
LRRD1	rhx1033	DD	MADD	rhx2116	DD	-0.0920838	FALSE	0
LRRD1	rhx1033	DD	CASP10	rhx1129	2DED	2.55875	FALSE	0
LRRD1	rhx1033	DD	CASP9	rhx2117	CARD	-0.342802	FALSE	0
LRRD1	rhx1033	DD	DR3	rhx1130	DD	0.00350499	FALSE	0
LRRD1	rhx1033	DD	CARD9	rhx2137	CARD	0.0886371	FALSE	0
LRRD1	rhx1033	DD	THOC1	rhx1131	DD	0.580423	FALSE	0
LRRD1	rhx1033	DD	BCL10	rhx2138	CARD	0.765322	FALSE	0
ASC	rhx0989	CARD	CARD19	rhx1132	CARD	0.304404	FALSE	0
ASC	rhx0989	CARD	CARD11	rhx2230	CARD	0.159919	FALSE	0
ASC	rhx0989	CARD	NLRP4	rhx1133	PYD	0.0621114	FALSE	0
ASC	rhx0989	CARD	CARD11	rhx2232	CARD	-0.4704	FALSE	0
ASC	rhx0989	CARD	CARD10	rhx1134	CARD	-0.299099	FALSE	0
ASC	rhx0989	CARD	CARD6	rhx1135	CARD	-0.332427	FALSE	0
ASC	rhx0989	CARD	MDA5	rhx1137	2CARD	0.12997	FALSE	0
ASC	rhx0989	CARD	NLRP1	rhx1138	CARD	1.47307	FALSE	0
ASC	rhx0989	CARD	NLRP1	rhx1139	PYD	0.0378901	FALSE	0
ASC	rhx0989	CARD	CARD9	rhx1140	CARD	-0.551361	FALSE	0
ASC	rhx0989	CARD	PIDD1	rhx1141	DD	-0.113131	FALSE	0
ASC	rhx0989	CARD	NLRC4	rhx1142	CARD	7.67137	TRUE	0
ASC	rhx0989	CARD	IRAK4	rhx1143	DD	-0.450607	FALSE	0
LRRD1	rhx1033	DD	CARD19	rhx1132	CARD	1.44961	FALSE	0
LRRD1	rhx1033	DD	CARD11	rhx2230	CARD	1.11899	FALSE	0
LRRD1	rhx1033	DD	NLRP4	rhx1133	PYD	0.904419	FALSE	0
LRRD1	rhx1033	DD	CARD11	rhx2232	CARD	0.565081	FALSE	0
LRRD1	rhx1033	DD	CARD10	rhx1134	CARD	0.619321	FALSE	0
LRRD1	rhx1033	DD	CARD6	rhx1135	CARD	0.458844	FALSE	0
LRRD1	rhx1033	DD	MDA5	rhx1137	2CARD	0.172889	FALSE	0
LRRD1	rhx1033	DD	NLRP1	rhx1138	CARD	0.0501863	FALSE	0
LRRD1	rhx1033	DD	NLRP1	rhx1139	PYD	-0.168732	FALSE	0
LRRD1	rhx1033	DD	CARD9	rhx1140	CARD	-0.202644	FALSE	0
LRRD1	rhx1033	DD	PIDD1	rhx1141	DD	-0.0194396	FALSE	0
LRRD1	rhx1033	DD	NLRC4	rhx1142	CARD	-0.15375	FALSE	0
LRRD1	rhx1033	DD	IRAK4	rhx1143	DD	0.485627	FALSE	0
ASC	rhx0989	CARD	CARD14	rhx1144	CARD	0.411092	FALSE	0
ASC	rhx0989	CARD	EDAR	rhx1145	DD	-0.0729053	FALSE	0
ASC	rhx0989	CARD	APAF1	rhx0644	CARD	-0.413177	FALSE	0
ASC	rhx0989	CARD	CARD8	rhx1146	CARD	1.87916	FALSE	0
ASC	rhx0989	CARD	BCL10	rhx2409	CARD	-0.34814	FALSE	0
ASC	rhx0989	CARD	NLRC5	rhx1174	CARD	-0.404447	FALSE	0
ASC	rhx0989	CARD	NLRC3	rhx1176	CARD	-0.716929	FALSE	0
ASC	rhx0989	CARD	FAS	rhx0653	DD	-0.282317	FALSE	0
ASC	rhx0989	CARD	none	rhx0935	NA	-0.150603	FALSE	0
LRRD1	rhx1033	DD	CARD14	rhx1144	CARD	1.444	FALSE	0
LRRD1	rhx1033	DD	EDAR	rhx1145	DD	1.2109	FALSE	0
LRRD1	rhx1033	DD	APAF1	rhx0644	CARD	1.17708	FALSE	0
LRRD1	rhx1033	DD	CARD8	rhx1146	CARD	0.639824	FALSE	0
LRRD1	rhx1033	DD	BCL10	rhx2409	CARD	0.664896	FALSE	0
LRRD1	rhx1033	DD	NLRC5	rhx1174	CARD	0.173568	FALSE	0
LRRD1	rhx1033	DD	NLRC3	rhx1176	CARD	0.176553	FALSE	0
LRRD1	rhx1033	DD	FAS	rhx0653	DD	-0.0624426	FALSE	0
LRRD1	rhx1033	DD	none	rhx0935	NA	1.2879	FALSE	0
ANKDD1B	rhx2932	DD	ASC	rhx0927	PYD, CARD	-0.267674	FALSE	0
ANKDD1B	rhx2932	DD	NLRP3	rhx0928	PYD	-0.450017	FALSE	0
ANKDD1B	rhx2932	DD	DR6	rhx1220	CARD	-1.12921	FALSE	0
ANKDD1B	rhx2932	DD	ASC	rhx0988	PYD	-1.12336	FALSE	0
ANKDD1B	rhx2932	DD	ASC	rhx0989	CARD	-0.168366	FALSE	0
ANKDD1B	rhx2932	DD	LRRD1	rhx1033	DD	-0.400077	FALSE	0
ANKDD1B	rhx2932	DD	CRADD	rhx1223	CARD	-0.181199	FALSE	0
ANKDD1B	rhx2932	DD	CRADD	rhx1224	DD	-0.273016	FALSE	0
ANKDD1B	rhx2932	DD	TRAIL-R2	rhx1051	DD	-0.605972	FALSE	0
ANKDD1B	rhx2932	DD	AIM2	rhx1052	PYD	-0.790678	FALSE	0
ANKDD1B	rhx2932	DD	CFLAR	rhx1053	2DED	-0.732091	FALSE	0
ANKDD1B	rhx2932	DD	QRICH1	rhx1229	CARD	-0.916492	FALSE	0
ANKDD1B	rhx2932	DD	Pyrin	rhx1054	PYD	-0.617456	FALSE	0
ANKDD1B	rhx2932	DD	IRAK2	rhx1055	DD	0.099507	FALSE	0
ANKDD1B	rhx2932	DD	NOL3	rhx1056	CARD	-0.281012	FALSE	0
ANKDD1B	rhx2932	DD	UNC5C	rhx1060	DD	-0.855949	FALSE	0
ANKDD1B	rhx2932	DD	NGFR	rhx1062	DD	-0.110555	FALSE	0
ANKDD1B	rhx2932	DD	ANK1	rhx1063	DD	-0.25058	FALSE	0
ANKDD1B	rhx2932	DD	TNFR1	rhx1064	DD	-0.211743	FALSE	0
ANKDD1B	rhx2932	DD	CASP1	rhx1066	CARD	-0.70664	FALSE	0
ANKDD1B	rhx2932	DD	MYD88	rhx1311	DD, TIR	-0.624664	FALSE	0
ANKDD1B	rhx2932	DD	MNDA	rhx1067	PYD	0.2834	FALSE	0
ANKDD1B	rhx2932	DD	FADD	rhx1312	DED, DD	-0.330282	FALSE	0
ANKDD1B	rhx2932	DD	CASP2	rhx1068	CARD	-0.593059	FALSE	0
ANKDD1B	rhx2932	DD	CASP8	rhx1313	2DED	-0.775302	FALSE	0
ANKDD1B	rhx2932	DD	CASP4	rhx1069	CARD	-0.607805	FALSE	0
ANKDD1B	rhx2932	DD	IRAK1	rhx1070	DD	-0.608639	FALSE	0
ANKDD1B	rhx2932	DD	CASP5	rhx1071	CARD	-1.18893	FALSE	0
ANKDD1B	rhx2932	DD	DAPK1	rhx1072	DD	0.57315	FALSE	0
ANKDD1B	rhx2932	DD	ICEBERG	rhx1073b	CARD	-0.226569	FALSE	0
ANKDD1B	rhx2932	DD	NLRP6	rhx1074	PYD	-0.108255	FALSE	0
ANKDD1B	rhx2932	DD	NLRP12	rhx1076	PYD	-0.396892	FALSE	0
ANKDD1B	rhx2932	DD	NLRP5	rhx1077	PYD	-0.0590097	FALSE	0
ANKDD1B	rhx2932	DD	CRADD	rhx1078	CARD, DD	-0.00592477	FALSE	0
ANKDD1B	rhx2932	DD	NFKB2	rhx1097	DD	0.547696	FALSE	0
ANKDD1B	rhx2932	DD	POP3	rhx1368	PYD	-0.400031	FALSE	0
ANKDD1B	rhx2932	DD	ANK2	rhx1098	DD	0.195207	FALSE	0
ANKDD1B	rhx2932	DD	ANK3	rhx1099	DD	-0.200214	FALSE	0
ANKDD1B	rhx2932	DD	BIRC3	rhx1100	CARD	-0.797305	FALSE	0
ANKDD1B	rhx2932	DD	BIRC2	rhx1101	CARD	-0.784825	FALSE	0
ANKDD1B	rhx2932	DD	PEA15	rhx1102b	DED	-0.166839	FALSE	0
ANKDD1B	rhx2932	DD	IFI16	rhx1103	PYD	0.743124	FALSE	0
ANKDD1B	rhx2932	DD	ANKDD1A	rhx1105	DD	0.441061	FALSE	0
ANKDD1B	rhx2932	DD	POP2	rhx1106	PYD	0.444926	FALSE	0
ANKDD1B	rhx2932	DD	COP1	rhx1107	CARD	0.238743	FALSE	0
ANKDD1B	rhx2932	DD	CARD17	rhx1108	CARD	0.637084	FALSE	0
ANKDD1B	rhx2932	DD	MAVS	rhx1379	CARD	-0.14227	FALSE	0
ANKDD1B	rhx2932	DD	IFIX	rhx1109	PYD	0.346014	FALSE	0
ANKDD1B	rhx2932	DD	UNC5D	rhx1113	DD	0.327852	FALSE	0
ANKDD1B	rhx2932	DD	DTHD1	rhx1114	DD	-0.433789	FALSE	0
ANKDD1B	rhx2932	DD	UNC5A	rhx1115	DD	-0.189855	FALSE	0
ANKDD1B	rhx2932	DD	NLRP9	rhx1116	PYD	0.0975981	FALSE	0
ANKDD1B	rhx2932	DD	MAVS	rhx1117	CARD	0.792009	FALSE	0
ANKDD1B	rhx2932	DD	FADD	rhx1899	DED	0.769203	FALSE	0
ANKDD1B	rhx2932	DD	NLRP14	rhx1118	PYD	0.452141	FALSE	0
ANKDD1B	rhx2932	DD	NLRP13	rhx1119	PYD	0.623145	FALSE	0
ANKDD1B	rhx2932	DD	NLRP10	rhx1120	PYD	0.353467	FALSE	0
ANKDD1B	rhx2932	DD	UNC5CL	rhx1122	DD	0.836888	FALSE	0
ANKDD1B	rhx2932	DD	UNC5B	rhx1123	DD	0.726516	FALSE	0
ANKDD1B	rhx2932	DD	DLG5	rhx1124	CARD	0.188265	FALSE	0
ANKDD1B	rhx2932	DD	EDARADD	rhx1125	DD	-0.149216	FALSE	0
ANKDD1B	rhx2932	DD	NLRP7	rhx1126	PYD	0.0211373	FALSE	0
ANKDD1B	rhx2932	DD	POP1	rhx1127	PYD	-0.678851	FALSE	0
ANKDD1B	rhx2932	DD	MALT1	rhx2115	DD	-1.12712	FALSE	0
ANKDD1B	rhx2932	DD	DEDD2	rhx1128	DED	0.0354286	FALSE	0
ANKDD1B	rhx2932	DD	MADD	rhx2116	DD	-0.600682	FALSE	0
ANKDD1B	rhx2932	DD	CASP10	rhx1129	2DED	0.39195	FALSE	0
ANKDD1B	rhx2932	DD	CASP9	rhx2117	CARD	0.607433	FALSE	0
ANKDD1B	rhx2932	DD	DR3	rhx1130	DD	0.0686791	FALSE	0
ANKDD1B	rhx2932	DD	CARD9	rhx2137	CARD	0.30239	FALSE	0
ANKDD1B	rhx2932	DD	THOC1	rhx1131	DD	0.455826	FALSE	0
ANKDD1B	rhx2932	DD	BCL10	rhx2138	CARD	0.637544	FALSE	0
ANKDD1B	rhx2932	DD	CARD19	rhx1132	CARD	0.636796	FALSE	0
ANKDD1B	rhx2932	DD	CARD11	rhx2230	CARD	0.692656	FALSE	0
ANKDD1B	rhx2932	DD	NLRP4	rhx1133	PYD	0.503426	FALSE	0
ANKDD1B	rhx2932	DD	CARD11	rhx2232	CARD	0.139927	FALSE	0
ANKDD1B	rhx2932	DD	CARD10	rhx1134	CARD	0.368202	FALSE	0
ANKDD1B	rhx2932	DD	CARD6	rhx1135	CARD	0.335224	FALSE	0
ANKDD1B	rhx2932	DD	MDA5	rhx1137	2CARD	-0.325888	FALSE	0
ANKDD1B	rhx2932	DD	NLRP1	rhx1138	CARD	-0.437627	FALSE	0
ANKDD1B	rhx2932	DD	NLRP1	rhx1139	PYD	-0.520721	FALSE	0
ANKDD1B	rhx2932	DD	CARD9	rhx1140	CARD	-1.00586	FALSE	0
ANKDD1B	rhx2932	DD	PIDD1	rhx1141	DD	0.610664	FALSE	0
ANKDD1B	rhx2932	DD	NLRC4	rhx1142	CARD	-0.47687	FALSE	0
ANKDD1B	rhx2932	DD	IRAK4	rhx1143	DD	-0.317071	FALSE	0
ANKDD1B	rhx2932	DD	CARD14	rhx1144	CARD	1.10015	FALSE	0
ANKDD1B	rhx2932	DD	EDAR	rhx1145	DD	1.07197	FALSE	0
ANKDD1B	rhx2932	DD	APAF1	rhx0644	CARD	1.16589	FALSE	0
ANKDD1B	rhx2932	DD	CARD8	rhx1146	CARD	0.477659	FALSE	0
ANKDD1B	rhx2932	DD	BCL10	rhx2409	CARD	-0.0160672	FALSE	0
ANKDD1B	rhx2932	DD	NLRC5	rhx1174	CARD	-0.323439	FALSE	0
ANKDD1B	rhx2932	DD	NLRC3	rhx1176	CARD	0.282209	FALSE	0
ANKDD1B	rhx2932	DD	FAS	rhx0653	DD	0.557496	FALSE	0
ANKDD1B	rhx2932	DD	none	rhx0935	NA	1.28229	FALSE	0
NGFR	rhx1062	DD	ASC	rhx0927	PYD, CARD	-0.488853	FALSE	0
NGFR	rhx1062	DD	NLRP3	rhx0928	PYD	-0.136971	FALSE	0
NGFR	rhx1062	DD	DR6	rhx1220	CARD	-0.875553	FALSE	0
NGFR	rhx1062	DD	ASC	rhx0988	PYD	-0.701968	FALSE	0
NGFR	rhx1062	DD	ASC	rhx0989	CARD	-0.135167	FALSE	0
NGFR	rhx1062	DD	LRRD1	rhx1033	DD	-0.460838	FALSE	0
NGFR	rhx1062	DD	CRADD	rhx1223	CARD	-0.621531	FALSE	0
NGFR	rhx1062	DD	CRADD	rhx1224	DD	-0.0605872	FALSE	0
ANK1	rhx1063	DD	ASC	rhx0927	PYD, CARD	0.428639	FALSE	0
ANK1	rhx1063	DD	NLRP3	rhx0928	PYD	0.896842	FALSE	0
ANK1	rhx1063	DD	DR6	rhx1220	CARD	1.25317	FALSE	0
ANK1	rhx1063	DD	ASC	rhx0988	PYD	-0.267287	FALSE	0
ANK1	rhx1063	DD	ASC	rhx0989	CARD	-0.210832	FALSE	0
ANK1	rhx1063	DD	LRRD1	rhx1033	DD	0.866736	FALSE	0
ANK1	rhx1063	DD	CRADD	rhx1223	CARD	0.128553	FALSE	0
ANK1	rhx1063	DD	CRADD	rhx1224	DD	-0.0486871	FALSE	0
NGFR	rhx1062	DD	TRAIL-R2	rhx1051	DD	-0.326149	FALSE	0
NGFR	rhx1062	DD	AIM2	rhx1052	PYD	-0.58933	FALSE	0
NGFR	rhx1062	DD	CFLAR	rhx1053	2DED	0.340125	FALSE	0
NGFR	rhx1062	DD	QRICH1	rhx1229	CARD	-1.12078	FALSE	0
NGFR	rhx1062	DD	Pyrin	rhx1054	PYD	-0.312035	FALSE	0
NGFR	rhx1062	DD	IRAK2	rhx1055	DD	-0.197388	FALSE	0
NGFR	rhx1062	DD	NOL3	rhx1056	CARD	-0.467626	FALSE	0
NGFR	rhx1062	DD	UNC5C	rhx1060	DD	-0.193445	FALSE	0
NGFR	rhx1062	DD	NGFR	rhx1062	DD	0.697	FALSE	0
ANK1	rhx1063	DD	TRAIL-R2	rhx1051	DD	-0.718268	FALSE	0
ANK1	rhx1063	DD	AIM2	rhx1052	PYD	0.617276	FALSE	0
ANK1	rhx1063	DD	CFLAR	rhx1053	2DED	-0.577004	FALSE	0
ANK1	rhx1063	DD	QRICH1	rhx1229	CARD	-0.914555	FALSE	0
ANK1	rhx1063	DD	Pyrin	rhx1054	PYD	-0.888358	FALSE	0
ANK1	rhx1063	DD	IRAK2	rhx1055	DD	-0.763261	FALSE	0
ANK1	rhx1063	DD	NOL3	rhx1056	CARD	-0.745698	FALSE	0
ANK1	rhx1063	DD	UNC5C	rhx1060	DD	-0.803856	FALSE	0
ANK1	rhx1063	DD	NGFR	rhx1062	DD	-0.0730279	FALSE	0
NGFR	rhx1062	DD	ANK1	rhx1063	DD	-0.225581	FALSE	0
NGFR	rhx1062	DD	TNFR1	rhx1064	DD	0.0468129	FALSE	0
NGFR	rhx1062	DD	CASP1	rhx1066	CARD	0.633987	FALSE	0
NGFR	rhx1062	DD	MYD88	rhx1311	DD, TIR	-0.786009	FALSE	0
NGFR	rhx1062	DD	MNDA	rhx1067	PYD	-0.24645	FALSE	0
NGFR	rhx1062	DD	FADD	rhx1312	DED, DD	-0.903846	FALSE	0
NGFR	rhx1062	DD	CASP2	rhx1068	CARD	-0.421151	FALSE	0
NGFR	rhx1062	DD	CASP8	rhx1313	2DED	-1.07476	FALSE	0
NGFR	rhx1062	DD	CASP4	rhx1069	CARD	-0.661972	FALSE	0
NGFR	rhx1062	DD	IRAK1	rhx1070	DD	-0.410556	FALSE	0
NGFR	rhx1062	DD	CASP5	rhx1071	CARD	-0.788456	FALSE	0
NGFR	rhx1062	DD	DAPK1	rhx1072	DD	3.33842	FALSE	0
NGFR	rhx1062	DD	ICEBERG	rhx1073b	CARD	-0.934095	FALSE	0
NGFR	rhx1062	DD	NLRP6	rhx1074	PYD	0.182028	FALSE	0
ANK1	rhx1063	DD	ANK1	rhx1063	DD	0.0137737	FALSE	0
ANK1	rhx1063	DD	TNFR1	rhx1064	DD	-0.14089	FALSE	0
ANK1	rhx1063	DD	CASP1	rhx1066	CARD	0.161444	FALSE	0
ANK1	rhx1063	DD	MYD88	rhx1311	DD, TIR	0.107637	FALSE	0
ANK1	rhx1063	DD	MNDA	rhx1067	PYD	-0.296627	FALSE	0
ANK1	rhx1063	DD	FADD	rhx1312	DED, DD	-0.177477	FALSE	0
ANK1	rhx1063	DD	CASP2	rhx1068	CARD	-0.256087	FALSE	0
ANK1	rhx1063	DD	CASP8	rhx1313	2DED	-0.363417	FALSE	0
ANK1	rhx1063	DD	CASP4	rhx1069	CARD	-0.451992	FALSE	0
ANK1	rhx1063	DD	IRAK1	rhx1070	DD	-0.722566	FALSE	0
ANK1	rhx1063	DD	CASP5	rhx1071	CARD	-0.053033	FALSE	0
ANK1	rhx1063	DD	DAPK1	rhx1072	DD	1.00895	FALSE	0
ANK1	rhx1063	DD	ICEBERG	rhx1073b	CARD	-0.174972	FALSE	0
ANK1	rhx1063	DD	NLRP6	rhx1074	PYD	-0.111419	FALSE	0
NGFR	rhx1062	DD	NLRP12	rhx1076	PYD	-0.0584291	FALSE	0
NGFR	rhx1062	DD	NLRP5	rhx1077	PYD	0.125137	FALSE	0
NGFR	rhx1062	DD	CRADD	rhx1078	CARD, DD	-0.116694	FALSE	0
NGFR	rhx1062	DD	NFKB2	rhx1097	DD	0.773842	FALSE	0
NGFR	rhx1062	DD	POP3	rhx1368	PYD	-0.44066	FALSE	0
NGFR	rhx1062	DD	ANK2	rhx1098	DD	-0.181435	FALSE	0
NGFR	rhx1062	DD	ANK3	rhx1099	DD	-0.688565	FALSE	0
NGFR	rhx1062	DD	BIRC3	rhx1100	CARD	-0.443114	FALSE	0
NGFR	rhx1062	DD	BIRC2	rhx1101	CARD	-0.348862	FALSE	0
NGFR	rhx1062	DD	PEA15	rhx1102b	DED	0.376274	FALSE	0
NGFR	rhx1062	DD	IFI16	rhx1103	PYD	-0.204644	FALSE	0
NGFR	rhx1062	DD	ANKDD1A	rhx1105	DD	0.435145	FALSE	0
ANK1	rhx1063	DD	NLRP12	rhx1076	PYD	0.390669	FALSE	0
ANK1	rhx1063	DD	NLRP5	rhx1077	PYD	-0.0782561	FALSE	0
ANK1	rhx1063	DD	CRADD	rhx1078	CARD, DD	-0.125043	FALSE	0
ANK1	rhx1063	DD	NFKB2	rhx1097	DD	0.0898088	FALSE	0
ANK1	rhx1063	DD	POP3	rhx1368	PYD	-0.185247	FALSE	0
ANK1	rhx1063	DD	ANK2	rhx1098	DD	-0.107567	FALSE	0
ANK1	rhx1063	DD	ANK3	rhx1099	DD	-0.828471	FALSE	0
ANK1	rhx1063	DD	BIRC3	rhx1100	CARD	-0.582288	FALSE	0
ANK1	rhx1063	DD	BIRC2	rhx1101	CARD	-0.639113	FALSE	0
ANK1	rhx1063	DD	PEA15	rhx1102b	DED	-0.483176	FALSE	0
ANK1	rhx1063	DD	IFI16	rhx1103	PYD	-0.296421	FALSE	0
ANK1	rhx1063	DD	ANKDD1A	rhx1105	DD	0.85332	FALSE	0
NGFR	rhx1062	DD	POP2	rhx1106	PYD	0.0737213	FALSE	0
NGFR	rhx1062	DD	COP1	rhx1107	CARD	0.420001	FALSE	0
NGFR	rhx1062	DD	CARD17	rhx1108	CARD	0.424846	FALSE	0
NGFR	rhx1062	DD	MAVS	rhx1379	CARD	2.35966	FALSE	0
NGFR	rhx1062	DD	IFIX	rhx1109	PYD	0.318732	FALSE	0
NGFR	rhx1062	DD	UNC5D	rhx1113	DD	-0.523547	FALSE	0
NGFR	rhx1062	DD	DTHD1	rhx1114	DD	-0.359779	FALSE	0
NGFR	rhx1062	DD	UNC5A	rhx1115	DD	-0.231197	FALSE	0
NGFR	rhx1062	DD	NLRP9	rhx1116	PYD	0.0520905	FALSE	0
NGFR	rhx1062	DD	MAVS	rhx1117	CARD	-0.361067	FALSE	0
NGFR	rhx1062	DD	FADD	rhx1899	DED	-0.282433	FALSE	0
NGFR	rhx1062	DD	NLRP14	rhx1118	PYD	0.606719	FALSE	0
NGFR	rhx1062	DD	NLRP13	rhx1119	PYD	0.875384	FALSE	0
ANK1	rhx1063	DD	POP2	rhx1106	PYD	0.156567	FALSE	0
ANK1	rhx1063	DD	COP1	rhx1107	CARD	1.92413	FALSE	0
ANK1	rhx1063	DD	CARD17	rhx1108	CARD	0.147538	FALSE	0
ANK1	rhx1063	DD	MAVS	rhx1379	CARD	-0.210204	FALSE	0
ANK1	rhx1063	DD	IFIX	rhx1109	PYD	0.0431161	FALSE	0
ANK1	rhx1063	DD	UNC5D	rhx1113	DD	-0.00121579	FALSE	0
ANK1	rhx1063	DD	DTHD1	rhx1114	DD	-0.429702	FALSE	0
ANK1	rhx1063	DD	UNC5A	rhx1115	DD	-0.716774	FALSE	0
ANK1	rhx1063	DD	NLRP9	rhx1116	PYD	0.357548	FALSE	0
ANK1	rhx1063	DD	MAVS	rhx1117	CARD	-0.0646171	FALSE	0
ANK1	rhx1063	DD	FADD	rhx1899	DED	0.0752803	FALSE	0
ANK1	rhx1063	DD	NLRP14	rhx1118	PYD	0.178784	FALSE	0
ANK1	rhx1063	DD	NLRP13	rhx1119	PYD	0.781736	FALSE	0
NGFR	rhx1062	DD	NLRP10	rhx1120	PYD	0.628532	FALSE	0
NGFR	rhx1062	DD	UNC5CL	rhx1122	DD	0.523858	FALSE	0
NGFR	rhx1062	DD	UNC5B	rhx1123	DD	0.516748	FALSE	0
NGFR	rhx1062	DD	DLG5	rhx1124	CARD	-0.118708	FALSE	0
NGFR	rhx1062	DD	EDARADD	rhx1125	DD	0.0690884	FALSE	0
NGFR	rhx1062	DD	NLRP7	rhx1126	PYD	0.0515547	FALSE	0
NGFR	rhx1062	DD	POP1	rhx1127	PYD	-0.407329	FALSE	0
NGFR	rhx1062	DD	MALT1	rhx2115	DD	0.0163456	FALSE	0
NGFR	rhx1062	DD	DEDD2	rhx1128	DED	1.23804	FALSE	0
NGFR	rhx1062	DD	MADD	rhx2116	DD	0.793928	FALSE	0
NGFR	rhx1062	DD	CASP10	rhx1129	2DED	-0.0157054	FALSE	0
NGFR	rhx1062	DD	CASP9	rhx2117	CARD	-0.460067	FALSE	0
NGFR	rhx1062	DD	DR3	rhx1130	DD	1.25888	FALSE	0
NGFR	rhx1062	DD	CARD9	rhx2137	CARD	1.6116	FALSE	0
NGFR	rhx1062	DD	THOC1	rhx1131	DD	0.71804	FALSE	0
NGFR	rhx1062	DD	BCL10	rhx2138	CARD	4.6964	FALSE	0
ANK1	rhx1063	DD	NLRP10	rhx1120	PYD	0.830299	FALSE	0
ANK1	rhx1063	DD	UNC5CL	rhx1122	DD	0.670602	FALSE	0
ANK1	rhx1063	DD	UNC5B	rhx1123	DD	0.425591	FALSE	0
ANK1	rhx1063	DD	DLG5	rhx1124	CARD	0.144771	FALSE	0
ANK1	rhx1063	DD	EDARADD	rhx1125	DD	0.0984882	FALSE	0
ANK1	rhx1063	DD	NLRP7	rhx1126	PYD	-0.343839	FALSE	0
ANK1	rhx1063	DD	POP1	rhx1127	PYD	-0.415175	FALSE	0
ANK1	rhx1063	DD	MALT1	rhx2115	DD	-0.029873	FALSE	0
ANK1	rhx1063	DD	DEDD2	rhx1128	DED	1.73288	FALSE	0
ANK1	rhx1063	DD	MADD	rhx2116	DD	0.689602	FALSE	0
ANK1	rhx1063	DD	CASP10	rhx1129	2DED	0.102943	FALSE	0
ANK1	rhx1063	DD	CASP9	rhx2117	CARD	0.243402	FALSE	0
ANK1	rhx1063	DD	DR3	rhx1130	DD	0.487481	FALSE	0
ANK1	rhx1063	DD	CARD9	rhx2137	CARD	1.13561	FALSE	0
ANK1	rhx1063	DD	THOC1	rhx1131	DD	0.759551	FALSE	0
ANK1	rhx1063	DD	BCL10	rhx2138	CARD	1.77238	FALSE	0
NGFR	rhx1062	DD	CARD19	rhx1132	CARD	1.15315	FALSE	0
NGFR	rhx1062	DD	CARD11	rhx2230	CARD	0.46606	FALSE	0
NGFR	rhx1062	DD	NLRP4	rhx1133	PYD	0.810402	FALSE	0
NGFR	rhx1062	DD	CARD11	rhx2232	CARD	0.517676	FALSE	0
NGFR	rhx1062	DD	CARD10	rhx1134	CARD	1.35616	FALSE	0
NGFR	rhx1062	DD	CARD6	rhx1135	CARD	0.417241	FALSE	0
NGFR	rhx1062	DD	MDA5	rhx1137	2CARD	0.543288	FALSE	0
NGFR	rhx1062	DD	NLRP1	rhx1138	CARD	-0.465036	FALSE	0
NGFR	rhx1062	DD	NLRP1	rhx1139	PYD	-0.61196	FALSE	0
NGFR	rhx1062	DD	CARD9	rhx1140	CARD	1.40604	FALSE	0
NGFR	rhx1062	DD	PIDD1	rhx1141	DD	0.487586	FALSE	0
NGFR	rhx1062	DD	NLRC4	rhx1142	CARD	1.13421	FALSE	0
NGFR	rhx1062	DD	IRAK4	rhx1143	DD	1.65627	FALSE	0
ANK1	rhx1063	DD	CARD19	rhx1132	CARD	0.6005	FALSE	0
ANK1	rhx1063	DD	CARD11	rhx2230	CARD	0.476068	FALSE	0
ANK1	rhx1063	DD	NLRP4	rhx1133	PYD	0.551608	FALSE	0
ANK1	rhx1063	DD	CARD11	rhx2232	CARD	0.363852	FALSE	0
ANK1	rhx1063	DD	CARD10	rhx1134	CARD	0.0713495	FALSE	0
ANK1	rhx1063	DD	CARD6	rhx1135	CARD	0.194873	FALSE	0
ANK1	rhx1063	DD	MDA5	rhx1137	2CARD	0.0827189	FALSE	0
ANK1	rhx1063	DD	NLRP1	rhx1138	CARD	-0.145391	FALSE	0
ANK1	rhx1063	DD	NLRP1	rhx1139	PYD	0.488392	FALSE	0
ANK1	rhx1063	DD	CARD9	rhx1140	CARD	0.139873	FALSE	0
ANK1	rhx1063	DD	PIDD1	rhx1141	DD	0.0689425	FALSE	0
ANK1	rhx1063	DD	NLRC4	rhx1142	CARD	0.836328	FALSE	0
ANK1	rhx1063	DD	IRAK4	rhx1143	DD	0.749991	FALSE	0
NGFR	rhx1062	DD	CARD14	rhx1144	CARD	1.29067	FALSE	0
NGFR	rhx1062	DD	EDAR	rhx1145	DD	1.2863	FALSE	0
NGFR	rhx1062	DD	APAF1	rhx0644	CARD	0.7225	FALSE	0
NGFR	rhx1062	DD	CARD8	rhx1146	CARD	0.40417	FALSE	0
NGFR	rhx1062	DD	BCL10	rhx2409	CARD	0.324247	FALSE	0
NGFR	rhx1062	DD	NLRC5	rhx1174	CARD	0.669986	FALSE	0
NGFR	rhx1062	DD	NLRC3	rhx1176	CARD	0.0799264	FALSE	0
NGFR	rhx1062	DD	FAS	rhx0653	DD	0.40775	FALSE	0
NGFR	rhx1062	DD	none	rhx0935	NA	7.3296	TRUE	0
ANK1	rhx1063	DD	CARD14	rhx1144	CARD	1.17199	FALSE	0
ANK1	rhx1063	DD	EDAR	rhx1145	DD	1.57463	FALSE	0
ANK1	rhx1063	DD	APAF1	rhx0644	CARD	0.937071	FALSE	0
ANK1	rhx1063	DD	CARD8	rhx1146	CARD	0.819761	FALSE	0
ANK1	rhx1063	DD	BCL10	rhx2409	CARD	0.484141	FALSE	0
ANK1	rhx1063	DD	NLRC5	rhx1174	CARD	-0.00147571	FALSE	0
ANK1	rhx1063	DD	NLRC3	rhx1176	CARD	-0.0283415	FALSE	0
ANK1	rhx1063	DD	FAS	rhx0653	DD	1.35911	FALSE	0
ANK1	rhx1063	DD	none	rhx0935	NA	1.45915	FALSE	0
MNDA	rhx1067	PYD	ASC	rhx0927	PYD, CARD	-0.256977	FALSE	0
MNDA	rhx1067	PYD	NLRP3	rhx0928	PYD	0.0605047	FALSE	0
MNDA	rhx1067	PYD	DR6	rhx1220	CARD	0.29552	FALSE	0
MNDA	rhx1067	PYD	ASC	rhx0988	PYD	0.55595	FALSE	0
MNDA	rhx1067	PYD	ASC	rhx0989	CARD	-0.0871102	FALSE	0
MNDA	rhx1067	PYD	LRRD1	rhx1033	DD	1.25255	FALSE	0
MNDA	rhx1067	PYD	CRADD	rhx1223	CARD	1.36448	FALSE	0
MNDA	rhx1067	PYD	CRADD	rhx1224	DD	1.11482	FALSE	0
CASP2	rhx1068	CARD	ASC	rhx0927	PYD, CARD	0.0914615	FALSE	0
CASP2	rhx1068	CARD	NLRP3	rhx0928	PYD	-0.0379343	FALSE	0
CASP2	rhx1068	CARD	DR6	rhx1220	CARD	-0.0947315	FALSE	0
CASP2	rhx1068	CARD	ASC	rhx0988	PYD	-0.621951	FALSE	0
CASP2	rhx1068	CARD	ASC	rhx0989	CARD	-0.454231	FALSE	0
CASP2	rhx1068	CARD	LRRD1	rhx1033	DD	-0.625309	FALSE	0
CASP2	rhx1068	CARD	CRADD	rhx1223	CARD	6.65993	TRUE	0
CASP2	rhx1068	CARD	CRADD	rhx1224	DD	-0.33396	FALSE	0
MNDA	rhx1067	PYD	TRAIL-R2	rhx1051	DD	-0.231481	FALSE	0
MNDA	rhx1067	PYD	AIM2	rhx1052	PYD	0.417735	FALSE	0
MNDA	rhx1067	PYD	CFLAR	rhx1053	2DED	-0.657203	FALSE	0
MNDA	rhx1067	PYD	QRICH1	rhx1229	CARD	-0.338322	FALSE	0
MNDA	rhx1067	PYD	Pyrin	rhx1054	PYD	-0.46922	FALSE	0
MNDA	rhx1067	PYD	IRAK2	rhx1055	DD	-0.0121908	FALSE	0
MNDA	rhx1067	PYD	NOL3	rhx1056	CARD	-0.430328	FALSE	0
MNDA	rhx1067	PYD	UNC5C	rhx1060	DD	0.0526293	FALSE	0
MNDA	rhx1067	PYD	NGFR	rhx1062	DD	0.351697	FALSE	0
CASP2	rhx1068	CARD	TRAIL-R2	rhx1051	DD	-0.802802	FALSE	0
CASP2	rhx1068	CARD	AIM2	rhx1052	PYD	-0.844051	FALSE	0
CASP2	rhx1068	CARD	CFLAR	rhx1053	2DED	-0.117748	FALSE	0
CASP2	rhx1068	CARD	QRICH1	rhx1229	CARD	0.176505	FALSE	0
CASP2	rhx1068	CARD	Pyrin	rhx1054	PYD	-0.131005	FALSE	0
CASP2	rhx1068	CARD	IRAK2	rhx1055	DD	-0.604096	FALSE	0
CASP2	rhx1068	CARD	NOL3	rhx1056	CARD	-0.290483	FALSE	0
CASP2	rhx1068	CARD	UNC5C	rhx1060	DD	-0.382627	FALSE	0
CASP2	rhx1068	CARD	NGFR	rhx1062	DD	-0.763543	FALSE	0
MNDA	rhx1067	PYD	ANK1	rhx1063	DD	-0.589897	FALSE	0
MNDA	rhx1067	PYD	TNFR1	rhx1064	DD	-0.122218	FALSE	0
MNDA	rhx1067	PYD	CASP1	rhx1066	CARD	-0.522141	FALSE	0
MNDA	rhx1067	PYD	MYD88	rhx1311	DD, TIR	-0.460067	FALSE	0
MNDA	rhx1067	PYD	MNDA	rhx1067	PYD	0.144253	FALSE	0
MNDA	rhx1067	PYD	FADD	rhx1312	DED, DD	0.331026	FALSE	0
MNDA	rhx1067	PYD	CASP2	rhx1068	CARD	-0.531034	FALSE	0
MNDA	rhx1067	PYD	CASP8	rhx1313	2DED	-0.248266	FALSE	0
MNDA	rhx1067	PYD	CASP4	rhx1069	CARD	-0.261728	FALSE	0
MNDA	rhx1067	PYD	IRAK1	rhx1070	DD	-0.360276	FALSE	0
MNDA	rhx1067	PYD	CASP5	rhx1071	CARD	0.205422	FALSE	0
MNDA	rhx1067	PYD	DAPK1	rhx1072	DD	-0.302064	FALSE	0
MNDA	rhx1067	PYD	ICEBERG	rhx1073b	CARD	0.489135	FALSE	0
MNDA	rhx1067	PYD	NLRP6	rhx1074	PYD	0.792223	FALSE	0
CASP2	rhx1068	CARD	ANK1	rhx1063	DD	-0.75961	FALSE	0
CASP2	rhx1068	CARD	TNFR1	rhx1064	DD	0.35181	FALSE	0
CASP2	rhx1068	CARD	CASP1	rhx1066	CARD	-0.100944	FALSE	0
CASP2	rhx1068	CARD	MYD88	rhx1311	DD, TIR	0.952019	FALSE	0
CASP2	rhx1068	CARD	MNDA	rhx1067	PYD	0.605198	FALSE	0
CASP2	rhx1068	CARD	FADD	rhx1312	DED, DD	0.790547	FALSE	0
CASP2	rhx1068	CARD	CASP2	rhx1068	CARD	6.75618	TRUE	0
CASP2	rhx1068	CARD	CASP8	rhx1313	2DED	0.414852	FALSE	0
CASP2	rhx1068	CARD	CASP4	rhx1069	CARD	0.138934	FALSE	0
CASP2	rhx1068	CARD	IRAK1	rhx1070	DD	-0.142292	FALSE	0
CASP2	rhx1068	CARD	CASP5	rhx1071	CARD	-0.0547685	FALSE	0
CASP2	rhx1068	CARD	DAPK1	rhx1072	DD	0.893992	FALSE	0
CASP2	rhx1068	CARD	ICEBERG	rhx1073b	CARD	-0.464113	FALSE	0
CASP2	rhx1068	CARD	NLRP6	rhx1074	PYD	0.748203	FALSE	0
MNDA	rhx1067	PYD	NLRP12	rhx1076	PYD	-0.716921	FALSE	0
MNDA	rhx1067	PYD	NLRP5	rhx1077	PYD	0.266695	FALSE	0
MNDA	rhx1067	PYD	CRADD	rhx1078	CARD, DD	-0.798902	FALSE	0
MNDA	rhx1067	PYD	NFKB2	rhx1097	DD	-0.615087	FALSE	0
MNDA	rhx1067	PYD	POP3	rhx1368	PYD	-0.625654	FALSE	0
MNDA	rhx1067	PYD	ANK2	rhx1098	DD	-0.974347	FALSE	0
MNDA	rhx1067	PYD	ANK3	rhx1099	DD	-0.989341	FALSE	0
MNDA	rhx1067	PYD	BIRC3	rhx1100	CARD	-0.796484	FALSE	0
MNDA	rhx1067	PYD	BIRC2	rhx1101	CARD	-0.200491	FALSE	0
MNDA	rhx1067	PYD	PEA15	rhx1102b	DED	1.61669	FALSE	0
MNDA	rhx1067	PYD	IFI16	rhx1103	PYD	-0.783317	FALSE	0
MNDA	rhx1067	PYD	ANKDD1A	rhx1105	DD	-0.0304864	FALSE	0
CASP2	rhx1068	CARD	NLRP12	rhx1076	PYD	-0.66435	FALSE	0
CASP2	rhx1068	CARD	NLRP5	rhx1077	PYD	-0.293234	FALSE	0
CASP2	rhx1068	CARD	CRADD	rhx1078	CARD, DD	6.14981	TRUE	0
CASP2	rhx1068	CARD	NFKB2	rhx1097	DD	0.518615	FALSE	0
CASP2	rhx1068	CARD	POP3	rhx1368	PYD	0.630847	FALSE	0
CASP2	rhx1068	CARD	ANK2	rhx1098	DD	-0.0199234	FALSE	0
CASP2	rhx1068	CARD	ANK3	rhx1099	DD	-0.336887	FALSE	0
CASP2	rhx1068	CARD	BIRC3	rhx1100	CARD	-0.524367	FALSE	0
CASP2	rhx1068	CARD	BIRC2	rhx1101	CARD	-0.218077	FALSE	0
CASP2	rhx1068	CARD	PEA15	rhx1102b	DED	0.977409	FALSE	0
CASP2	rhx1068	CARD	IFI16	rhx1103	PYD	-0.95096	FALSE	0
CASP2	rhx1068	CARD	ANKDD1A	rhx1105	DD	0.607094	FALSE	0
MNDA	rhx1067	PYD	POP2	rhx1106	PYD	-0.461305	FALSE	0
MNDA	rhx1067	PYD	COP1	rhx1107	CARD	0.193934	FALSE	0
MNDA	rhx1067	PYD	CARD17	rhx1108	CARD	0.273981	FALSE	0
MNDA	rhx1067	PYD	MAVS	rhx1379	CARD	1.03867	FALSE	0
MNDA	rhx1067	PYD	IFIX	rhx1109	PYD	-0.445966	FALSE	0
MNDA	rhx1067	PYD	UNC5D	rhx1113	DD	-0.678071	FALSE	0
MNDA	rhx1067	PYD	DTHD1	rhx1114	DD	-0.645295	FALSE	0
MNDA	rhx1067	PYD	UNC5A	rhx1115	DD	-0.256667	FALSE	0
MNDA	rhx1067	PYD	NLRP9	rhx1116	PYD	1.99479	FALSE	0
MNDA	rhx1067	PYD	MAVS	rhx1117	CARD	0.317525	FALSE	0
MNDA	rhx1067	PYD	FADD	rhx1899	DED	-0.0562136	FALSE	0
MNDA	rhx1067	PYD	NLRP14	rhx1118	PYD	0.496745	FALSE	0
MNDA	rhx1067	PYD	NLRP13	rhx1119	PYD	1.31672	FALSE	0
CASP2	rhx1068	CARD	POP2	rhx1106	PYD	-1.14454	FALSE	0
CASP2	rhx1068	CARD	COP1	rhx1107	CARD	0.10112	FALSE	0
CASP2	rhx1068	CARD	CARD17	rhx1108	CARD	-0.533769	FALSE	0
CASP2	rhx1068	CARD	MAVS	rhx1379	CARD	-0.0594381	FALSE	0
CASP2	rhx1068	CARD	IFIX	rhx1109	PYD	-0.228839	FALSE	0
CASP2	rhx1068	CARD	UNC5D	rhx1113	DD	0.11626	FALSE	0
CASP2	rhx1068	CARD	DTHD1	rhx1114	DD	-0.228606	FALSE	0
CASP2	rhx1068	CARD	UNC5A	rhx1115	DD	-0.247678	FALSE	0
CASP2	rhx1068	CARD	NLRP9	rhx1116	PYD	0.487383	FALSE	0
CASP2	rhx1068	CARD	MAVS	rhx1117	CARD	0.277538	FALSE	0
CASP2	rhx1068	CARD	FADD	rhx1899	DED	0.187307	FALSE	0
CASP2	rhx1068	CARD	NLRP14	rhx1118	PYD	0.554401	FALSE	0
CASP2	rhx1068	CARD	NLRP13	rhx1119	PYD	0.337364	FALSE	0
MNDA	rhx1067	PYD	NLRP10	rhx1120	PYD	-0.387957	FALSE	0
MNDA	rhx1067	PYD	UNC5CL	rhx1122	DD	-0.442779	FALSE	0
MNDA	rhx1067	PYD	UNC5B	rhx1123	DD	-0.0459423	FALSE	0
MNDA	rhx1067	PYD	DLG5	rhx1124	CARD	-0.144739	FALSE	0
MNDA	rhx1067	PYD	EDARADD	rhx1125	DD	-0.0105438	FALSE	0
MNDA	rhx1067	PYD	NLRP7	rhx1126	PYD	-0.972604	FALSE	0
MNDA	rhx1067	PYD	POP1	rhx1127	PYD	0.0530693	FALSE	0
MNDA	rhx1067	PYD	MALT1	rhx2115	DD	0.171462	FALSE	0
MNDA	rhx1067	PYD	DEDD2	rhx1128	DED	0.859882	FALSE	0
MNDA	rhx1067	PYD	MADD	rhx2116	DD	0.0548797	FALSE	0
MNDA	rhx1067	PYD	CASP10	rhx1129	2DED	-0.0178514	FALSE	0
MNDA	rhx1067	PYD	CASP9	rhx2117	CARD	0.527024	FALSE	0
MNDA	rhx1067	PYD	DR3	rhx1130	DD	0.238738	FALSE	0
MNDA	rhx1067	PYD	CARD9	rhx2137	CARD	0.411994	FALSE	0
MNDA	rhx1067	PYD	THOC1	rhx1131	DD	0.527605	FALSE	0
MNDA	rhx1067	PYD	BCL10	rhx2138	CARD	0.502097	FALSE	0
CASP2	rhx1068	CARD	NLRP10	rhx1120	PYD	-0.935004	FALSE	0
CASP2	rhx1068	CARD	UNC5CL	rhx1122	DD	0.326354	FALSE	0
CASP2	rhx1068	CARD	UNC5B	rhx1123	DD	-0.174528	FALSE	0
CASP2	rhx1068	CARD	DLG5	rhx1124	CARD	0.199392	FALSE	0
CASP2	rhx1068	CARD	EDARADD	rhx1125	DD	-0.163696	FALSE	0
CASP2	rhx1068	CARD	NLRP7	rhx1126	PYD	-0.54112	FALSE	0
CASP2	rhx1068	CARD	POP1	rhx1127	PYD	0.260401	FALSE	0
CASP2	rhx1068	CARD	MALT1	rhx2115	DD	0.754841	FALSE	0
CASP2	rhx1068	CARD	DEDD2	rhx1128	DED	-0.77431	FALSE	0
CASP2	rhx1068	CARD	MADD	rhx2116	DD	0.00742117	FALSE	0
CASP2	rhx1068	CARD	CASP10	rhx1129	2DED	0.298682	FALSE	0
CASP2	rhx1068	CARD	CASP9	rhx2117	CARD	0.956512	FALSE	0
CASP2	rhx1068	CARD	DR3	rhx1130	DD	-0.0256736	FALSE	0
CASP2	rhx1068	CARD	CARD9	rhx2137	CARD	0.393899	FALSE	0
CASP2	rhx1068	CARD	THOC1	rhx1131	DD	-0.16002	FALSE	0
CASP2	rhx1068	CARD	BCL10	rhx2138	CARD	-1.33387	FALSE	0
MNDA	rhx1067	PYD	CARD19	rhx1132	CARD	-0.132082	FALSE	0
MNDA	rhx1067	PYD	CARD11	rhx2230	CARD	0.182884	FALSE	0
MNDA	rhx1067	PYD	NLRP4	rhx1133	PYD	-0.17588	FALSE	0
MNDA	rhx1067	PYD	CARD11	rhx2232	CARD	1.50429	FALSE	0
MNDA	rhx1067	PYD	CARD10	rhx1134	CARD	0.0870254	FALSE	0
MNDA	rhx1067	PYD	CARD6	rhx1135	CARD	0.270717	FALSE	0
MNDA	rhx1067	PYD	MDA5	rhx1137	2CARD	0.437892	FALSE	0
MNDA	rhx1067	PYD	NLRP1	rhx1138	CARD	-0.0409537	FALSE	0
MNDA	rhx1067	PYD	NLRP1	rhx1139	PYD	0.272256	FALSE	0
MNDA	rhx1067	PYD	CARD9	rhx1140	CARD	-0.41996	FALSE	0
MNDA	rhx1067	PYD	PIDD1	rhx1141	DD	0.481001	FALSE	0
MNDA	rhx1067	PYD	NLRC4	rhx1142	CARD	0.437822	FALSE	0
MNDA	rhx1067	PYD	IRAK4	rhx1143	DD	1.73447	FALSE	0
CASP2	rhx1068	CARD	CARD19	rhx1132	CARD	-2.22005	FALSE	0
CASP2	rhx1068	CARD	CARD11	rhx2230	CARD	0.8299	FALSE	0
CASP2	rhx1068	CARD	NLRP4	rhx1133	PYD	-0.651953	FALSE	0
CASP2	rhx1068	CARD	CARD11	rhx2232	CARD	-0.328608	FALSE	0
CASP2	rhx1068	CARD	CARD10	rhx1134	CARD	0.419691	FALSE	0
CASP2	rhx1068	CARD	CARD6	rhx1135	CARD	-0.307702	FALSE	0
CASP2	rhx1068	CARD	MDA5	rhx1137	2CARD	-1.12257	FALSE	0
CASP2	rhx1068	CARD	NLRP1	rhx1138	CARD	-0.343009	FALSE	0
CASP2	rhx1068	CARD	NLRP1	rhx1139	PYD	-0.102108	FALSE	0
CASP2	rhx1068	CARD	CARD9	rhx1140	CARD	0.0362512	FALSE	0
CASP2	rhx1068	CARD	PIDD1	rhx1141	DD	0.437461	FALSE	0
CASP2	rhx1068	CARD	NLRC4	rhx1142	CARD	0.72358	FALSE	0
CASP2	rhx1068	CARD	IRAK4	rhx1143	DD	0.590716	FALSE	0
MNDA	rhx1067	PYD	CARD14	rhx1144	CARD	1.6007	FALSE	0
MNDA	rhx1067	PYD	EDAR	rhx1145	DD	-0.339361	FALSE	0
MNDA	rhx1067	PYD	APAF1	rhx0644	CARD	0.177681	FALSE	0
MNDA	rhx1067	PYD	CARD8	rhx1146	CARD	-0.387124	FALSE	0
MNDA	rhx1067	PYD	BCL10	rhx2409	CARD	-0.0538666	FALSE	0
MNDA	rhx1067	PYD	NLRC5	rhx1174	CARD	0.965916	FALSE	0
MNDA	rhx1067	PYD	NLRC3	rhx1176	CARD	-0.478973	FALSE	0
MNDA	rhx1067	PYD	FAS	rhx0653	DD	1.03368	FALSE	0
MNDA	rhx1067	PYD	none	rhx0935	NA	0.781381	FALSE	0
CASP2	rhx1068	CARD	CARD14	rhx1144	CARD	0.0521512	FALSE	0
CASP2	rhx1068	CARD	EDAR	rhx1145	DD	0.80684	FALSE	0
CASP2	rhx1068	CARD	APAF1	rhx0644	CARD	0.165476	FALSE	0
CASP2	rhx1068	CARD	CARD8	rhx1146	CARD	0.488902	FALSE	0
CASP2	rhx1068	CARD	BCL10	rhx2409	CARD	0.625451	FALSE	0
CASP2	rhx1068	CARD	NLRC5	rhx1174	CARD	-0.928411	FALSE	0
CASP2	rhx1068	CARD	NLRC3	rhx1176	CARD	-0.272268	FALSE	0
CASP2	rhx1068	CARD	FAS	rhx0653	DD	0.193035	FALSE	0
CASP2	rhx1068	CARD	none	rhx0935	NA	-0.0564649	FALSE	0
CASP1	rhx1066	CARD	ASC	rhx0927	PYD, CARD	9.82164	TRUE	0
CASP1	rhx1066	CARD	NLRP3	rhx0928	PYD	-0.379998	FALSE	0
CASP1	rhx1066	CARD	DR6	rhx1220	CARD	0.845088	FALSE	0
CASP1	rhx1066	CARD	ASC	rhx0988	PYD	0.143882	FALSE	0
CASP1	rhx1066	CARD	ASC	rhx0989	CARD	9.20086	TRUE	0
CASP1	rhx1066	CARD	LRRD1	rhx1033	DD	0.0473457	FALSE	0
CASP1	rhx1066	CARD	CRADD	rhx1223	CARD	0.207996	FALSE	0
CASP1	rhx1066	CARD	CRADD	rhx1224	DD	0.299904	FALSE	0
CASP1	rhx1066	CARD	TRAIL-R2	rhx1051	DD	-0.417799	FALSE	0
CASP1	rhx1066	CARD	AIM2	rhx1052	PYD	0.0729044	FALSE	0
CASP1	rhx1066	CARD	CFLAR	rhx1053	2DED	0.0413418	FALSE	0
CASP1	rhx1066	CARD	QRICH1	rhx1229	CARD	0.653832	FALSE	0
CASP1	rhx1066	CARD	Pyrin	rhx1054	PYD	-0.318846	FALSE	0
CASP1	rhx1066	CARD	IRAK2	rhx1055	DD	-0.48579	FALSE	0
CASP1	rhx1066	CARD	NOL3	rhx1056	CARD	0.0189016	FALSE	0
CASP1	rhx1066	CARD	UNC5C	rhx1060	DD	-0.371747	FALSE	0
CASP1	rhx1066	CARD	NGFR	rhx1062	DD	-0.868115	FALSE	0
CASP1	rhx1066	CARD	ANK1	rhx1063	DD	-0.4082	FALSE	0
CASP1	rhx1066	CARD	TNFR1	rhx1064	DD	-0.410544	FALSE	0
CASP1	rhx1066	CARD	CASP1	rhx1066	CARD	9.43176	TRUE	0
CASP1	rhx1066	CARD	MYD88	rhx1311	DD, TIR	0.483927	FALSE	0
CASP1	rhx1066	CARD	MNDA	rhx1067	PYD	-0.122472	FALSE	0
CASP1	rhx1066	CARD	FADD	rhx1312	DED, DD	0.681573	FALSE	0
CASP1	rhx1066	CARD	CASP2	rhx1068	CARD	-0.558791	FALSE	0
CASP1	rhx1066	CARD	CASP8	rhx1313	2DED	0.0994539	FALSE	0
CASP1	rhx1066	CARD	CASP4	rhx1069	CARD	-0.0175691	FALSE	0
CASP1	rhx1066	CARD	IRAK1	rhx1070	DD	-0.379148	FALSE	0
CASP1	rhx1066	CARD	CASP5	rhx1071	CARD	0.0325668	FALSE	0
CASP1	rhx1066	CARD	DAPK1	rhx1072	DD	0.539898	FALSE	0
CASP1	rhx1066	CARD	ICEBERG	rhx1073b	CARD	2.05822	FALSE	0
CASP1	rhx1066	CARD	NLRP6	rhx1074	PYD	-0.650208	FALSE	0
CASP1	rhx1066	CARD	NLRP12	rhx1076	PYD	-0.675317	FALSE	0
CASP1	rhx1066	CARD	NLRP5	rhx1077	PYD	-0.448979	FALSE	0
CASP1	rhx1066	CARD	CRADD	rhx1078	CARD, DD	-0.264801	FALSE	0
CASP1	rhx1066	CARD	NFKB2	rhx1097	DD	-0.379962	FALSE	0
CASP1	rhx1066	CARD	POP3	rhx1368	PYD	0.328346	FALSE	0
CASP1	rhx1066	CARD	ANK2	rhx1098	DD	-0.230005	FALSE	0
CASP1	rhx1066	CARD	ANK3	rhx1099	DD	-0.432266	FALSE	0
CASP1	rhx1066	CARD	BIRC3	rhx1100	CARD	-0.321134	FALSE	0
CASP1	rhx1066	CARD	BIRC2	rhx1101	CARD	-0.166212	FALSE	0
CASP1	rhx1066	CARD	PEA15	rhx1102b	DED	-0.284414	FALSE	0
CASP1	rhx1066	CARD	IFI16	rhx1103	PYD	-0.217397	FALSE	0
CASP1	rhx1066	CARD	ANKDD1A	rhx1105	DD	0.382152	FALSE	0
CASP1	rhx1066	CARD	POP2	rhx1106	PYD	-0.280236	FALSE	0
CASP1	rhx1066	CARD	COP1	rhx1107	CARD	9.71349	TRUE	0
CASP1	rhx1066	CARD	CARD17	rhx1108	CARD	3.57648	FALSE	0
CASP1	rhx1066	CARD	MAVS	rhx1379	CARD	0.142758	FALSE	0
CASP1	rhx1066	CARD	IFIX	rhx1109	PYD	0.073389	FALSE	0
CASP1	rhx1066	CARD	UNC5D	rhx1113	DD	-0.230248	FALSE	0
CASP1	rhx1066	CARD	DTHD1	rhx1114	DD	-0.660714	FALSE	0
CASP1	rhx1066	CARD	UNC5A	rhx1115	DD	-0.170077	FALSE	0
CASP1	rhx1066	CARD	NLRP9	rhx1116	PYD	0.00740947	FALSE	0
CASP1	rhx1066	CARD	MAVS	rhx1117	CARD	-0.51944	FALSE	0
CASP1	rhx1066	CARD	FADD	rhx1899	DED	0.392874	FALSE	0
CASP1	rhx1066	CARD	NLRP14	rhx1118	PYD	-0.164072	FALSE	0
CASP1	rhx1066	CARD	NLRP13	rhx1119	PYD	-0.305644	FALSE	0
CASP1	rhx1066	CARD	NLRP10	rhx1120	PYD	-0.300231	FALSE	0
CASP1	rhx1066	CARD	UNC5CL	rhx1122	DD	0.0146963	FALSE	0
CASP1	rhx1066	CARD	UNC5B	rhx1123	DD	0.1357	FALSE	0
CASP1	rhx1066	CARD	DLG5	rhx1124	CARD	-0.261633	FALSE	0
CASP1	rhx1066	CARD	EDARADD	rhx1125	DD	0.0249664	FALSE	0
CASP1	rhx1066	CARD	NLRP7	rhx1126	PYD	-0.557705	FALSE	0
CASP1	rhx1066	CARD	POP1	rhx1127	PYD	-0.125336	FALSE	0
CASP1	rhx1066	CARD	MALT1	rhx2115	DD	0.110407	FALSE	0
CASP1	rhx1066	CARD	DEDD2	rhx1128	DED	0.14524	FALSE	0
CASP1	rhx1066	CARD	MADD	rhx2116	DD	0.197815	FALSE	0
CASP1	rhx1066	CARD	CASP10	rhx1129	2DED	-0.27213	FALSE	0
CASP1	rhx1066	CARD	CASP9	rhx2117	CARD	0.999984	FALSE	0
CASP1	rhx1066	CARD	DR3	rhx1130	DD	-0.203415	FALSE	0
CASP1	rhx1066	CARD	CARD9	rhx2137	CARD	0.721943	FALSE	0
CASP1	rhx1066	CARD	THOC1	rhx1131	DD	-0.255605	FALSE	0
CASP1	rhx1066	CARD	BCL10	rhx2138	CARD	0.768476	FALSE	0
CASP1	rhx1066	CARD	CARD19	rhx1132	CARD	0.118252	FALSE	0
CASP1	rhx1066	CARD	CARD11	rhx2230	CARD	0.246888	FALSE	0
CASP1	rhx1066	CARD	NLRP4	rhx1133	PYD	0.156391	FALSE	0
CASP1	rhx1066	CARD	CARD11	rhx2232	CARD	0.138378	FALSE	0
CASP1	rhx1066	CARD	CARD10	rhx1134	CARD	-0.128069	FALSE	0
CASP1	rhx1066	CARD	CARD6	rhx1135	CARD	0.39171	FALSE	0
CASP1	rhx1066	CARD	MDA5	rhx1137	2CARD	-0.0144704	FALSE	0
CASP1	rhx1066	CARD	NLRP1	rhx1138	CARD	1.62517	FALSE	0
CASP1	rhx1066	CARD	NLRP1	rhx1139	PYD	0.517923	FALSE	0
CASP1	rhx1066	CARD	CARD9	rhx1140	CARD	0.0365235	FALSE	0
CASP1	rhx1066	CARD	PIDD1	rhx1141	DD	-0.346204	FALSE	0
CASP1	rhx1066	CARD	NLRC4	rhx1142	CARD	10.1218	TRUE	0
CASP1	rhx1066	CARD	IRAK4	rhx1143	DD	0.359775	FALSE	0
CASP1	rhx1066	CARD	CARD14	rhx1144	CARD	0.00338772	FALSE	0
CASP1	rhx1066	CARD	EDAR	rhx1145	DD	-0.0121947	FALSE	0
CASP1	rhx1066	CARD	APAF1	rhx0644	CARD	0.668897	FALSE	0
CASP1	rhx1066	CARD	CARD8	rhx1146	CARD	8.62952	TRUE	0
CASP1	rhx1066	CARD	BCL10	rhx2409	CARD	0.890182	FALSE	0
CASP1	rhx1066	CARD	NLRC5	rhx1174	CARD	0.153359	FALSE	0
CASP1	rhx1066	CARD	NLRC3	rhx1176	CARD	-0.431505	FALSE	0
CASP1	rhx1066	CARD	FAS	rhx0653	DD	0.821411	FALSE	0
CASP1	rhx1066	CARD	none	rhx0935	NA	-0.0527748	FALSE	0
DEDD	rhx2935	DED	ASC	rhx0927	PYD, CARD	-0.131567	FALSE	0
DEDD	rhx2935	DED	NLRP3	rhx0928	PYD	0.331887	FALSE	0
DEDD	rhx2935	DED	DR6	rhx1220	CARD	-1.07316	FALSE	0
DEDD	rhx2935	DED	ASC	rhx0988	PYD	-0.468339	FALSE	0
DEDD	rhx2935	DED	ASC	rhx0989	CARD	-0.672281	FALSE	0
DEDD	rhx2935	DED	LRRD1	rhx1033	DD	0.542307	FALSE	0
DEDD	rhx2935	DED	CRADD	rhx1223	CARD	-0.217299	FALSE	0
DEDD	rhx2935	DED	CRADD	rhx1224	DD	-1.02537	FALSE	0
UNC5C	rhx1060	DD	ASC	rhx0927	PYD, CARD	-0.483894	FALSE	0
UNC5C	rhx1060	DD	NLRP3	rhx0928	PYD	-0.500963	FALSE	0
UNC5C	rhx1060	DD	DR6	rhx1220	CARD	0.459188	FALSE	0
UNC5C	rhx1060	DD	ASC	rhx0988	PYD	-0.00850631	FALSE	0
UNC5C	rhx1060	DD	ASC	rhx0989	CARD	-0.491715	FALSE	0
UNC5C	rhx1060	DD	LRRD1	rhx1033	DD	-1.07307	FALSE	0
UNC5C	rhx1060	DD	CRADD	rhx1223	CARD	-0.562048	FALSE	0
UNC5C	rhx1060	DD	CRADD	rhx1224	DD	0.344137	FALSE	0
DEDD	rhx2935	DED	TRAIL-R2	rhx1051	DD	-0.435308	FALSE	0
DEDD	rhx2935	DED	AIM2	rhx1052	PYD	-0.0113034	FALSE	0
DEDD	rhx2935	DED	CFLAR	rhx1053	2DED	0.450706	FALSE	0
DEDD	rhx2935	DED	QRICH1	rhx1229	CARD	-1.14203	FALSE	0
DEDD	rhx2935	DED	Pyrin	rhx1054	PYD	-0.0996719	FALSE	0
DEDD	rhx2935	DED	IRAK2	rhx1055	DD	-0.644965	FALSE	0
DEDD	rhx2935	DED	NOL3	rhx1056	CARD	0.282676	FALSE	0
DEDD	rhx2935	DED	UNC5C	rhx1060	DD	0.455533	FALSE	0
DEDD	rhx2935	DED	NGFR	rhx1062	DD	-0.748389	FALSE	0
UNC5C	rhx1060	DD	TRAIL-R2	rhx1051	DD	-0.492188	FALSE	0
UNC5C	rhx1060	DD	AIM2	rhx1052	PYD	-0.0854905	FALSE	0
UNC5C	rhx1060	DD	CFLAR	rhx1053	2DED	-0.693602	FALSE	0
UNC5C	rhx1060	DD	QRICH1	rhx1229	CARD	-0.531383	FALSE	0
UNC5C	rhx1060	DD	Pyrin	rhx1054	PYD	-0.295373	FALSE	0
UNC5C	rhx1060	DD	IRAK2	rhx1055	DD	-0.653165	FALSE	0
UNC5C	rhx1060	DD	NOL3	rhx1056	CARD	-0.801982	FALSE	0
UNC5C	rhx1060	DD	UNC5C	rhx1060	DD	-0.324508	FALSE	0
UNC5C	rhx1060	DD	NGFR	rhx1062	DD	0.0401329	FALSE	0
DEDD	rhx2935	DED	ANK1	rhx1063	DD	-0.384086	FALSE	0
DEDD	rhx2935	DED	TNFR1	rhx1064	DD	0.360559	FALSE	0
DEDD	rhx2935	DED	CASP1	rhx1066	CARD	0.774209	FALSE	0
DEDD	rhx2935	DED	MYD88	rhx1311	DD, TIR	-0.613192	FALSE	0
DEDD	rhx2935	DED	MNDA	rhx1067	PYD	0.573052	FALSE	0
DEDD	rhx2935	DED	FADD	rhx1312	DED, DD	0.320216	FALSE	0
DEDD	rhx2935	DED	CASP2	rhx1068	CARD	0.131399	FALSE	0
DEDD	rhx2935	DED	CASP8	rhx1313	2DED	-0.330964	FALSE	0
DEDD	rhx2935	DED	CASP4	rhx1069	CARD	0.324743	FALSE	0
DEDD	rhx2935	DED	IRAK1	rhx1070	DD	-0.515922	FALSE	0
DEDD	rhx2935	DED	CASP5	rhx1071	CARD	-0.103121	FALSE	0
DEDD	rhx2935	DED	DAPK1	rhx1072	DD	0.539727	FALSE	0
DEDD	rhx2935	DED	ICEBERG	rhx1073b	CARD	0.0840466	FALSE	0
DEDD	rhx2935	DED	NLRP6	rhx1074	PYD	0.870685	FALSE	0
UNC5C	rhx1060	DD	ANK1	rhx1063	DD	-0.161047	FALSE	0
UNC5C	rhx1060	DD	TNFR1	rhx1064	DD	-0.388778	FALSE	0
UNC5C	rhx1060	DD	CASP1	rhx1066	CARD	0.0567732	FALSE	0
UNC5C	rhx1060	DD	MYD88	rhx1311	DD, TIR	-0.294615	FALSE	0
UNC5C	rhx1060	DD	MNDA	rhx1067	PYD	-0.350303	FALSE	0
UNC5C	rhx1060	DD	FADD	rhx1312	DED, DD	0.0932507	FALSE	0
UNC5C	rhx1060	DD	CASP2	rhx1068	CARD	-0.547721	FALSE	0
UNC5C	rhx1060	DD	CASP8	rhx1313	2DED	-0.145436	FALSE	0
UNC5C	rhx1060	DD	CASP4	rhx1069	CARD	-0.470662	FALSE	0
UNC5C	rhx1060	DD	IRAK1	rhx1070	DD	-0.753506	FALSE	0
UNC5C	rhx1060	DD	CASP5	rhx1071	CARD	-0.137951	FALSE	0
UNC5C	rhx1060	DD	DAPK1	rhx1072	DD	0.220079	FALSE	0
UNC5C	rhx1060	DD	ICEBERG	rhx1073b	CARD	-0.310069	FALSE	0
UNC5C	rhx1060	DD	NLRP6	rhx1074	PYD	-0.442634	FALSE	0
DEDD	rhx2935	DED	NLRP12	rhx1076	PYD	0.126294	FALSE	0
DEDD	rhx2935	DED	NLRP5	rhx1077	PYD	-0.121977	FALSE	0
DEDD	rhx2935	DED	CRADD	rhx1078	CARD, DD	-0.685101	FALSE	0
DEDD	rhx2935	DED	NFKB2	rhx1097	DD	-0.0318221	FALSE	0
DEDD	rhx2935	DED	POP3	rhx1368	PYD	-0.624473	FALSE	0
DEDD	rhx2935	DED	ANK2	rhx1098	DD	-0.0618393	FALSE	0
DEDD	rhx2935	DED	ANK3	rhx1099	DD	-0.0557417	FALSE	0
DEDD	rhx2935	DED	BIRC3	rhx1100	CARD	0.000425209	FALSE	0
DEDD	rhx2935	DED	BIRC2	rhx1101	CARD	-0.489707	FALSE	0
DEDD	rhx2935	DED	PEA15	rhx1102b	DED	-0.0974299	FALSE	0
DEDD	rhx2935	DED	IFI16	rhx1103	PYD	0.654323	FALSE	0
DEDD	rhx2935	DED	ANKDD1A	rhx1105	DD	0.0439312	FALSE	0
UNC5C	rhx1060	DD	NLRP12	rhx1076	PYD	0.0290495	FALSE	0
UNC5C	rhx1060	DD	NLRP5	rhx1077	PYD	-0.138498	FALSE	0
UNC5C	rhx1060	DD	CRADD	rhx1078	CARD, DD	-0.17332	FALSE	0
UNC5C	rhx1060	DD	NFKB2	rhx1097	DD	-0.548439	FALSE	0
UNC5C	rhx1060	DD	POP3	rhx1368	PYD	-0.00355417	FALSE	0
UNC5C	rhx1060	DD	ANK2	rhx1098	DD	-0.0889108	FALSE	0
UNC5C	rhx1060	DD	ANK3	rhx1099	DD	-0.541115	FALSE	0
UNC5C	rhx1060	DD	BIRC3	rhx1100	CARD	-0.248338	FALSE	0
UNC5C	rhx1060	DD	BIRC2	rhx1101	CARD	-0.736233	FALSE	0
UNC5C	rhx1060	DD	PEA15	rhx1102b	DED	-0.746584	FALSE	0
UNC5C	rhx1060	DD	IFI16	rhx1103	PYD	-0.272379	FALSE	0
UNC5C	rhx1060	DD	ANKDD1A	rhx1105	DD	1.00978	FALSE	0
DEDD	rhx2935	DED	POP2	rhx1106	PYD	-0.526914	FALSE	0
DEDD	rhx2935	DED	COP1	rhx1107	CARD	-0.104114	FALSE	0
DEDD	rhx2935	DED	CARD17	rhx1108	CARD	-0.0802299	FALSE	0
DEDD	rhx2935	DED	MAVS	rhx1379	CARD	-0.422415	FALSE	0
DEDD	rhx2935	DED	IFIX	rhx1109	PYD	0.420724	FALSE	0
DEDD	rhx2935	DED	UNC5D	rhx1113	DD	0.162425	FALSE	0
DEDD	rhx2935	DED	DTHD1	rhx1114	DD	0.351503	FALSE	0
DEDD	rhx2935	DED	UNC5A	rhx1115	DD	0.0126749	FALSE	0
DEDD	rhx2935	DED	NLRP9	rhx1116	PYD	-0.312259	FALSE	0
DEDD	rhx2935	DED	MAVS	rhx1117	CARD	0.204459	FALSE	0
DEDD	rhx2935	DED	FADD	rhx1899	DED	0.12061	FALSE	0
DEDD	rhx2935	DED	NLRP14	rhx1118	PYD	-0.13613	FALSE	0
DEDD	rhx2935	DED	NLRP13	rhx1119	PYD	-0.25135	FALSE	0
UNC5C	rhx1060	DD	POP2	rhx1106	PYD	0.393752	FALSE	0
UNC5C	rhx1060	DD	COP1	rhx1107	CARD	0.112862	FALSE	0
UNC5C	rhx1060	DD	CARD17	rhx1108	CARD	-0.553399	FALSE	0
UNC5C	rhx1060	DD	MAVS	rhx1379	CARD	0.155335	FALSE	0
UNC5C	rhx1060	DD	IFIX	rhx1109	PYD	0.135141	FALSE	0
UNC5C	rhx1060	DD	UNC5D	rhx1113	DD	0.0389739	FALSE	0
UNC5C	rhx1060	DD	DTHD1	rhx1114	DD	-0.88731	FALSE	0
UNC5C	rhx1060	DD	UNC5A	rhx1115	DD	-0.145716	FALSE	0
UNC5C	rhx1060	DD	NLRP9	rhx1116	PYD	-0.293754	FALSE	0
UNC5C	rhx1060	DD	MAVS	rhx1117	CARD	-0.206596	FALSE	0
UNC5C	rhx1060	DD	FADD	rhx1899	DED	0.622328	FALSE	0
UNC5C	rhx1060	DD	NLRP14	rhx1118	PYD	0.104642	FALSE	0
UNC5C	rhx1060	DD	NLRP13	rhx1119	PYD	0.641729	FALSE	0
DEDD	rhx2935	DED	NLRP10	rhx1120	PYD	0.496178	FALSE	0
DEDD	rhx2935	DED	UNC5CL	rhx1122	DD	0.201583	FALSE	0
DEDD	rhx2935	DED	UNC5B	rhx1123	DD	0.233493	FALSE	0
DEDD	rhx2935	DED	DLG5	rhx1124	CARD	-0.02655	FALSE	0
DEDD	rhx2935	DED	EDARADD	rhx1125	DD	0.356335	FALSE	0
DEDD	rhx2935	DED	NLRP7	rhx1126	PYD	-0.15842	FALSE	0
DEDD	rhx2935	DED	POP1	rhx1127	PYD	0.515318	FALSE	0
DEDD	rhx2935	DED	MALT1	rhx2115	DD	-0.75767	FALSE	0
DEDD	rhx2935	DED	DEDD2	rhx1128	DED	0.192802	FALSE	0
DEDD	rhx2935	DED	MADD	rhx2116	DD	0.956794	FALSE	0
DEDD	rhx2935	DED	CASP10	rhx1129	2DED	0.589565	FALSE	0
DEDD	rhx2935	DED	CASP9	rhx2117	CARD	-0.154666	FALSE	0
DEDD	rhx2935	DED	DR3	rhx1130	DD	0.193486	FALSE	0
DEDD	rhx2935	DED	CARD9	rhx2137	CARD	-0.0611764	FALSE	0
DEDD	rhx2935	DED	THOC1	rhx1131	DD	0.892758	FALSE	0
DEDD	rhx2935	DED	BCL10	rhx2138	CARD	0.565154	FALSE	0
UNC5C	rhx1060	DD	NLRP10	rhx1120	PYD	1.04959	FALSE	0
UNC5C	rhx1060	DD	UNC5CL	rhx1122	DD	0.919107	FALSE	0
UNC5C	rhx1060	DD	UNC5B	rhx1123	DD	0.085292	FALSE	0
UNC5C	rhx1060	DD	DLG5	rhx1124	CARD	-0.253563	FALSE	0
UNC5C	rhx1060	DD	EDARADD	rhx1125	DD	0.242987	FALSE	0
UNC5C	rhx1060	DD	NLRP7	rhx1126	PYD	-0.102425	FALSE	0
UNC5C	rhx1060	DD	POP1	rhx1127	PYD	-0.388633	FALSE	0
UNC5C	rhx1060	DD	MALT1	rhx2115	DD	0.38789	FALSE	0
UNC5C	rhx1060	DD	DEDD2	rhx1128	DED	0.761793	FALSE	0
UNC5C	rhx1060	DD	MADD	rhx2116	DD	0.644854	FALSE	0
UNC5C	rhx1060	DD	CASP10	rhx1129	2DED	-0.0261528	FALSE	0
UNC5C	rhx1060	DD	CASP9	rhx2117	CARD	-0.076695	FALSE	0
UNC5C	rhx1060	DD	DR3	rhx1130	DD	0.803688	FALSE	0
UNC5C	rhx1060	DD	CARD9	rhx2137	CARD	0.866921	FALSE	0
UNC5C	rhx1060	DD	THOC1	rhx1131	DD	0.717218	FALSE	0
UNC5C	rhx1060	DD	BCL10	rhx2138	CARD	0.928566	FALSE	0
DEDD	rhx2935	DED	CARD19	rhx1132	CARD	0.733416	FALSE	0
DEDD	rhx2935	DED	CARD11	rhx2230	CARD	0.29416	FALSE	0
DEDD	rhx2935	DED	NLRP4	rhx1133	PYD	0.158239	FALSE	0
DEDD	rhx2935	DED	CARD11	rhx2232	CARD	-0.192993	FALSE	0
DEDD	rhx2935	DED	CARD10	rhx1134	CARD	0.42994	FALSE	0
DEDD	rhx2935	DED	CARD6	rhx1135	CARD	0.944728	FALSE	0
DEDD	rhx2935	DED	MDA5	rhx1137	2CARD	-0.254493	FALSE	0
DEDD	rhx2935	DED	NLRP1	rhx1138	CARD	-0.332353	FALSE	0
DEDD	rhx2935	DED	NLRP1	rhx1139	PYD	0.0563949	FALSE	0
DEDD	rhx2935	DED	CARD9	rhx1140	CARD	0.348957	FALSE	0
DEDD	rhx2935	DED	PIDD1	rhx1141	DD	-0.428409	FALSE	0
DEDD	rhx2935	DED	NLRC4	rhx1142	CARD	1.06535	FALSE	0
DEDD	rhx2935	DED	IRAK4	rhx1143	DD	0.621029	FALSE	0
UNC5C	rhx1060	DD	CARD19	rhx1132	CARD	1.02665	FALSE	0
UNC5C	rhx1060	DD	CARD11	rhx2230	CARD	1.77758	FALSE	0
UNC5C	rhx1060	DD	NLRP4	rhx1133	PYD	1.26212	FALSE	0
UNC5C	rhx1060	DD	CARD11	rhx2232	CARD	0.924731	FALSE	0
UNC5C	rhx1060	DD	CARD10	rhx1134	CARD	0.408042	FALSE	0
UNC5C	rhx1060	DD	CARD6	rhx1135	CARD	0.35409	FALSE	0
UNC5C	rhx1060	DD	MDA5	rhx1137	2CARD	0.173745	FALSE	0
UNC5C	rhx1060	DD	NLRP1	rhx1138	CARD	-0.144493	FALSE	0
UNC5C	rhx1060	DD	NLRP1	rhx1139	PYD	0.362956	FALSE	0
UNC5C	rhx1060	DD	CARD9	rhx1140	CARD	-0.0449555	FALSE	0
UNC5C	rhx1060	DD	PIDD1	rhx1141	DD	-0.0492374	FALSE	0
UNC5C	rhx1060	DD	NLRC4	rhx1142	CARD	0.681291	FALSE	0
UNC5C	rhx1060	DD	IRAK4	rhx1143	DD	0.935851	FALSE	0
DEDD	rhx2935	DED	CARD14	rhx1144	CARD	0.916153	FALSE	0
DEDD	rhx2935	DED	EDAR	rhx1145	DD	0.691874	FALSE	0
DEDD	rhx2935	DED	APAF1	rhx0644	CARD	0.344659	FALSE	0
DEDD	rhx2935	DED	CARD8	rhx1146	CARD	0.39033	FALSE	0
DEDD	rhx2935	DED	BCL10	rhx2409	CARD	0.917042	FALSE	0
DEDD	rhx2935	DED	NLRC5	rhx1174	CARD	0.0137343	FALSE	0
DEDD	rhx2935	DED	NLRC3	rhx1176	CARD	-0.0826078	FALSE	0
DEDD	rhx2935	DED	FAS	rhx0653	DD	1.34226	FALSE	0
DEDD	rhx2935	DED	none	rhx0935	NA	0.680637	FALSE	0
UNC5C	rhx1060	DD	CARD14	rhx1144	CARD	1.75436	FALSE	0
UNC5C	rhx1060	DD	EDAR	rhx1145	DD	1.14681	FALSE	0
UNC5C	rhx1060	DD	APAF1	rhx0644	CARD	1.34874	FALSE	0
UNC5C	rhx1060	DD	CARD8	rhx1146	CARD	0.438358	FALSE	0
UNC5C	rhx1060	DD	BCL10	rhx2409	CARD	1.07608	FALSE	0
UNC5C	rhx1060	DD	NLRC5	rhx1174	CARD	0.618443	FALSE	0
UNC5C	rhx1060	DD	NLRC3	rhx1176	CARD	0.49854	FALSE	0
UNC5C	rhx1060	DD	FAS	rhx0653	DD	1.43485	FALSE	0
UNC5C	rhx1060	DD	none	rhx0935	NA	1.4509	FALSE	0
DAPK1	rhx1072	DD	ASC	rhx0927	PYD, CARD	-5.05458	FALSE	0
CASP4	rhx1069	CARD	ASC	rhx0927	PYD, CARD	-1.41227	FALSE	0
IRAK1	rhx1070	DD	ASC	rhx0927	PYD, CARD	-4.18923	FALSE	0
ANK2	rhx1098	DD	ASC	rhx0927	PYD, CARD	-0.645081	FALSE	0
ANK2	rhx1098	DD	NLRP3	rhx0928	PYD	-0.503965	FALSE	0
ANK2	rhx1098	DD	DR6	rhx1220	CARD	-0.593816	FALSE	0
ANK2	rhx1098	DD	ASC	rhx0988	PYD	-1.14807	FALSE	0
ANK2	rhx1098	DD	ASC	rhx0989	CARD	-0.949355	FALSE	0
ANK2	rhx1098	DD	LRRD1	rhx1033	DD	-1.03128	FALSE	0
ANK2	rhx1098	DD	CRADD	rhx1223	CARD	0.153057	FALSE	0
ANK2	rhx1098	DD	CRADD	rhx1224	DD	-0.0222599	FALSE	0
ANK3	rhx1099	DD	ASC	rhx0927	PYD, CARD	-0.793404	FALSE	0
ANK3	rhx1099	DD	NLRP3	rhx0928	PYD	-1.02686	FALSE	0
ANK3	rhx1099	DD	DR6	rhx1220	CARD	0.0219744	FALSE	0
ANK3	rhx1099	DD	ASC	rhx0988	PYD	-0.354525	FALSE	0
ANK3	rhx1099	DD	ASC	rhx0989	CARD	-0.498922	FALSE	0
ANK3	rhx1099	DD	LRRD1	rhx1033	DD	-0.50745	FALSE	0
ANK3	rhx1099	DD	CRADD	rhx1223	CARD	-0.188618	FALSE	0
ANK3	rhx1099	DD	CRADD	rhx1224	DD	0.347435	FALSE	0
ANK2	rhx1098	DD	TRAIL-R2	rhx1051	DD	-0.337063	FALSE	0
ANK2	rhx1098	DD	AIM2	rhx1052	PYD	-0.643907	FALSE	0
ANK2	rhx1098	DD	CFLAR	rhx1053	2DED	-0.18463	FALSE	0
ANK2	rhx1098	DD	QRICH1	rhx1229	CARD	-0.379109	FALSE	0
ANK2	rhx1098	DD	Pyrin	rhx1054	PYD	0.378453	FALSE	0
ANK2	rhx1098	DD	IRAK2	rhx1055	DD	-0.686311	FALSE	0
ANK2	rhx1098	DD	NOL3	rhx1056	CARD	-0.706849	FALSE	0
ANK2	rhx1098	DD	UNC5C	rhx1060	DD	-0.625269	FALSE	0
ANK2	rhx1098	DD	NGFR	rhx1062	DD	-0.484282	FALSE	0
ANK3	rhx1099	DD	TRAIL-R2	rhx1051	DD	-0.336872	FALSE	0
ANK3	rhx1099	DD	AIM2	rhx1052	PYD	-0.557558	FALSE	0
ANK3	rhx1099	DD	CFLAR	rhx1053	2DED	0.0458789	FALSE	0
ANK3	rhx1099	DD	QRICH1	rhx1229	CARD	-0.0146913	FALSE	0
ANK3	rhx1099	DD	Pyrin	rhx1054	PYD	-0.415151	FALSE	0
ANK3	rhx1099	DD	IRAK2	rhx1055	DD	-0.573906	FALSE	0
ANK3	rhx1099	DD	NOL3	rhx1056	CARD	-0.909753	FALSE	0
ANK3	rhx1099	DD	UNC5C	rhx1060	DD	-0.299979	FALSE	0
ANK3	rhx1099	DD	NGFR	rhx1062	DD	-0.0378506	FALSE	0
ANK2	rhx1098	DD	ANK1	rhx1063	DD	0.171303	FALSE	0
ANK2	rhx1098	DD	TNFR1	rhx1064	DD	-0.183133	FALSE	0
ANK2	rhx1098	DD	CASP1	rhx1066	CARD	0.205577	FALSE	0
ANK2	rhx1098	DD	MYD88	rhx1311	DD, TIR	-0.315483	FALSE	0
ANK2	rhx1098	DD	MNDA	rhx1067	PYD	0.662117	FALSE	0
ANK2	rhx1098	DD	FADD	rhx1312	DED, DD	0.0123106	FALSE	0
ANK2	rhx1098	DD	CASP2	rhx1068	CARD	0.337467	FALSE	0
ANK2	rhx1098	DD	CASP8	rhx1313	2DED	-0.179874	FALSE	0
ANK2	rhx1098	DD	CASP4	rhx1069	CARD	-0.774866	FALSE	0
ANK2	rhx1098	DD	IRAK1	rhx1070	DD	-0.492403	FALSE	0
ANK2	rhx1098	DD	CASP5	rhx1071	CARD	-0.967567	FALSE	0
ANK2	rhx1098	DD	DAPK1	rhx1072	DD	-0.371443	FALSE	0
ANK2	rhx1098	DD	ICEBERG	rhx1073b	CARD	-0.322492	FALSE	0
ANK2	rhx1098	DD	NLRP6	rhx1074	PYD	-0.450786	FALSE	0
ANK3	rhx1099	DD	ANK1	rhx1063	DD	0.323132	FALSE	0
ANK3	rhx1099	DD	TNFR1	rhx1064	DD	0.476708	FALSE	0
ANK3	rhx1099	DD	CASP1	rhx1066	CARD	0.193	FALSE	0
ANK3	rhx1099	DD	MYD88	rhx1311	DD, TIR	0.617145	FALSE	0
ANK3	rhx1099	DD	MNDA	rhx1067	PYD	0.0423137	FALSE	0
ANK3	rhx1099	DD	FADD	rhx1312	DED, DD	0.286552	FALSE	0
ANK3	rhx1099	DD	CASP2	rhx1068	CARD	-0.145387	FALSE	0
ANK3	rhx1099	DD	CASP8	rhx1313	2DED	0.65828	FALSE	0
ANK3	rhx1099	DD	CASP4	rhx1069	CARD	-0.492772	FALSE	0
ANK3	rhx1099	DD	IRAK1	rhx1070	DD	-0.712093	FALSE	0
ANK3	rhx1099	DD	CASP5	rhx1071	CARD	-0.585743	FALSE	0
ANK3	rhx1099	DD	DAPK1	rhx1072	DD	-0.591284	FALSE	0
ANK3	rhx1099	DD	ICEBERG	rhx1073b	CARD	0.610099	FALSE	0
ANK3	rhx1099	DD	NLRP6	rhx1074	PYD	-0.25192	FALSE	0
ANK2	rhx1098	DD	NLRP12	rhx1076	PYD	1.20536	FALSE	0
ANK2	rhx1098	DD	NLRP5	rhx1077	PYD	0.60386	FALSE	0
ANK2	rhx1098	DD	CRADD	rhx1078	CARD, DD	-0.00875415	FALSE	0
ANK2	rhx1098	DD	NFKB2	rhx1097	DD	0.586481	FALSE	0
ANK2	rhx1098	DD	POP3	rhx1368	PYD	1.58587	FALSE	0
ANK2	rhx1098	DD	ANK2	rhx1098	DD	0.434148	FALSE	0
ANK2	rhx1098	DD	ANK3	rhx1099	DD	-0.50884	FALSE	0
ANK2	rhx1098	DD	BIRC3	rhx1100	CARD	-0.132783	FALSE	0
ANK2	rhx1098	DD	BIRC2	rhx1101	CARD	-0.370811	FALSE	0
ANK2	rhx1098	DD	PEA15	rhx1102b	DED	-0.384126	FALSE	0
ANK2	rhx1098	DD	IFI16	rhx1103	PYD	2.09321	FALSE	0
ANK2	rhx1098	DD	ANKDD1A	rhx1105	DD	-0.0672806	FALSE	0
ANK3	rhx1099	DD	NLRP12	rhx1076	PYD	0.837955	FALSE	0
ANK3	rhx1099	DD	NLRP5	rhx1077	PYD	0.209419	FALSE	0
ANK3	rhx1099	DD	CRADD	rhx1078	CARD, DD	0.105256	FALSE	0
ANK3	rhx1099	DD	NFKB2	rhx1097	DD	0.624475	FALSE	0
ANK3	rhx1099	DD	POP3	rhx1368	PYD	1.47946	FALSE	0
ANK3	rhx1099	DD	ANK2	rhx1098	DD	0.629815	FALSE	0
ANK3	rhx1099	DD	ANK3	rhx1099	DD	0.0430948	FALSE	0
ANK3	rhx1099	DD	BIRC3	rhx1100	CARD	-0.412851	FALSE	0
ANK3	rhx1099	DD	BIRC2	rhx1101	CARD	-0.688268	FALSE	0
ANK3	rhx1099	DD	PEA15	rhx1102b	DED	-0.758671	FALSE	0
ANK3	rhx1099	DD	IFI16	rhx1103	PYD	0.71873	FALSE	0
ANK3	rhx1099	DD	ANKDD1A	rhx1105	DD	-0.0775181	FALSE	0
ANK2	rhx1098	DD	POP2	rhx1106	PYD	1.11415	FALSE	0
ANK2	rhx1098	DD	COP1	rhx1107	CARD	0.190773	FALSE	0
ANK2	rhx1098	DD	CARD17	rhx1108	CARD	1.28083	FALSE	0
ANK2	rhx1098	DD	MAVS	rhx1379	CARD	0.415438	FALSE	0
ANK2	rhx1098	DD	IFIX	rhx1109	PYD	0.19958	FALSE	0
ANK2	rhx1098	DD	UNC5D	rhx1113	DD	-0.348114	FALSE	0
ANK2	rhx1098	DD	DTHD1	rhx1114	DD	-0.212503	FALSE	0
ANK2	rhx1098	DD	UNC5A	rhx1115	DD	-0.489714	FALSE	0
ANK2	rhx1098	DD	NLRP9	rhx1116	PYD	-0.85212	FALSE	0
ANK2	rhx1098	DD	MAVS	rhx1117	CARD	0.348654	FALSE	0
ANK2	rhx1098	DD	FADD	rhx1899	DED	0.692193	FALSE	0
ANK2	rhx1098	DD	NLRP14	rhx1118	PYD	0.205912	FALSE	0
ANK2	rhx1098	DD	NLRP13	rhx1119	PYD	-0.135829	FALSE	0
ANK3	rhx1099	DD	POP2	rhx1106	PYD	1.24565	FALSE	0
ANK3	rhx1099	DD	COP1	rhx1107	CARD	0.176445	FALSE	0
ANK3	rhx1099	DD	CARD17	rhx1108	CARD	0.680006	FALSE	0
ANK3	rhx1099	DD	MAVS	rhx1379	CARD	1.27323	FALSE	0
ANK3	rhx1099	DD	IFIX	rhx1109	PYD	0.266613	FALSE	0
ANK3	rhx1099	DD	UNC5D	rhx1113	DD	-0.639023	FALSE	0
ANK3	rhx1099	DD	DTHD1	rhx1114	DD	-0.204387	FALSE	0
ANK3	rhx1099	DD	UNC5A	rhx1115	DD	-0.364948	FALSE	0
ANK3	rhx1099	DD	NLRP9	rhx1116	PYD	-0.888701	FALSE	0
ANK3	rhx1099	DD	MAVS	rhx1117	CARD	0.219772	FALSE	0
ANK3	rhx1099	DD	FADD	rhx1899	DED	1.14112	FALSE	0
ANK3	rhx1099	DD	NLRP14	rhx1118	PYD	-0.132023	FALSE	0
ANK3	rhx1099	DD	NLRP13	rhx1119	PYD	0.0811697	FALSE	0
ANK2	rhx1098	DD	NLRP10	rhx1120	PYD	1.36852	FALSE	0
ANK2	rhx1098	DD	UNC5CL	rhx1122	DD	0.586513	FALSE	0
ANK2	rhx1098	DD	UNC5B	rhx1123	DD	0.554135	FALSE	0
ANK2	rhx1098	DD	DLG5	rhx1124	CARD	0.446336	FALSE	0
ANK2	rhx1098	DD	EDARADD	rhx1125	DD	0.13893	FALSE	0
ANK2	rhx1098	DD	NLRP7	rhx1126	PYD	0.111752	FALSE	0
ANK2	rhx1098	DD	POP1	rhx1127	PYD	0.499307	FALSE	0
ANK2	rhx1098	DD	MALT1	rhx2115	DD	0.285543	FALSE	0
ANK2	rhx1098	DD	DEDD2	rhx1128	DED	0.595219	FALSE	0
ANK2	rhx1098	DD	MADD	rhx2116	DD	-0.153547	FALSE	0
ANK2	rhx1098	DD	CASP10	rhx1129	2DED	1.26292	FALSE	0
ANK2	rhx1098	DD	CASP9	rhx2117	CARD	0.0505007	FALSE	0
ANK2	rhx1098	DD	DR3	rhx1130	DD	-0.0832507	FALSE	0
ANK2	rhx1098	DD	CARD9	rhx2137	CARD	0.260798	FALSE	0
ANK2	rhx1098	DD	THOC1	rhx1131	DD	0.118032	FALSE	0
ANK2	rhx1098	DD	BCL10	rhx2138	CARD	0.399413	FALSE	0
ANK3	rhx1099	DD	NLRP10	rhx1120	PYD	1.46209	FALSE	0
ANK3	rhx1099	DD	UNC5CL	rhx1122	DD	0.554419	FALSE	0
ANK3	rhx1099	DD	UNC5B	rhx1123	DD	0.392989	FALSE	0
ANK3	rhx1099	DD	DLG5	rhx1124	CARD	0.245632	FALSE	0
ANK3	rhx1099	DD	EDARADD	rhx1125	DD	0.300602	FALSE	0
ANK3	rhx1099	DD	NLRP7	rhx1126	PYD	0.145603	FALSE	0
ANK3	rhx1099	DD	POP1	rhx1127	PYD	-0.642367	FALSE	0
ANK3	rhx1099	DD	MALT1	rhx2115	DD	0.224348	FALSE	0
ANK3	rhx1099	DD	DEDD2	rhx1128	DED	-0.574359	FALSE	0
ANK3	rhx1099	DD	MADD	rhx2116	DD	-0.0748376	FALSE	0
ANK3	rhx1099	DD	CASP10	rhx1129	2DED	0.920814	FALSE	0
ANK3	rhx1099	DD	CASP9	rhx2117	CARD	0.610552	FALSE	0
ANK3	rhx1099	DD	DR3	rhx1130	DD	-0.385751	FALSE	0
ANK3	rhx1099	DD	CARD9	rhx2137	CARD	0.176533	FALSE	0
ANK3	rhx1099	DD	THOC1	rhx1131	DD	0.00971083	FALSE	0
ANK3	rhx1099	DD	BCL10	rhx2138	CARD	0.179783	FALSE	0
ANK2	rhx1098	DD	CARD19	rhx1132	CARD	1.10102	FALSE	0
ANK2	rhx1098	DD	CARD11	rhx2230	CARD	1.62087	FALSE	0
ANK2	rhx1098	DD	NLRP4	rhx1133	PYD	0.604041	FALSE	0
ANK2	rhx1098	DD	CARD11	rhx2232	CARD	1.07105	FALSE	0
ANK2	rhx1098	DD	CARD10	rhx1134	CARD	-0.0564377	FALSE	0
ANK2	rhx1098	DD	CARD6	rhx1135	CARD	0.572325	FALSE	0
ANK2	rhx1098	DD	MDA5	rhx1137	2CARD	0.204536	FALSE	0
ANK2	rhx1098	DD	NLRP1	rhx1138	CARD	-0.0652519	FALSE	0
ANK2	rhx1098	DD	NLRP1	rhx1139	PYD	-0.277308	FALSE	0
ANK2	rhx1098	DD	CARD9	rhx1140	CARD	-0.433295	FALSE	0
ANK2	rhx1098	DD	PIDD1	rhx1141	DD	0.54099	FALSE	0
ANK2	rhx1098	DD	NLRC4	rhx1142	CARD	0.411292	FALSE	0
ANK2	rhx1098	DD	IRAK4	rhx1143	DD	0.0730776	FALSE	0
ANK3	rhx1099	DD	CARD19	rhx1132	CARD	1.28072	FALSE	0
ANK3	rhx1099	DD	CARD11	rhx2230	CARD	1.9661	FALSE	0
ANK3	rhx1099	DD	NLRP4	rhx1133	PYD	0.827841	FALSE	0
ANK3	rhx1099	DD	CARD11	rhx2232	CARD	0.812134	FALSE	0
ANK3	rhx1099	DD	CARD10	rhx1134	CARD	0.729733	FALSE	0
ANK3	rhx1099	DD	CARD6	rhx1135	CARD	1.38474	FALSE	0
ANK3	rhx1099	DD	MDA5	rhx1137	2CARD	0.917351	FALSE	0
ANK3	rhx1099	DD	NLRP1	rhx1138	CARD	-0.409841	FALSE	0
ANK3	rhx1099	DD	NLRP1	rhx1139	PYD	-0.332166	FALSE	0
ANK3	rhx1099	DD	CARD9	rhx1140	CARD	-0.173226	FALSE	0
ANK3	rhx1099	DD	PIDD1	rhx1141	DD	-0.437149	FALSE	0
ANK3	rhx1099	DD	NLRC4	rhx1142	CARD	-0.158413	FALSE	0
ANK3	rhx1099	DD	IRAK4	rhx1143	DD	-0.466175	FALSE	0
ANK2	rhx1098	DD	CARD14	rhx1144	CARD	2.14292	FALSE	0
ANK2	rhx1098	DD	EDAR	rhx1145	DD	0.907216	FALSE	0
ANK2	rhx1098	DD	APAF1	rhx0644	CARD	0.365573	FALSE	0
ANK2	rhx1098	DD	CARD8	rhx1146	CARD	0.801508	FALSE	0
ANK2	rhx1098	DD	BCL10	rhx2409	CARD	0.592259	FALSE	0
ANK2	rhx1098	DD	NLRC5	rhx1174	CARD	0.211607	FALSE	0
ANK2	rhx1098	DD	NLRC3	rhx1176	CARD	0.931851	FALSE	0
ANK2	rhx1098	DD	FAS	rhx0653	DD	-0.153606	FALSE	0
ANK2	rhx1098	DD	none	rhx0935	NA	0.831827	FALSE	0
ANK3	rhx1099	DD	CARD14	rhx1144	CARD	2.0689	FALSE	0
ANK3	rhx1099	DD	EDAR	rhx1145	DD	0.915322	FALSE	0
ANK3	rhx1099	DD	APAF1	rhx0644	CARD	0.768038	FALSE	0
ANK3	rhx1099	DD	CARD8	rhx1146	CARD	1.46032	FALSE	0
ANK3	rhx1099	DD	BCL10	rhx2409	CARD	0.594145	FALSE	0
ANK3	rhx1099	DD	NLRC5	rhx1174	CARD	0.679498	FALSE	0
ANK3	rhx1099	DD	NLRC3	rhx1176	CARD	-0.116254	FALSE	0
ANK3	rhx1099	DD	FAS	rhx0653	DD	-0.0600011	FALSE	0
ANK3	rhx1099	DD	none	rhx0935	NA	0.705399	FALSE	0
BIRC3	rhx1100	CARD	ASC	rhx0927	PYD, CARD	-0.910134	FALSE	0
BIRC3	rhx1100	CARD	NLRP3	rhx0928	PYD	-0.34485	FALSE	0
BIRC3	rhx1100	CARD	DR6	rhx1220	CARD	-0.412631	FALSE	0
BIRC3	rhx1100	CARD	ASC	rhx0988	PYD	-0.857457	FALSE	0
BIRC3	rhx1100	CARD	ASC	rhx0989	CARD	-0.98153	FALSE	0
BIRC3	rhx1100	CARD	LRRD1	rhx1033	DD	-0.958172	FALSE	0
BIRC3	rhx1100	CARD	CRADD	rhx1223	CARD	-0.282461	FALSE	0
BIRC3	rhx1100	CARD	CRADD	rhx1224	DD	-0.13513	FALSE	0
BIRC2	rhx1101	CARD	ASC	rhx0927	PYD, CARD	-0.893928	FALSE	0
BIRC2	rhx1101	CARD	NLRP3	rhx0928	PYD	-0.804025	FALSE	0
BIRC2	rhx1101	CARD	DR6	rhx1220	CARD	0.0561334	FALSE	0
BIRC2	rhx1101	CARD	ASC	rhx0988	PYD	0.57776	FALSE	0
BIRC2	rhx1101	CARD	ASC	rhx0989	CARD	-0.700463	FALSE	0
BIRC2	rhx1101	CARD	LRRD1	rhx1033	DD	-0.439831	FALSE	0
BIRC2	rhx1101	CARD	CRADD	rhx1223	CARD	-0.434474	FALSE	0
BIRC2	rhx1101	CARD	CRADD	rhx1224	DD	-0.283084	FALSE	0
BIRC3	rhx1100	CARD	TRAIL-R2	rhx1051	DD	-0.556363	FALSE	0
BIRC3	rhx1100	CARD	AIM2	rhx1052	PYD	-0.294887	FALSE	0
BIRC3	rhx1100	CARD	CFLAR	rhx1053	2DED	-0.62373	FALSE	0
BIRC3	rhx1100	CARD	QRICH1	rhx1229	CARD	0.156262	FALSE	0
BIRC3	rhx1100	CARD	Pyrin	rhx1054	PYD	-0.173518	FALSE	0
BIRC3	rhx1100	CARD	IRAK2	rhx1055	DD	-0.661172	FALSE	0
BIRC3	rhx1100	CARD	NOL3	rhx1056	CARD	-0.753397	FALSE	0
BIRC3	rhx1100	CARD	UNC5C	rhx1060	DD	-0.486393	FALSE	0
BIRC3	rhx1100	CARD	NGFR	rhx1062	DD	-0.281801	FALSE	0
BIRC2	rhx1101	CARD	TRAIL-R2	rhx1051	DD	-0.523088	FALSE	0
BIRC2	rhx1101	CARD	AIM2	rhx1052	PYD	-0.435308	FALSE	0
BIRC2	rhx1101	CARD	CFLAR	rhx1053	2DED	0.0620832	FALSE	0
BIRC2	rhx1101	CARD	QRICH1	rhx1229	CARD	0.00183552	FALSE	0
BIRC2	rhx1101	CARD	Pyrin	rhx1054	PYD	-0.664575	FALSE	0
BIRC2	rhx1101	CARD	IRAK2	rhx1055	DD	-0.697189	FALSE	0
BIRC2	rhx1101	CARD	NOL3	rhx1056	CARD	-0.877143	FALSE	0
BIRC2	rhx1101	CARD	UNC5C	rhx1060	DD	-0.682739	FALSE	0
BIRC2	rhx1101	CARD	NGFR	rhx1062	DD	-0.354967	FALSE	0
BIRC3	rhx1100	CARD	ANK1	rhx1063	DD	0.532631	FALSE	0
BIRC3	rhx1100	CARD	TNFR1	rhx1064	DD	-0.0453605	FALSE	0
BIRC3	rhx1100	CARD	CASP1	rhx1066	CARD	0.0792558	FALSE	0
BIRC3	rhx1100	CARD	MYD88	rhx1311	DD, TIR	0.34558	FALSE	0
BIRC3	rhx1100	CARD	MNDA	rhx1067	PYD	0.383404	FALSE	0
BIRC3	rhx1100	CARD	FADD	rhx1312	DED, DD	-0.0581362	FALSE	0
BIRC3	rhx1100	CARD	CASP2	rhx1068	CARD	0.0672027	FALSE	0
BIRC3	rhx1100	CARD	CASP8	rhx1313	2DED	0.4086	FALSE	0
BIRC3	rhx1100	CARD	CASP4	rhx1069	CARD	-0.14821	FALSE	0
BIRC3	rhx1100	CARD	IRAK1	rhx1070	DD	-0.415387	FALSE	0
BIRC3	rhx1100	CARD	CASP5	rhx1071	CARD	-0.676127	FALSE	0
BIRC3	rhx1100	CARD	DAPK1	rhx1072	DD	-0.548273	FALSE	0
BIRC3	rhx1100	CARD	ICEBERG	rhx1073b	CARD	-0.205901	FALSE	0
BIRC3	rhx1100	CARD	NLRP6	rhx1074	PYD	-0.521632	FALSE	0
BIRC2	rhx1101	CARD	ANK1	rhx1063	DD	0.293477	FALSE	0
BIRC2	rhx1101	CARD	TNFR1	rhx1064	DD	-0.138064	FALSE	0
BIRC2	rhx1101	CARD	CASP1	rhx1066	CARD	-0.043989	FALSE	0
BIRC2	rhx1101	CARD	MYD88	rhx1311	DD, TIR	0.180357	FALSE	0
BIRC2	rhx1101	CARD	MNDA	rhx1067	PYD	-0.214397	FALSE	0
BIRC2	rhx1101	CARD	FADD	rhx1312	DED, DD	-0.423069	FALSE	0
BIRC2	rhx1101	CARD	CASP2	rhx1068	CARD	-0.177558	FALSE	0
BIRC2	rhx1101	CARD	CASP8	rhx1313	2DED	0.0936749	FALSE	0
BIRC2	rhx1101	CARD	CASP4	rhx1069	CARD	-0.306395	FALSE	0
BIRC2	rhx1101	CARD	IRAK1	rhx1070	DD	-0.41391	FALSE	0
BIRC2	rhx1101	CARD	CASP5	rhx1071	CARD	-0.284923	FALSE	0
BIRC2	rhx1101	CARD	DAPK1	rhx1072	DD	-0.103852	FALSE	0
BIRC2	rhx1101	CARD	ICEBERG	rhx1073b	CARD	1.72396	FALSE	0
BIRC2	rhx1101	CARD	NLRP6	rhx1074	PYD	-0.225188	FALSE	0
BIRC3	rhx1100	CARD	NLRP12	rhx1076	PYD	0.907446	FALSE	0
BIRC3	rhx1100	CARD	NLRP5	rhx1077	PYD	0.494321	FALSE	0
BIRC3	rhx1100	CARD	CRADD	rhx1078	CARD, DD	-0.242755	FALSE	0
BIRC3	rhx1100	CARD	NFKB2	rhx1097	DD	0.953775	FALSE	0
BIRC3	rhx1100	CARD	POP3	rhx1368	PYD	0.748569	FALSE	0
BIRC3	rhx1100	CARD	ANK2	rhx1098	DD	0.244265	FALSE	0
BIRC3	rhx1100	CARD	ANK3	rhx1099	DD	-0.518317	FALSE	0
BIRC3	rhx1100	CARD	BIRC3	rhx1100	CARD	-0.676723	FALSE	0
BIRC3	rhx1100	CARD	BIRC2	rhx1101	CARD	-0.53136	FALSE	0
BIRC3	rhx1100	CARD	PEA15	rhx1102b	DED	0.0574347	FALSE	0
BIRC3	rhx1100	CARD	IFI16	rhx1103	PYD	0.670817	FALSE	0
BIRC3	rhx1100	CARD	ANKDD1A	rhx1105	DD	0.403546	FALSE	0
BIRC2	rhx1101	CARD	NLRP12	rhx1076	PYD	0.404854	FALSE	0
BIRC2	rhx1101	CARD	NLRP5	rhx1077	PYD	-0.086935	FALSE	0
BIRC2	rhx1101	CARD	CRADD	rhx1078	CARD, DD	0.590002	FALSE	0
BIRC2	rhx1101	CARD	NFKB2	rhx1097	DD	0.140487	FALSE	0
BIRC2	rhx1101	CARD	POP3	rhx1368	PYD	0.38704	FALSE	0
BIRC2	rhx1101	CARD	ANK2	rhx1098	DD	0.208907	FALSE	0
BIRC2	rhx1101	CARD	ANK3	rhx1099	DD	-0.24346	FALSE	0
BIRC2	rhx1101	CARD	BIRC3	rhx1100	CARD	-0.276246	FALSE	0
BIRC2	rhx1101	CARD	BIRC2	rhx1101	CARD	-0.539442	FALSE	0
BIRC2	rhx1101	CARD	PEA15	rhx1102b	DED	-0.290423	FALSE	0
BIRC2	rhx1101	CARD	IFI16	rhx1103	PYD	0.552808	FALSE	0
BIRC2	rhx1101	CARD	ANKDD1A	rhx1105	DD	0.0115192	FALSE	0
BIRC3	rhx1100	CARD	POP2	rhx1106	PYD	1.11345	FALSE	0
BIRC3	rhx1100	CARD	COP1	rhx1107	CARD	0.424082	FALSE	0
BIRC3	rhx1100	CARD	CARD17	rhx1108	CARD	0.721423	FALSE	0
BIRC3	rhx1100	CARD	MAVS	rhx1379	CARD	0.940365	FALSE	0
BIRC3	rhx1100	CARD	IFIX	rhx1109	PYD	-0.269595	FALSE	0
BIRC3	rhx1100	CARD	UNC5D	rhx1113	DD	-0.597567	FALSE	0
BIRC3	rhx1100	CARD	DTHD1	rhx1114	DD	-0.501335	FALSE	0
BIRC3	rhx1100	CARD	UNC5A	rhx1115	DD	-0.25362	FALSE	0
BIRC3	rhx1100	CARD	NLRP9	rhx1116	PYD	-0.224641	FALSE	0
BIRC3	rhx1100	CARD	MAVS	rhx1117	CARD	0.268846	FALSE	0
BIRC3	rhx1100	CARD	FADD	rhx1899	DED	0.333492	FALSE	0
BIRC3	rhx1100	CARD	NLRP14	rhx1118	PYD	-0.241085	FALSE	0
BIRC3	rhx1100	CARD	NLRP13	rhx1119	PYD	0.0390575	FALSE	0
BIRC2	rhx1101	CARD	POP2	rhx1106	PYD	1.23783	FALSE	0
BIRC2	rhx1101	CARD	COP1	rhx1107	CARD	0.124781	FALSE	0
BIRC2	rhx1101	CARD	CARD17	rhx1108	CARD	0.294522	FALSE	0
BIRC2	rhx1101	CARD	MAVS	rhx1379	CARD	-0.217065	FALSE	0
BIRC2	rhx1101	CARD	IFIX	rhx1109	PYD	-0.13904	FALSE	0
BIRC2	rhx1101	CARD	UNC5D	rhx1113	DD	-0.539986	FALSE	0
BIRC2	rhx1101	CARD	DTHD1	rhx1114	DD	-0.141083	FALSE	0
BIRC2	rhx1101	CARD	UNC5A	rhx1115	DD	-0.580037	FALSE	0
BIRC2	rhx1101	CARD	NLRP9	rhx1116	PYD	-0.518252	FALSE	0
BIRC2	rhx1101	CARD	MAVS	rhx1117	CARD	0.197438	FALSE	0
BIRC2	rhx1101	CARD	FADD	rhx1899	DED	-0.0214405	FALSE	0
BIRC2	rhx1101	CARD	NLRP14	rhx1118	PYD	-0.206597	FALSE	0
BIRC2	rhx1101	CARD	NLRP13	rhx1119	PYD	-0.000456655	FALSE	0
BIRC3	rhx1100	CARD	NLRP10	rhx1120	PYD	0.946134	FALSE	0
BIRC3	rhx1100	CARD	UNC5CL	rhx1122	DD	0.620616	FALSE	0
BIRC3	rhx1100	CARD	UNC5B	rhx1123	DD	0.166726	FALSE	0
BIRC3	rhx1100	CARD	DLG5	rhx1124	CARD	-0.23684	FALSE	0
BIRC3	rhx1100	CARD	EDARADD	rhx1125	DD	0.171085	FALSE	0
BIRC3	rhx1100	CARD	NLRP7	rhx1126	PYD	0.0312682	FALSE	0
BIRC3	rhx1100	CARD	POP1	rhx1127	PYD	-0.460302	FALSE	0
BIRC3	rhx1100	CARD	MALT1	rhx2115	DD	-0.306055	FALSE	0
BIRC3	rhx1100	CARD	DEDD2	rhx1128	DED	-0.088958	FALSE	0
BIRC3	rhx1100	CARD	MADD	rhx2116	DD	-0.424995	FALSE	0
BIRC3	rhx1100	CARD	CASP10	rhx1129	2DED	0.370951	FALSE	0
BIRC3	rhx1100	CARD	CASP9	rhx2117	CARD	0.0933213	FALSE	0
BIRC3	rhx1100	CARD	DR3	rhx1130	DD	-0.42271	FALSE	0
BIRC3	rhx1100	CARD	CARD9	rhx2137	CARD	-0.420333	FALSE	0
BIRC3	rhx1100	CARD	THOC1	rhx1131	DD	-0.148788	FALSE	0
BIRC3	rhx1100	CARD	BCL10	rhx2138	CARD	0.258719	FALSE	0
BIRC2	rhx1101	CARD	NLRP10	rhx1120	PYD	0.757044	FALSE	0
BIRC2	rhx1101	CARD	UNC5CL	rhx1122	DD	0.0504916	FALSE	0
BIRC2	rhx1101	CARD	UNC5B	rhx1123	DD	0.207054	FALSE	0
BIRC2	rhx1101	CARD	DLG5	rhx1124	CARD	0.276638	FALSE	0
BIRC2	rhx1101	CARD	EDARADD	rhx1125	DD	-0.0881972	FALSE	0
BIRC2	rhx1101	CARD	NLRP7	rhx1126	PYD	0.16197	FALSE	0
BIRC2	rhx1101	CARD	POP1	rhx1127	PYD	-0.081557	FALSE	0
BIRC2	rhx1101	CARD	MALT1	rhx2115	DD	-0.718112	FALSE	0
BIRC2	rhx1101	CARD	DEDD2	rhx1128	DED	-0.212084	FALSE	0
BIRC2	rhx1101	CARD	MADD	rhx2116	DD	-0.420283	FALSE	0
BIRC2	rhx1101	CARD	CASP10	rhx1129	2DED	0.232626	FALSE	0
BIRC2	rhx1101	CARD	CASP9	rhx2117	CARD	-0.376487	FALSE	0
BIRC2	rhx1101	CARD	DR3	rhx1130	DD	-0.174805	FALSE	0
BIRC2	rhx1101	CARD	CARD9	rhx2137	CARD	-0.246782	FALSE	0
BIRC2	rhx1101	CARD	THOC1	rhx1131	DD	0.0608812	FALSE	0
BIRC2	rhx1101	CARD	BCL10	rhx2138	CARD	0.014653	FALSE	0
BIRC3	rhx1100	CARD	CARD19	rhx1132	CARD	1.43102	FALSE	0
BIRC3	rhx1100	CARD	CARD11	rhx2230	CARD	1.70556	FALSE	0
BIRC3	rhx1100	CARD	NLRP4	rhx1133	PYD	1.05501	FALSE	0
BIRC3	rhx1100	CARD	CARD11	rhx2232	CARD	0.881014	FALSE	0
BIRC3	rhx1100	CARD	CARD10	rhx1134	CARD	0.811918	FALSE	0
BIRC3	rhx1100	CARD	CARD6	rhx1135	CARD	0.685955	FALSE	0
BIRC3	rhx1100	CARD	MDA5	rhx1137	2CARD	0.294748	FALSE	0
BIRC3	rhx1100	CARD	NLRP1	rhx1138	CARD	0.00148837	FALSE	0
BIRC3	rhx1100	CARD	NLRP1	rhx1139	PYD	-0.391988	FALSE	0
BIRC3	rhx1100	CARD	CARD9	rhx1140	CARD	-0.533155	FALSE	0
BIRC3	rhx1100	CARD	PIDD1	rhx1141	DD	0.0328058	FALSE	0
BIRC3	rhx1100	CARD	NLRC4	rhx1142	CARD	0.341665	FALSE	0
BIRC3	rhx1100	CARD	IRAK4	rhx1143	DD	0.188365	FALSE	0
BIRC2	rhx1101	CARD	CARD19	rhx1132	CARD	0.851172	FALSE	0
BIRC2	rhx1101	CARD	CARD11	rhx2230	CARD	1.88968	FALSE	0
BIRC2	rhx1101	CARD	NLRP4	rhx1133	PYD	0.830177	FALSE	0
BIRC2	rhx1101	CARD	CARD11	rhx2232	CARD	1.33837	FALSE	0
BIRC2	rhx1101	CARD	CARD10	rhx1134	CARD	0.685905	FALSE	0
BIRC2	rhx1101	CARD	CARD6	rhx1135	CARD	1.18793	FALSE	0
BIRC2	rhx1101	CARD	MDA5	rhx1137	2CARD	0.510263	FALSE	0
BIRC2	rhx1101	CARD	NLRP1	rhx1138	CARD	0.554211	FALSE	0
BIRC2	rhx1101	CARD	NLRP1	rhx1139	PYD	0.0160885	FALSE	0
BIRC2	rhx1101	CARD	CARD9	rhx1140	CARD	0.495236	FALSE	0
BIRC2	rhx1101	CARD	PIDD1	rhx1141	DD	0.387618	FALSE	0
BIRC2	rhx1101	CARD	NLRC4	rhx1142	CARD	0.848024	FALSE	0
BIRC2	rhx1101	CARD	IRAK4	rhx1143	DD	0.34444	FALSE	0
BIRC3	rhx1100	CARD	CARD14	rhx1144	CARD	2.11089	FALSE	0
BIRC3	rhx1100	CARD	EDAR	rhx1145	DD	1.37737	FALSE	0
BIRC3	rhx1100	CARD	APAF1	rhx0644	CARD	1.13415	FALSE	0
BIRC3	rhx1100	CARD	CARD8	rhx1146	CARD	1.31073	FALSE	0
BIRC3	rhx1100	CARD	BCL10	rhx2409	CARD	1.24862	FALSE	0
BIRC3	rhx1100	CARD	NLRC5	rhx1174	CARD	1.17236	FALSE	0
BIRC3	rhx1100	CARD	NLRC3	rhx1176	CARD	0.284242	FALSE	0
BIRC3	rhx1100	CARD	FAS	rhx0653	DD	0.0158372	FALSE	0
BIRC3	rhx1100	CARD	none	rhx0935	NA	1.14742	FALSE	0
BIRC2	rhx1101	CARD	CARD14	rhx1144	CARD	3.13815	FALSE	0
BIRC2	rhx1101	CARD	EDAR	rhx1145	DD	2.38204	FALSE	0
BIRC2	rhx1101	CARD	APAF1	rhx0644	CARD	2.28015	FALSE	0
BIRC2	rhx1101	CARD	CARD8	rhx1146	CARD	1.90238	FALSE	0
BIRC2	rhx1101	CARD	BCL10	rhx2409	CARD	1.5662	FALSE	0
BIRC2	rhx1101	CARD	NLRC5	rhx1174	CARD	1.12242	FALSE	0
BIRC2	rhx1101	CARD	NLRC3	rhx1176	CARD	1.01375	FALSE	0
BIRC2	rhx1101	CARD	FAS	rhx0653	DD	2.04434	FALSE	0
BIRC2	rhx1101	CARD	none	rhx0935	NA	2.6903	FALSE	0
PEA15	rhx1102b	DED	ASC	rhx0927	PYD, CARD	-0.669333	FALSE	0
PEA15	rhx1102b	DED	NLRP3	rhx0928	PYD	-0.48013	FALSE	0
PEA15	rhx1102b	DED	DR6	rhx1220	CARD	-0.0954376	FALSE	0
PEA15	rhx1102b	DED	ASC	rhx0988	PYD	-0.571131	FALSE	0
PEA15	rhx1102b	DED	ASC	rhx0989	CARD	-0.224271	FALSE	0
PEA15	rhx1102b	DED	LRRD1	rhx1033	DD	-0.876584	FALSE	0
PEA15	rhx1102b	DED	CRADD	rhx1223	CARD	0.0957259	FALSE	0
PEA15	rhx1102b	DED	CRADD	rhx1224	DD	3.53379	FALSE	0
IFI16	rhx1103	PYD	ASC	rhx0927	PYD, CARD	-0.861631	FALSE	0
IFI16	rhx1103	PYD	NLRP3	rhx0928	PYD	-0.690714	FALSE	0
IFI16	rhx1103	PYD	DR6	rhx1220	CARD	0.301544	FALSE	0
IFI16	rhx1103	PYD	ASC	rhx0988	PYD	0.344497	FALSE	0
IFI16	rhx1103	PYD	ASC	rhx0989	CARD	-0.410021	FALSE	0
IFI16	rhx1103	PYD	LRRD1	rhx1033	DD	-0.37606	FALSE	0
IFI16	rhx1103	PYD	CRADD	rhx1223	CARD	-0.0596668	FALSE	0
IFI16	rhx1103	PYD	CRADD	rhx1224	DD	0.0537015	FALSE	0
PEA15	rhx1102b	DED	TRAIL-R2	rhx1051	DD	-1.11754	FALSE	0
PEA15	rhx1102b	DED	AIM2	rhx1052	PYD	-1.30034	FALSE	0
PEA15	rhx1102b	DED	CFLAR	rhx1053	2DED	-1.2542	FALSE	0
PEA15	rhx1102b	DED	QRICH1	rhx1229	CARD	0.57452	FALSE	0
PEA15	rhx1102b	DED	Pyrin	rhx1054	PYD	-0.103503	FALSE	0
PEA15	rhx1102b	DED	IRAK2	rhx1055	DD	-1.71415	FALSE	0
PEA15	rhx1102b	DED	NOL3	rhx1056	CARD	-1.50804	FALSE	0
PEA15	rhx1102b	DED	UNC5C	rhx1060	DD	-0.674165	FALSE	0
PEA15	rhx1102b	DED	NGFR	rhx1062	DD	-0.527217	FALSE	0
IFI16	rhx1103	PYD	TRAIL-R2	rhx1051	DD	-0.464168	FALSE	0
IFI16	rhx1103	PYD	AIM2	rhx1052	PYD	-0.460911	FALSE	0
IFI16	rhx1103	PYD	CFLAR	rhx1053	2DED	0.376677	FALSE	0
IFI16	rhx1103	PYD	QRICH1	rhx1229	CARD	-0.0037838	FALSE	0
IFI16	rhx1103	PYD	Pyrin	rhx1054	PYD	-0.78598	FALSE	0
IFI16	rhx1103	PYD	IRAK2	rhx1055	DD	-0.263766	FALSE	0
IFI16	rhx1103	PYD	NOL3	rhx1056	CARD	-0.337622	FALSE	0
IFI16	rhx1103	PYD	UNC5C	rhx1060	DD	-0.2998	FALSE	0
IFI16	rhx1103	PYD	NGFR	rhx1062	DD	0.215526	FALSE	0
PEA15	rhx1102b	DED	ANK1	rhx1063	DD	0.161763	FALSE	0
PEA15	rhx1102b	DED	TNFR1	rhx1064	DD	-0.44533	FALSE	0
PEA15	rhx1102b	DED	CASP1	rhx1066	CARD	-0.612804	FALSE	0
PEA15	rhx1102b	DED	MYD88	rhx1311	DD, TIR	0.412965	FALSE	0
PEA15	rhx1102b	DED	MNDA	rhx1067	PYD	-0.144242	FALSE	0
PEA15	rhx1102b	DED	FADD	rhx1312	DED, DD	-0.154627	FALSE	0
PEA15	rhx1102b	DED	CASP2	rhx1068	CARD	-0.753816	FALSE	0
PEA15	rhx1102b	DED	CASP8	rhx1313	2DED	-0.43094	FALSE	0
PEA15	rhx1102b	DED	CASP4	rhx1069	CARD	-1.54884	FALSE	0
PEA15	rhx1102b	DED	IRAK1	rhx1070	DD	-0.156979	FALSE	0
PEA15	rhx1102b	DED	CASP5	rhx1071	CARD	-0.384055	FALSE	0
PEA15	rhx1102b	DED	DAPK1	rhx1072	DD	-0.254975	FALSE	0
PEA15	rhx1102b	DED	ICEBERG	rhx1073b	CARD	0.507667	FALSE	0
PEA15	rhx1102b	DED	NLRP6	rhx1074	PYD	-0.267784	FALSE	0
IFI16	rhx1103	PYD	ANK1	rhx1063	DD	0.00247396	FALSE	0
IFI16	rhx1103	PYD	TNFR1	rhx1064	DD	-0.237419	FALSE	0
IFI16	rhx1103	PYD	CASP1	rhx1066	CARD	-0.454403	FALSE	0
IFI16	rhx1103	PYD	MYD88	rhx1311	DD, TIR	0.234056	FALSE	0
IFI16	rhx1103	PYD	MNDA	rhx1067	PYD	1.94118	FALSE	0
IFI16	rhx1103	PYD	FADD	rhx1312	DED, DD	0.0113459	FALSE	0
IFI16	rhx1103	PYD	CASP2	rhx1068	CARD	-0.231981	FALSE	0
IFI16	rhx1103	PYD	CASP8	rhx1313	2DED	-0.628251	FALSE	0
IFI16	rhx1103	PYD	CASP4	rhx1069	CARD	-0.0166122	FALSE	0
IFI16	rhx1103	PYD	IRAK1	rhx1070	DD	-0.212202	FALSE	0
IFI16	rhx1103	PYD	CASP5	rhx1071	CARD	0.294562	FALSE	0
IFI16	rhx1103	PYD	DAPK1	rhx1072	DD	0.265447	FALSE	0
IFI16	rhx1103	PYD	ICEBERG	rhx1073b	CARD	1.44839	FALSE	0
IFI16	rhx1103	PYD	NLRP6	rhx1074	PYD	0.362374	FALSE	0
PEA15	rhx1102b	DED	NLRP12	rhx1076	PYD	0.272631	FALSE	0
PEA15	rhx1102b	DED	NLRP5	rhx1077	PYD	0.0473854	FALSE	0
PEA15	rhx1102b	DED	CRADD	rhx1078	CARD, DD	-0.220953	FALSE	0
PEA15	rhx1102b	DED	NFKB2	rhx1097	DD	0.0266894	FALSE	0
PEA15	rhx1102b	DED	POP3	rhx1368	PYD	0.735487	FALSE	0
PEA15	rhx1102b	DED	ANK2	rhx1098	DD	-0.242476	FALSE	0
PEA15	rhx1102b	DED	ANK3	rhx1099	DD	-0.125208	FALSE	0
PEA15	rhx1102b	DED	BIRC3	rhx1100	CARD	-0.700758	FALSE	0
PEA15	rhx1102b	DED	BIRC2	rhx1101	CARD	-0.239788	FALSE	0
PEA15	rhx1102b	DED	PEA15	rhx1102b	DED	0.013035	FALSE	0
PEA15	rhx1102b	DED	IFI16	rhx1103	PYD	2.40438	FALSE	0
PEA15	rhx1102b	DED	ANKDD1A	rhx1105	DD	0.2045	FALSE	0
IFI16	rhx1103	PYD	NLRP12	rhx1076	PYD	-0.100642	FALSE	0
IFI16	rhx1103	PYD	NLRP5	rhx1077	PYD	-0.293717	FALSE	0
IFI16	rhx1103	PYD	CRADD	rhx1078	CARD, DD	-0.0638757	FALSE	0
IFI16	rhx1103	PYD	NFKB2	rhx1097	DD	-0.238297	FALSE	0
IFI16	rhx1103	PYD	POP3	rhx1368	PYD	-0.0710321	FALSE	0
IFI16	rhx1103	PYD	ANK2	rhx1098	DD	0.043763	FALSE	0
IFI16	rhx1103	PYD	ANK3	rhx1099	DD	-0.410299	FALSE	0
IFI16	rhx1103	PYD	BIRC3	rhx1100	CARD	-0.184456	FALSE	0
IFI16	rhx1103	PYD	BIRC2	rhx1101	CARD	0.170212	FALSE	0
IFI16	rhx1103	PYD	PEA15	rhx1102b	DED	0.202752	FALSE	0
IFI16	rhx1103	PYD	IFI16	rhx1103	PYD	3.39642	FALSE	0
IFI16	rhx1103	PYD	ANKDD1A	rhx1105	DD	0.471228	FALSE	0
PEA15	rhx1102b	DED	POP2	rhx1106	PYD	0.785133	FALSE	0
PEA15	rhx1102b	DED	COP1	rhx1107	CARD	0.318642	FALSE	0
PEA15	rhx1102b	DED	CARD17	rhx1108	CARD	0.792008	FALSE	0
PEA15	rhx1102b	DED	MAVS	rhx1379	CARD	0.219848	FALSE	0
PEA15	rhx1102b	DED	IFIX	rhx1109	PYD	0.462082	FALSE	0
PEA15	rhx1102b	DED	UNC5D	rhx1113	DD	-0.164434	FALSE	0
PEA15	rhx1102b	DED	DTHD1	rhx1114	DD	-0.351624	FALSE	0
PEA15	rhx1102b	DED	UNC5A	rhx1115	DD	0.00503737	FALSE	0
PEA15	rhx1102b	DED	NLRP9	rhx1116	PYD	-0.491861	FALSE	0
PEA15	rhx1102b	DED	MAVS	rhx1117	CARD	1.33226	FALSE	0
PEA15	rhx1102b	DED	FADD	rhx1899	DED	1.65102	FALSE	0
PEA15	rhx1102b	DED	NLRP14	rhx1118	PYD	-0.100068	FALSE	0
PEA15	rhx1102b	DED	NLRP13	rhx1119	PYD	0.0522939	FALSE	0
IFI16	rhx1103	PYD	POP2	rhx1106	PYD	-0.151044	FALSE	0
IFI16	rhx1103	PYD	COP1	rhx1107	CARD	-0.315825	FALSE	0
IFI16	rhx1103	PYD	CARD17	rhx1108	CARD	0.247748	FALSE	0
IFI16	rhx1103	PYD	MAVS	rhx1379	CARD	-0.293909	FALSE	0
IFI16	rhx1103	PYD	IFIX	rhx1109	PYD	2.83566	FALSE	0
IFI16	rhx1103	PYD	UNC5D	rhx1113	DD	-0.202488	FALSE	0
IFI16	rhx1103	PYD	DTHD1	rhx1114	DD	0.0225078	FALSE	0
IFI16	rhx1103	PYD	UNC5A	rhx1115	DD	0.152607	FALSE	0
IFI16	rhx1103	PYD	NLRP9	rhx1116	PYD	-0.00771075	FALSE	0
IFI16	rhx1103	PYD	MAVS	rhx1117	CARD	0.696421	FALSE	0
IFI16	rhx1103	PYD	FADD	rhx1899	DED	0.780292	FALSE	0
IFI16	rhx1103	PYD	NLRP14	rhx1118	PYD	0.33868	FALSE	0
IFI16	rhx1103	PYD	NLRP13	rhx1119	PYD	0.0351168	FALSE	0
PEA15	rhx1102b	DED	NLRP10	rhx1120	PYD	1.30474	FALSE	0
PEA15	rhx1102b	DED	UNC5CL	rhx1122	DD	0.425793	FALSE	0
PEA15	rhx1102b	DED	UNC5B	rhx1123	DD	0.0564229	FALSE	0
PEA15	rhx1102b	DED	DLG5	rhx1124	CARD	-0.0104593	FALSE	0
PEA15	rhx1102b	DED	EDARADD	rhx1125	DD	-0.351142	FALSE	0
PEA15	rhx1102b	DED	NLRP7	rhx1126	PYD	-0.526042	FALSE	0
PEA15	rhx1102b	DED	POP1	rhx1127	PYD	-0.4392	FALSE	0
PEA15	rhx1102b	DED	MALT1	rhx2115	DD	3.82621	FALSE	0
PEA15	rhx1102b	DED	DEDD2	rhx1128	DED	-0.427125	FALSE	0
PEA15	rhx1102b	DED	MADD	rhx2116	DD	0.792923	FALSE	0
PEA15	rhx1102b	DED	CASP10	rhx1129	2DED	1.53775	FALSE	0
PEA15	rhx1102b	DED	CASP9	rhx2117	CARD	1.03256	FALSE	0
PEA15	rhx1102b	DED	DR3	rhx1130	DD	0.0974934	FALSE	0
PEA15	rhx1102b	DED	CARD9	rhx2137	CARD	1.84665	FALSE	0
PEA15	rhx1102b	DED	THOC1	rhx1131	DD	-0.513478	FALSE	0
PEA15	rhx1102b	DED	BCL10	rhx2138	CARD	0.942093	FALSE	0
IFI16	rhx1103	PYD	NLRP10	rhx1120	PYD	-0.36672	FALSE	0
IFI16	rhx1103	PYD	UNC5CL	rhx1122	DD	-0.537294	FALSE	0
IFI16	rhx1103	PYD	UNC5B	rhx1123	DD	-0.148107	FALSE	0
IFI16	rhx1103	PYD	DLG5	rhx1124	CARD	0.0249118	FALSE	0
IFI16	rhx1103	PYD	EDARADD	rhx1125	DD	-0.321691	FALSE	0
IFI16	rhx1103	PYD	NLRP7	rhx1126	PYD	-0.0506204	FALSE	0
IFI16	rhx1103	PYD	POP1	rhx1127	PYD	-0.465941	FALSE	0
IFI16	rhx1103	PYD	MALT1	rhx2115	DD	-0.065668	FALSE	0
IFI16	rhx1103	PYD	DEDD2	rhx1128	DED	-0.0690371	FALSE	0
IFI16	rhx1103	PYD	MADD	rhx2116	DD	-0.190611	FALSE	0
IFI16	rhx1103	PYD	CASP10	rhx1129	2DED	1.22383	FALSE	0
IFI16	rhx1103	PYD	CASP9	rhx2117	CARD	-0.479337	FALSE	0
IFI16	rhx1103	PYD	DR3	rhx1130	DD	0.128064	FALSE	0
IFI16	rhx1103	PYD	CARD9	rhx2137	CARD	-0.19653	FALSE	0
IFI16	rhx1103	PYD	THOC1	rhx1131	DD	0.280507	FALSE	0
IFI16	rhx1103	PYD	BCL10	rhx2138	CARD	-0.258409	FALSE	0
PEA15	rhx1102b	DED	CARD19	rhx1132	CARD	1.24088	FALSE	0
PEA15	rhx1102b	DED	CARD11	rhx2230	CARD	2.16761	FALSE	0
PEA15	rhx1102b	DED	NLRP4	rhx1133	PYD	0.320195	FALSE	0
PEA15	rhx1102b	DED	CARD11	rhx2232	CARD	1.15462	FALSE	0
PEA15	rhx1102b	DED	CARD10	rhx1134	CARD	0.12944	FALSE	0
PEA15	rhx1102b	DED	CARD6	rhx1135	CARD	-0.0121936	FALSE	0
PEA15	rhx1102b	DED	MDA5	rhx1137	2CARD	-0.543663	FALSE	0
PEA15	rhx1102b	DED	NLRP1	rhx1138	CARD	-0.454259	FALSE	0
PEA15	rhx1102b	DED	NLRP1	rhx1139	PYD	-0.387779	FALSE	0
[truncated: 8,540 more rows]
